# Supplementary material
Source: publisher figshare collection journal article supplement (https://springernature.figshare.com/ndownloader/files/22891898)
Supplement: Supplementary file 1 [file 22891898]

## Sheet: Navigation
	SmartPLS Report
	Please cite the use of SmartPLS: Ringle, C. M., Wende, S., and Becker, J.-M. 2015. "SmartPLS 3." Boenningstedt: SmartPLS GmbH, http://www.smartpls.com.
		Complete
	Final Results
	Path Coefficients	show
	Indirect Effects	show
	Total Effects	show
	Outer Loadings	show
	Outer Weights	show
	Quality Criteria
	R Square	show
	R Square Adjusted	show
	f Square	show
	Average Variance Extracted (AVE)	show
	Composite Reliability	show
	rho_A	show
	Cronbach's Alpha	show
	Heterotrait-Monotrait Ratio (HTMT)	show
	SRMR	show
	d_ULS	show
	d_G	show
	Histograms
	Path Coefficients Histogram	show
	Indirect Effects Histogram	show
	Total Effects Histogram	show
	Base Data
	Setting	show
	Inner Model	show
	Outer Model	show
	Indicator Data (Original)	show
	Indicator Data (Standardized)	show

## Sheet: Complete
	SmartPLS Report
	Please cite the use of SmartPLS: Ringle, C. M., Wende, S., and Becker, J.-M. 2015. "SmartPLS 3." Boenningstedt: SmartPLS GmbH, http://www.smartpls.com.
	back to navigation
	Final Results
	Path Coefficients
	Mean, STDEV, T-Values, P-Values
		Original Sample (O)	Sample Mean (M)	Standard Deviation (STDEV)	T Statistics (|O/STDEV|)	P Values
	CS -> RVI	0.528037	0.527062	0.0451916	11.6844	5.68434e-14
	FQ -> CS	0.486848	0.491147	0.0551229	8.83205	5.68434e-14
	PEQ -> CS	0.149028	0.144148	0.0425772	3.50018	0.000506513
	RSQ -> CS	0.253386	0.253025	0.0534428	4.74126	2.77405e-06
	WOM -> RVI	0.312432	0.314289	0.0456594	6.84266	2.27942e-11
	WOMxCS -> RVI	-0.0595864	-0.0585527	0.0193795	3.07472	0.00222222
	Confidence Intervals
		Original Sample (O)	Sample Mean (M)	2.5%	97.5%
	CS -> RVI	0.528037	0.527062	0.441407	0.618121
	FQ -> CS	0.486848	0.491147	0.387	0.605805
	PEQ -> CS	0.149028	0.144148	0.0684803	0.236929
	RSQ -> CS	0.253386	0.253025	0.139707	0.345905
	WOM -> RVI	0.312432	0.314289	0.218482	0.401354
	WOMxCS -> RVI	-0.0595864	-0.0585527	-0.096922	-0.0216297
	Confidence Intervals Bias Corrected
		Original Sample (O)	Sample Mean (M)	Bias	2.5%	97.5%
	CS -> RVI	0.528037	0.527062	-0.000975694	0.443173	0.625358
	FQ -> CS	0.486848	0.491147	0.00429901	0.384572	0.597413
	PEQ -> CS	0.149028	0.144148	-0.0048805	0.0814476	0.249439
	RSQ -> CS	0.253386	0.253025	-0.000360599	0.14415	0.346146
	WOM -> RVI	0.312432	0.314289	0.00185716	0.211833	0.396674
	WOMxCS -> RVI	-0.0595864	-0.0585527	0.00103365	-0.0985478	-0.0245937
	Samples
		CS -> RVI	FQ -> CS	PEQ -> CS	RSQ -> CS	WOM -> RVI	WOMxCS -> RVI
	Sample 0	0.521575	0.417619	0.180737	0.296276	0.343563	-0.0565763
	Sample 1	0.522878	0.48163	0.186637	0.229397	0.323221	-0.0402765
	Sample 2	0.476343	0.412349	0.273399	0.262294	0.39359	-0.0738691
	Sample 3	0.526483	0.452977	0.176718	0.254838	0.301851	-0.0714765
	Sample 4	0.631016	0.533578	0.138367	0.214047	0.234793	-0.046002
	Sample 5	0.542124	0.560014	0.104557	0.214192	0.307429	-0.063706
	Sample 6	0.482583	0.447453	0.116599	0.321306	0.34313	-0.0635092
	Sample 7	0.46279	0.5115	0.180823	0.163445	0.372265	-0.0465539
	Sample 8	0.502524	0.475498	0.0866486	0.310279	0.317071	-0.0815859
	Sample 9	0.544936	0.507941	0.133312	0.262229	0.312528	-0.0536287
	Sample 10	0.433635	0.496275	0.177611	0.212882	0.391034	-0.067316
	Sample 11	0.517762	0.449912	0.179861	0.236144	0.329233	-0.0335701
	Sample 12	0.562282	0.385359	0.21888	0.313789	0.298385	-0.0445626
	Sample 13	0.499201	0.439282	0.144934	0.31021	0.336033	-0.0586019
	Sample 14	0.58676	0.529411	0.144137	0.216589	0.257899	-0.0614092
	Sample 15	0.508188	0.459653	0.117797	0.310248	0.307003	-0.0985478
	Sample 16	0.487567	0.49823	0.170328	0.225768	0.343235	-0.0907147
	Sample 17	0.554558	0.506688	0.16007	0.204126	0.310908	-0.0458471
	Sample 18	0.545151	0.588077	0.135803	0.176073	0.316152	-0.0425542
	Sample 19	0.526292	0.423618	0.16631	0.281949	0.280939	-0.0652448
	Sample 20	0.406814	0.391809	0.218564	0.308823	0.404562	-0.059161
	Sample 21	0.556727	0.503071	0.134774	0.261021	0.310121	-0.0512847
	Sample 22	0.546864	0.560463	0.0994359	0.202426	0.276205	-0.0662286
	Sample 23	0.561884	0.436714	0.132459	0.303359	0.296159	-0.0474087
	Sample 24	0.58836	0.527657	0.131059	0.224931	0.231457	-0.0939164
	Sample 25	0.528581	0.501075	0.0979354	0.30212	0.339994	-0.043014
	Sample 26	0.533759	0.430449	0.260462	0.248457	0.331966	-0.0839492
	Sample 27	0.515103	0.495067	0.109443	0.293566	0.311514	-0.07386
	Sample 28	0.518111	0.552552	0.0778075	0.223273	0.331655	-0.0309566
	Sample 29	0.44042	0.448504	0.150344	0.2863	0.375279	-0.0752371
	Sample 30	0.545163	0.506675	0.194868	0.197172	0.303119	-0.0513626
	Sample 31	0.556495	0.507107	0.12846	0.258076	0.282048	-0.0614312
	Sample 32	0.498462	0.463323	0.139085	0.268658	0.326755	-0.0752407
	Sample 33	0.546335	0.400525	0.160536	0.33386	0.291732	-0.065323
	Sample 34	0.476123	0.388239	0.246855	0.293255	0.387796	-0.0595384
	Sample 35	0.570396	0.466996	0.143057	0.26148	0.27087	-0.0732381
	Sample 36	0.536165	0.449644	0.112413	0.308244	0.261793	-0.0601686
	Sample 37	0.547245	0.504584	0.172706	0.216043	0.306754	-0.0425616
	Sample 38	0.489274	0.448607	0.11699	0.319336	0.347099	-0.0509939
	Sample 39	0.496736	0.522139	0.107079	0.261619	0.342118	-0.0523475
	Sample 40	0.514381	0.470454	0.158372	0.269667	0.31839	-0.0751827
	Sample 41	0.506356	0.546453	0.0727171	0.22481	0.311733	-0.0571195
	Sample 42	0.545659	0.558589	0.0867782	0.230467	0.294586	-0.0425208
	Sample 43	0.50126	0.565438	0.168232	0.157949	0.328149	-0.0507968
	Sample 44	0.586227	0.554955	0.134911	0.1762	0.251046	-0.071187
	Sample 45	0.480219	0.490422	0.122136	0.269778	0.346075	-0.0733621
	Sample 46	0.545899	0.44347	0.136949	0.322199	0.326563	-0.0528633
	Sample 47	0.473721	0.483893	0.196974	0.218485	0.3875	-0.0563393
	Sample 48	0.581341	0.504816	0.134753	0.258622	0.252433	-0.0726246
	Sample 49	0.473686	0.429572	0.148014	0.303975	0.312779	-0.0733613
	Sample 50	0.481972	0.432127	0.237204	0.239176	0.370555	-0.0326575
	Sample 51	0.519368	0.465342	0.17071	0.257542	0.340039	-0.0480863
	Sample 52	0.508503	0.411153	0.117114	0.381684	0.34133	-0.0616874
	Sample 53	0.580962	0.521204	0.126052	0.241457	0.252431	-0.0796524
	Sample 54	0.496481	0.447218	0.146177	0.297407	0.359162	-0.0588997
	Sample 55	0.601078	0.458427	0.111084	0.332575	0.263399	-0.0409924
	Sample 56	0.532811	0.436439	0.193193	0.277579	0.293742	-0.072069
	Sample 57	0.555114	0.510934	0.177315	0.217967	0.291976	-0.0618278
	Sample 58	0.546919	0.530712	0.0919862	0.27176	0.284539	-0.080838
	Sample 59	0.525961	0.445865	0.266359	0.19877	0.302201	-0.0709973
	Sample 60	0.489558	0.474681	0.119108	0.279798	0.340141	-0.0596083
	Sample 61	0.566584	0.477477	0.136272	0.253658	0.252888	-0.0676585
	Sample 62	0.542053	0.464466	0.20687	0.230411	0.338732	-0.0238163
	Sample 63	0.452062	0.436108	0.165901	0.338247	0.399201	-0.0546512
	Sample 64	0.539922	0.543661	0.0922239	0.259134	0.320655	-0.0409951
	Sample 65	0.52077	0.454918	0.168233	0.300681	0.371781	-0.0485529
	Sample 66	0.50462	0.502383	0.135642	0.246509	0.289417	-0.107733
	Sample 67	0.464168	0.56036	0.155055	0.164306	0.330783	-0.0846253
	Sample 68	0.519986	0.454326	0.124221	0.304816	0.332388	-0.0685598
	Sample 69	0.533538	0.450134	0.1568	0.270303	0.307475	-0.0519455
	Sample 70	0.613842	0.615376	0.104026	0.148685	0.268408	-0.0241198
	Sample 71	0.477522	0.542845	0.1233	0.197565	0.40411	-0.000976397
	Sample 72	0.50177	0.409391	0.192394	0.308946	0.310136	-0.0792789
	Sample 73	0.491456	0.527371	0.0831134	0.264168	0.365793	-0.0438812
	Sample 74	0.519257	0.537922	0.0987959	0.245998	0.344545	-0.0376837
	Sample 75	0.529201	0.497877	0.16855	0.251912	0.350423	-0.0399906
	Sample 76	0.516561	0.418708	0.179248	0.305583	0.321626	-0.0644431
	Sample 77	0.598813	0.483328	0.151443	0.260346	0.236717	-0.0387935
	Sample 78	0.548929	0.605805	0.169801	0.102029	0.301152	-0.0513793
	Sample 79	0.567802	0.455982	0.116395	0.332521	0.274071	-0.0687299
	Sample 80	0.594836	0.534586	0.0964918	0.273566	0.26872	-0.0334871
	Sample 81	0.452859	0.424106	0.147223	0.319565	0.375169	-0.0699999
	Sample 82	0.499332	0.539096	0.0917847	0.214049	0.301864	-0.0823483
	Sample 83	0.497167	0.514099	0.0583809	0.304875	0.32009	-0.0887344
	Sample 84	0.551807	0.510364	0.19391	0.170082	0.270216	-0.0726356
	Sample 85	0.593241	0.472731	0.162564	0.271357	0.237072	-0.0633158
	Sample 86	0.542203	0.447672	0.147512	0.262546	0.265052	-0.0658695
	Sample 87	0.47398	0.403448	0.21993	0.30508	0.385191	-0.0710213
	Sample 88	0.452586	0.352696	0.16684	0.392039	0.304199	-0.107036
	Sample 89	0.536711	0.459786	0.180056	0.246586	0.310445	-0.0566579
	Sample 90	0.571961	0.534525	0.105494	0.26506	0.267244	-0.0721584
	Sample 91	0.561903	0.556599	0.15321	0.200519	0.305367	-0.0571255
	Sample 92	0.533245	0.534944	0.107644	0.245129	0.280395	-0.096922
	Sample 93	0.453917	0.480223	0.104869	0.304877	0.396674	-0.0568926
	Sample 94	0.536277	0.504747	0.216121	0.191982	0.309026	-0.0663087
	Sample 95	0.498059	0.501923	0.168145	0.212707	0.338515	-0.0679733
	Sample 96	0.537345	0.501082	0.135099	0.24059	0.307432	-0.0372586
	Sample 97	0.443173	0.464784	0.0909741	0.310046	0.386388	-0.064412
	Sample 98	0.554339	0.455572	0.136665	0.296907	0.287401	-0.045812
	Sample 99	0.465675	0.469729	0.0461228	0.38038	0.374067	-0.0604243
	Sample 100	0.492123	0.479505	0.0722757	0.334784	0.390015	-0.0306733
	Sample 101	0.536855	0.491834	0.0882219	0.316314	0.312753	-0.0587054
	Sample 102	0.615367	0.556563	0.145117	0.172144	0.208595	-0.0757291
	Sample 103	0.545687	0.504383	0.192923	0.208894	0.310057	-0.0564645
	Sample 104	0.447761	0.489855	0.218346	0.19189	0.379632	-0.0681636
	Sample 105	0.471674	0.524498	0.123298	0.226193	0.38373	-0.0288178
	Sample 106	0.50693	0.502964	0.148853	0.231364	0.344453	-0.0441326
	Sample 107	0.502184	0.486515	0.134068	0.254434	0.324649	-0.0542967
	Sample 108	0.613802	0.489022	0.104249	0.294941	0.205169	-0.0791628
	Sample 109	0.452625	0.427714	0.173261	0.275576	0.374043	-0.0552165
	Sample 110	0.51649	0.570651	0.0828514	0.231946	0.31871	-0.0667098
	Sample 111	0.580081	0.548987	0.135765	0.222478	0.304824	-0.0514946
	Sample 112	0.461935	0.401466	0.172589	0.305209	0.326077	-0.0980949
	Sample 113	0.479559	0.520399	0.129912	0.222754	0.357628	-0.0743152
	Sample 114	0.524501	0.523319	0.156704	0.201254	0.329088	-0.0588258
	Sample 115	0.485932	0.530422	0.112123	0.249519	0.36596	-0.0502037
	Sample 116	0.527924	0.513922	0.128327	0.260663	0.299315	-0.0816302
	Sample 117	0.617519	0.546887	0.110696	0.211573	0.246809	-0.02611
	Sample 118	0.599852	0.61576	0.0842032	0.135305	0.230054	-0.069501
	Sample 119	0.501211	0.415969	0.167514	0.310785	0.345066	-0.0384634
	Sample 120	0.567748	0.502245	0.182814	0.209217	0.304911	-0.0393621
	Sample 121	0.573254	0.554314	0.136248	0.232705	0.260754	-0.108534
	Sample 122	0.503687	0.489691	0.148429	0.23794	0.334338	-0.0547319
	Sample 123	0.578137	0.470623	0.117568	0.289693	0.26225	-0.0569894
	Sample 124	0.549189	0.474985	0.188	0.231105	0.282008	-0.0652982
	Sample 125	0.529295	0.528183	0.168693	0.21831	0.325686	-0.0805372
	Sample 126	0.482529	0.444171	0.114749	0.329274	0.370359	-0.0375877
	Sample 127	0.543287	0.424511	0.123703	0.328625	0.263053	-0.104767
	Sample 128	0.583136	0.515131	0.153176	0.244771	0.270593	-0.0677242
	Sample 129	0.567811	0.640288	0.076218	0.185752	0.313464	-0.0640295
	Sample 130	0.556992	0.508433	0.120538	0.26556	0.298682	-0.058264
	Sample 131	0.474762	0.384499	0.2143	0.312651	0.36946	-0.0538388
	Sample 132	0.611138	0.550059	0.105907	0.253315	0.252375	-0.0372348
	Sample 133	0.567015	0.509195	0.153565	0.210571	0.268233	-0.0571268
	Sample 134	0.554918	0.430047	0.198814	0.256801	0.305689	-0.0307795
	Sample 135	0.571966	0.601048	0.0972022	0.183864	0.252194	-0.0716098
	Sample 136	0.521292	0.464447	0.173554	0.25593	0.332791	-0.0695562
	Sample 137	0.521099	0.511362	0.128816	0.250043	0.278777	-0.0899924
	Sample 138	0.552873	0.507527	0.157077	0.225365	0.259773	-0.0710413
	Sample 139	0.552952	0.469294	0.209674	0.189668	0.254386	-0.0700377
	Sample 140	0.589778	0.495167	0.157725	0.263813	0.25635	-0.0587353
	Sample 141	0.57283	0.484027	0.179776	0.224371	0.282445	-0.0474421
	Sample 142	0.511733	0.469292	0.15361	0.237746	0.326602	-0.0536441
	Sample 143	0.436856	0.507091	0.11198	0.238739	0.427608	-0.0399272
	Sample 144	0.457638	0.414805	0.233425	0.229121	0.357115	-0.053589
	Sample 145	0.560734	0.543943	0.0579642	0.280761	0.277127	-0.0694466
	Sample 146	0.545822	0.59352	0.0889391	0.192965	0.271457	-0.0588497
	Sample 147	0.550103	0.496255	0.175249	0.210139	0.290378	-0.0507951
	Sample 148	0.504159	0.39527	0.181141	0.331742	0.301681	-0.107414
	Sample 149	0.552375	0.550951	0.111587	0.206387	0.274999	-0.0579327
	Sample 150	0.480235	0.392151	0.157139	0.347707	0.336066	-0.0588463
	Sample 151	0.485708	0.376854	0.236929	0.324191	0.35112	-0.065143
	Sample 152	0.522048	0.476655	0.184624	0.25578	0.345349	-0.0530798
	Sample 153	0.524173	0.538932	0.170575	0.195702	0.327504	-0.0570449
	Sample 154	0.558521	0.617182	0.120183	0.136194	0.301058	-0.0718837
	Sample 155	0.549535	0.617313	0.0535844	0.204294	0.281049	-0.0650436
	Sample 156	0.610839	0.461632	0.192623	0.230017	0.205275	-0.0672978
	Sample 157	0.479728	0.505282	0.121299	0.231401	0.335645	-0.095378
	Sample 158	0.538349	0.482731	0.22733	0.198758	0.329904	-0.052589
	Sample 159	0.552167	0.469456	0.157854	0.270543	0.321635	-0.0329534
	Sample 160	0.498562	0.456653	0.154136	0.262143	0.368848	-0.0405874
	Sample 161	0.506241	0.465676	0.118803	0.290579	0.323374	-0.0470823
	Sample 162	0.521637	0.547789	0.0808567	0.224894	0.30127	-0.0618304
	Sample 163	0.571595	0.482662	0.173211	0.253204	0.286305	-0.0415204
	Sample 164	0.462677	0.552504	0.0785404	0.22051	0.366847	-0.0579202
	Sample 165	0.545862	0.528986	0.118154	0.237342	0.280498	-0.0659096
	Sample 166	0.547926	0.51699	0.158513	0.204049	0.251364	-0.0906674
	Sample 167	0.453155	0.405291	0.19528	0.289536	0.355331	-0.0797877
	Sample 168	0.519006	0.514529	0.0987294	0.264746	0.302109	-0.0839548
	Sample 169	0.493186	0.483891	0.146624	0.237796	0.321013	-0.0650901
	Sample 170	0.486587	0.433956	0.179216	0.271844	0.329572	-0.0686475
	Sample 171	0.542197	0.573557	0.100912	0.224044	0.285521	-0.0627406
	Sample 172	0.561789	0.432838	0.180235	0.265343	0.269487	-0.0387735
	Sample 173	0.522523	0.506993	0.136293	0.248437	0.300559	-0.0638284
	Sample 174	0.574457	0.560177	0.122339	0.201251	0.265775	-0.0617497
	Sample 175	0.473564	0.375614	0.164571	0.34152	0.376703	-0.0799143
	Sample 176	0.537643	0.519143	0.0868714	0.279851	0.306074	-0.0525
	Sample 177	0.556086	0.57942	0.106139	0.177569	0.308162	-0.028482
	Sample 178	0.472866	0.454437	0.156222	0.275978	0.327433	-0.0875183
	Sample 179	0.565233	0.504703	0.189452	0.204751	0.302557	-0.0598257
	Sample 180	0.597668	0.517537	0.143809	0.217317	0.268359	-0.0396073
	Sample 181	0.618121	0.519068	0.175893	0.215204	0.211833	-0.0650777
	Sample 182	0.522342	0.476012	0.175928	0.237017	0.32359	-0.0323861
	Sample 183	0.539193	0.497114	0.166896	0.222481	0.296147	-0.0627611
	Sample 184	0.5308	0.540736	0.141578	0.206344	0.329064	-0.0542153
	Sample 185	0.547768	0.527013	0.151487	0.207116	0.319731	-0.0541361
	Sample 186	0.506575	0.534662	0.186026	0.187713	0.35078	-0.0286654
	Sample 187	0.528587	0.504453	0.198565	0.17097	0.271953	-0.0756574
	Sample 188	0.437926	0.424363	0.158977	0.326568	0.372788	-0.0956267
	Sample 189	0.520214	0.419986	0.143439	0.345544	0.326847	-0.082899
	Sample 190	0.432261	0.453044	0.165875	0.286487	0.405799	-0.0527488
	Sample 191	0.530332	0.430271	0.176906	0.301441	0.332496	-0.0216297
	Sample 192	0.510828	0.496392	0.10119	0.29109	0.338933	-0.0473302
	Sample 193	0.554753	0.537889	0.102862	0.234563	0.307514	-0.0359388
	Sample 194	0.493772	0.511208	0.200939	0.212731	0.350987	-0.0651968
	Sample 195	0.558628	0.469968	0.184434	0.248782	0.302336	-0.0588212
	Sample 196	0.533463	0.400575	0.188597	0.326124	0.29732	-0.0759546
	Sample 197	0.476284	0.46133	0.124597	0.259525	0.307468	-0.0711494
	Sample 198	0.63048	0.476039	0.183659	0.240111	0.22395	-0.0527831
	Sample 199	0.543841	0.55819	0.0886525	0.229684	0.314615	-0.019567
	Sample 200	0.482621	0.476546	0.126219	0.269717	0.320784	-0.0734657
	Sample 201	0.530894	0.443697	0.171937	0.268276	0.276204	-0.0894377
	Sample 202	0.505205	0.509446	0.126739	0.262254	0.329692	-0.0534765
	Sample 203	0.557514	0.4732	0.16047	0.25369	0.290034	-0.0719042
	Sample 204	0.458371	0.366532	0.2461	0.299186	0.353312	-0.0789329
	Sample 205	0.54338	0.527446	0.108233	0.223893	0.256425	-0.0885967
	Sample 206	0.467814	0.434575	0.185881	0.268785	0.346972	-0.0732706
	Sample 207	0.553492	0.543064	0.164126	0.194785	0.294899	-0.0692151
	Sample 208	0.50875	0.468491	0.147212	0.329391	0.349051	-0.0621166
	Sample 209	0.459666	0.477525	0.145109	0.229878	0.393892	-0.0288331
	Sample 210	0.498085	0.472078	0.0768682	0.332746	0.371135	-0.0459296
	Sample 211	0.492396	0.412087	0.159403	0.305744	0.311513	-0.0802612
	Sample 212	0.519994	0.416999	0.184819	0.298587	0.272371	-0.112126
	Sample 213	0.499351	0.360648	0.216088	0.318055	0.342942	-0.0478731
	Sample 214	0.535633	0.3992	0.240211	0.276234	0.344144	-0.0405509
	Sample 215	0.578467	0.529944	0.0749	0.26451	0.257986	-0.0680864
	Sample 216	0.559912	0.514384	0.142124	0.247198	0.326173	-0.0309048
	Sample 217	0.519454	0.446276	0.178205	0.311282	0.344767	-0.047592
	Sample 218	0.535329	0.470291	0.14583	0.267831	0.347904	-0.0143019
	Sample 219	0.441407	0.407754	0.176828	0.331218	0.402084	-0.0606076
	Sample 220	0.628264	0.537481	0.137967	0.215658	0.208042	-0.0585499
	Sample 221	0.578494	0.541512	0.128555	0.21663	0.254236	-0.0759181
	Sample 222	0.529621	0.547563	0.0652762	0.213953	0.301989	-0.0511039
	Sample 223	0.546692	0.371608	0.123764	0.366374	0.295931	-0.0449209
	Sample 224	0.458302	0.534706	0.192651	0.151539	0.361241	-0.0651226
	Sample 225	0.554319	0.554714	0.0846771	0.245898	0.311634	-0.0302254
	Sample 226	0.545772	0.486387	0.191613	0.240526	0.297608	-0.056348
	Sample 227	0.505185	0.433367	0.143779	0.302342	0.35932	-0.0474627
	Sample 228	0.54259	0.543632	0.113036	0.239597	0.317353	-0.0495908
	Sample 229	0.553495	0.543963	0.153102	0.204203	0.299572	-0.0420005
	Sample 230	0.52255	0.42638	0.22131	0.250711	0.295815	-0.0785227
	Sample 231	0.486012	0.482799	0.168543	0.246915	0.342669	-0.0727584
	Sample 232	0.514694	0.477212	0.14281	0.276163	0.364563	-0.0324754
	Sample 233	0.529387	0.487206	0.102629	0.278209	0.295856	-0.0718251
	Sample 234	0.5273	0.50535	0.120002	0.244369	0.352659	-0.0362778
	Sample 235	0.516067	0.469986	0.228465	0.217789	0.360599	-0.0429271
	Sample 236	0.46519	0.475317	0.158763	0.251372	0.352368	-0.0762287
	Sample 237	0.569475	0.52756	0.137653	0.213828	0.31065	-0.0212882
	Sample 238	0.452965	0.394351	0.134751	0.336073	0.343259	-0.102069
	Sample 239	0.478256	0.422396	0.193288	0.286721	0.340047	-0.095269
	Sample 240	0.515491	0.532369	0.143444	0.216278	0.347696	-0.0557282
	Sample 241	0.557447	0.506469	0.115796	0.266089	0.288255	-0.064555
	Sample 242	0.56524	0.516971	0.156348	0.214809	0.25676	-0.0631041
	Sample 243	0.530031	0.502215	0.249439	0.158414	0.338198	-0.018073
	Sample 244	0.445715	0.403217	0.252717	0.250348	0.385553	-0.0796605
	Sample 245	0.527796	0.542738	0.104293	0.232821	0.326991	-0.0348923
	Sample 246	0.507191	0.481819	0.151039	0.277278	0.326619	-0.0790828
	Sample 247	0.592064	0.485562	0.153983	0.2609	0.219012	-0.0933671
	Sample 248	0.531706	0.506308	0.127689	0.283268	0.350675	-0.0537401
	Sample 249	0.549643	0.479048	0.129747	0.250808	0.25769	-0.0636651
	Sample 250	0.559675	0.503983	0.158186	0.245769	0.294381	-0.0561555
	Sample 251	0.549214	0.472908	0.107179	0.295234	0.276742	-0.0924424
	Sample 252	0.497164	0.505919	0.0873414	0.28165	0.342503	-0.072656
	Sample 253	0.577609	0.538542	0.100077	0.282172	0.287104	-0.0537364
	Sample 254	0.500759	0.48964	0.162565	0.261468	0.369001	-0.0487898
	Sample 255	0.5169	0.566246	0.111962	0.209363	0.34955	-0.0361019
	Sample 256	0.568617	0.570631	0.101725	0.217374	0.281367	-0.0780352
	Sample 257	0.497569	0.482805	0.165928	0.232301	0.336011	-0.0596195
	Sample 258	0.636634	0.644463	0.106317	0.106427	0.203521	-0.0516819
	Sample 259	0.514766	0.538622	0.0712794	0.219946	0.318517	-0.0569243
	Sample 260	0.498177	0.500425	0.175976	0.252831	0.361469	-0.0579692
	Sample 261	0.541	0.459492	0.125162	0.333622	0.301833	-0.0597429
	Sample 262	0.503952	0.527047	0.131968	0.23022	0.303396	-0.090296
	Sample 263	0.513935	0.417628	0.149945	0.316504	0.296937	-0.0673744
	Sample 264	0.585605	0.517318	0.111506	0.237326	0.252192	-0.0651669
	Sample 265	0.454675	0.429005	0.154973	0.299852	0.389079	-0.0444183
	Sample 266	0.494265	0.387	0.165564	0.337791	0.338941	-0.0605482
	Sample 267	0.473906	0.389058	0.263375	0.265892	0.381238	-0.03847
	Sample 268	0.610712	0.534997	0.12848	0.232019	0.246607	-0.0562652
	Sample 269	0.551791	0.536985	0.176128	0.14415	0.261423	-0.0555683
	Sample 270	0.530533	0.488556	0.126363	0.282246	0.26608	-0.0917472
	Sample 271	0.519407	0.503106	0.134156	0.233624	0.322712	-0.0402283
	Sample 272	0.560763	0.602868	0.0839305	0.172709	0.307619	-0.025181
	Sample 273	0.60755	0.608928	0.0814476	0.195395	0.287971	-0.0407448
	Sample 274	0.567095	0.539129	0.130791	0.233948	0.293224	-0.0474803
	Sample 275	0.583185	0.575175	0.0840928	0.223567	0.256823	-0.0660556
	Sample 276	0.573813	0.611899	0.116987	0.137498	0.239905	-0.0801739
	Sample 277	0.481998	0.560608	0.169013	0.160281	0.384795	-0.0282799
	Sample 278	0.509018	0.497801	0.142026	0.252895	0.338399	-0.0457953
	Sample 279	0.452106	0.523472	0.231423	0.148007	0.408183	-0.0387307
	Sample 280	0.539014	0.621507	0.12392	0.120399	0.302651	-0.0544315
	Sample 281	0.627828	0.593016	0.149756	0.138197	0.250088	-0.0107388
	Sample 282	0.602539	0.451226	0.141589	0.320842	0.253422	-0.045995
	Sample 283	0.671236	0.473327	0.103138	0.286442	0.118553	-0.0920346
	Sample 284	0.485071	0.434955	0.131077	0.320833	0.383701	-0.0299577
	Sample 285	0.532969	0.508987	0.123255	0.263385	0.326869	-0.0544692
	Sample 286	0.523067	0.386389	0.222423	0.322136	0.333719	-0.0515385
	Sample 287	0.52436	0.467845	0.123	0.296564	0.321778	-0.0588868
	Sample 288	0.462858	0.414202	0.132609	0.353405	0.386093	-0.0565525
	Sample 289	0.604503	0.576113	0.123764	0.200826	0.279041	-0.0271534
	Sample 290	0.502488	0.489431	0.112467	0.281156	0.316422	-0.0654031
	Sample 291	0.45496	0.488463	0.103828	0.277388	0.379245	-0.0708974
	Sample 292	0.539243	0.475377	0.163234	0.252737	0.355083	-0.0392612
	Sample 293	0.509033	0.384572	0.116849	0.39919	0.331814	-0.0629302
	Sample 294	0.575676	0.562012	0.152663	0.155819	0.283176	-0.0261759
	Sample 295	0.500355	0.509799	0.122471	0.26848	0.326991	-0.0734713
	Sample 296	0.534051	0.473401	0.14379	0.250628	0.306156	-0.0680266
	Sample 297	0.452947	0.440299	0.150298	0.315782	0.382357	-0.070435
	Sample 298	0.482272	0.434462	0.148272	0.322281	0.33513	-0.0770366
	Sample 299	0.525283	0.446457	0.147949	0.31676	0.312691	-0.0654055
	Sample 300	0.577714	0.592956	0.0979601	0.139707	0.217367	-0.0829509
	Sample 301	0.466249	0.553206	0.170785	0.13874	0.385521	-0.0384689
	Sample 302	0.518731	0.442736	0.16331	0.287095	0.349023	-0.0302585
	Sample 303	0.479608	0.514924	0.150517	0.198215	0.356564	-0.0351555
	Sample 304	0.630914	0.530258	0.063606	0.232749	0.224499	-0.0329944
	Sample 305	0.589842	0.468704	0.135547	0.274966	0.203646	-0.0668328
	Sample 306	0.53515	0.526917	0.0907505	0.254505	0.314946	-0.0459174
	Sample 307	0.595534	0.400088	0.224431	0.315598	0.285959	-0.063642
	Sample 308	0.537799	0.40703	0.223983	0.267368	0.317527	-0.0427356
	Sample 309	0.471419	0.45678	0.129464	0.29694	0.360448	-0.0762285
	Sample 310	0.537874	0.461734	0.2222	0.230515	0.345434	-0.0163893
	Sample 311	0.629467	0.58901	0.111734	0.165577	0.205325	-0.0526034
	Sample 312	0.510407	0.555032	0.131307	0.18175	0.328215	-0.0568031
	Sample 313	0.586141	0.405487	0.177465	0.295359	0.267423	-0.0453924
	Sample 314	0.526722	0.490388	0.106375	0.24941	0.334826	-0.0323461
	Sample 315	0.483956	0.449245	0.174404	0.285474	0.396869	-0.0250497
	Sample 316	0.555307	0.465002	0.171636	0.254734	0.275998	-0.0632887
	Sample 317	0.649035	0.43707	0.208014	0.260162	0.22521	-0.0258583
	Sample 318	0.537351	0.489933	0.103655	0.290944	0.281694	-0.0826834
	Sample 319	0.489743	0.475824	0.170347	0.24587	0.353896	-0.0625013
	Sample 320	0.493377	0.52973	0.165818	0.192797	0.351653	-0.0547873
	Sample 321	0.571559	0.450743	0.169151	0.28461	0.266259	-0.0544062
	Sample 322	0.522622	0.407328	0.222796	0.28062	0.306454	-0.0720391
	Sample 323	0.575597	0.491049	0.105262	0.287905	0.28224	-0.0274553
	Sample 324	0.46604	0.422463	0.125026	0.336569	0.383463	-0.0430458
	Sample 325	0.630758	0.478473	0.115284	0.300342	0.242561	-0.0463567
	Sample 326	0.507114	0.514633	0.0918031	0.248139	0.334007	-0.0609745
	Sample 327	0.532784	0.410972	0.123892	0.34117	0.272565	-0.0681097
	Sample 328	0.428536	0.393319	0.152237	0.35481	0.423626	-0.0422367
	Sample 329	0.573943	0.478365	0.181349	0.24544	0.310378	-0.0247107
	Sample 330	0.439569	0.442983	0.131085	0.293491	0.369854	-0.0841744
	Sample 331	0.585011	0.521582	0.129878	0.202738	0.290165	-0.0351211
	Sample 332	0.557685	0.556236	0.122006	0.220789	0.276186	-0.0871839
	Sample 333	0.476451	0.443588	0.143182	0.304995	0.306212	-0.0953165
	Sample 334	0.568618	0.496729	0.22409	0.201125	0.2922	-0.0424673
	Sample 335	0.457783	0.522443	0.0963664	0.284079	0.341181	-0.0880215
	Sample 336	0.517661	0.489812	0.142513	0.250284	0.333488	-0.0583647
	Sample 337	0.587447	0.493976	0.0541574	0.32646	0.264081	-0.0727179
	Sample 338	0.563136	0.533321	0.112584	0.217585	0.245603	-0.0880895
	Sample 339	0.536322	0.540405	0.107322	0.253237	0.306477	-0.0729664
	Sample 340	0.540523	0.524475	0.131615	0.228895	0.304169	-0.0376952
	Sample 341	0.497601	0.439183	0.144273	0.305732	0.358719	-0.050234
	Sample 342	0.556557	0.511721	0.175931	0.179625	0.272622	-0.0350103
	Sample 343	0.520419	0.425629	0.224998	0.267834	0.328415	-0.0528823
	Sample 344	0.512802	0.513534	0.0898178	0.255756	0.354955	-0.0328213
	Sample 345	0.516671	0.462562	0.122242	0.296017	0.314796	-0.0778039
	Sample 346	0.501996	0.43524	0.116346	0.313809	0.357053	-0.0331217
	Sample 347	0.566364	0.409372	0.198201	0.264608	0.288848	-0.0485643
	Sample 348	0.600109	0.579744	0.106919	0.202129	0.276167	-0.0126187
	Sample 349	0.581983	0.590992	0.080827	0.220796	0.2557	-0.0598437
	Sample 350	0.470294	0.468252	0.0957112	0.263461	0.264897	-0.090403
	Sample 351	0.637843	0.509041	0.1782	0.23411	0.237402	-0.0412067
	Sample 352	0.541764	0.436962	0.107782	0.345905	0.291777	-0.0500914
	Sample 353	0.483367	0.408274	0.196245	0.312408	0.387867	-0.0431856
	Sample 354	0.46409	0.445147	0.0861092	0.346146	0.355579	-0.0696085
	Sample 355	0.541607	0.595869	0.134777	0.172271	0.290479	-0.0755044
	Sample 356	0.518017	0.454672	0.167062	0.284037	0.325156	-0.0492191
	Sample 357	0.503575	0.473354	0.135223	0.269992	0.359324	-0.0503686
	Sample 358	0.583996	0.550532	0.0961758	0.209853	0.210093	-0.0956334
	Sample 359	0.500436	0.50155	0.123835	0.24278	0.347167	-0.0539815
	Sample 360	0.582019	0.536624	0.12436	0.222815	0.294226	-0.0451742
	Sample 361	0.455281	0.434286	0.114567	0.34348	0.352111	-0.0847456
	Sample 362	0.53373	0.470518	0.239696	0.195515	0.293461	-0.0687461
	Sample 363	0.46721	0.478947	0.106788	0.304249	0.401354	-0.0567271
	Sample 364	0.534758	0.49848	0.125956	0.233204	0.295343	-0.0469534
	Sample 365	0.543782	0.502155	0.0912289	0.286357	0.286738	-0.0639886
	Sample 366	0.572877	0.477823	0.158502	0.251841	0.250321	-0.0752013
	Sample 367	0.485993	0.456294	0.111657	0.312597	0.334669	-0.0716505
	Sample 368	0.544092	0.522648	0.169774	0.187747	0.357547	-0.030335
	Sample 369	0.612596	0.651183	0.0699588	0.137434	0.234377	-0.0378067
	Sample 370	0.546095	0.512064	0.111959	0.27102	0.283895	-0.0824453
	Sample 371	0.464338	0.574525	0.0975006	0.198981	0.368066	-0.0635331
	Sample 372	0.552079	0.519576	0.14142	0.19371	0.218482	-0.0999429
	Sample 373	0.591517	0.505462	0.113615	0.256362	0.290306	-0.0233126
	Sample 374	0.524017	0.454137	0.128329	0.316226	0.30878	-0.0576406
	Sample 375	0.523512	0.450031	0.179607	0.256942	0.312531	-0.0883497
	Sample 376	0.520354	0.451813	0.103514	0.343825	0.328405	-0.0477941
	Sample 377	0.501868	0.533902	0.143751	0.235875	0.369379	-0.0420672
	Sample 378	0.579315	0.511048	0.184139	0.172696	0.21866	-0.0779869
	Sample 379	0.509062	0.437457	0.158269	0.282917	0.291999	-0.0944524
	Sample 380	0.540224	0.464133	0.145858	0.291441	0.340728	-0.0401611
	Sample 381	0.504111	0.577445	0.138754	0.159334	0.318812	-0.055428
	Sample 382	0.545249	0.551446	0.137163	0.18997	0.331174	-0.0306772
	Sample 383	0.556943	0.437314	0.107445	0.360763	0.306848	-0.0588407
	Sample 384	0.48845	0.464982	0.136235	0.29508	0.354732	-0.0813818
	Sample 385	0.491988	0.551444	0.149492	0.213637	0.378186	-0.0616545
	Sample 386	0.51543	0.459868	0.219125	0.210707	0.305269	-0.0699656
	Sample 387	0.493381	0.471744	0.169627	0.2322	0.309968	-0.0829777
	Sample 388	0.522058	0.521893	0.128026	0.243662	0.300005	-0.0906319
	Sample 389	0.535353	0.46142	0.0900139	0.338605	0.327514	-0.0551909
	Sample 390	0.589632	0.471265	0.13723	0.266445	0.277359	-0.0495186
	Sample 391	0.53397	0.557124	0.146715	0.16261	0.297255	-0.0732665
	Sample 392	0.473655	0.518433	0.184218	0.194702	0.401855	-0.00722961
	Sample 393	0.551571	0.488875	0.10265	0.310803	0.303776	-0.0727206
	Sample 394	0.504131	0.620302	0.157572	0.103074	0.347001	-0.0537825
	Sample 395	0.486407	0.430443	0.138965	0.320984	0.312751	-0.0876072
	Sample 396	0.457613	0.436012	0.151142	0.320452	0.36411	-0.0678423
	Sample 397	0.607298	0.61893	0.0822951	0.171599	0.247919	-0.0588228
	Sample 398	0.483033	0.368689	0.265391	0.258981	0.3592	-0.0556979
	Sample 399	0.596016	0.565846	0.120145	0.169531	0.256726	-0.00994391
	Sample 400	0.589638	0.489069	0.0963684	0.287703	0.265197	-0.0209916
	Sample 401	0.511592	0.462744	0.13881	0.300191	0.35371	-0.0454334
	Sample 402	0.530298	0.550275	0.156635	0.209576	0.32906	-0.0656544
	Sample 403	0.48661	0.502582	0.179218	0.196714	0.345126	-0.058915
	Sample 404	0.414742	0.46862	0.0833644	0.356533	0.425266	-0.0521892
	Sample 405	0.574792	0.505692	0.0922379	0.263511	0.255182	-0.0416811
	Sample 406	0.534603	0.52807	0.0851441	0.267463	0.317421	-0.0448385
	Sample 407	0.51085	0.477545	0.137206	0.255275	0.325354	-0.0498594
	Sample 408	0.540235	0.546878	0.0992872	0.227314	0.319342	-0.0486195
	Sample 409	0.476544	0.446069	0.183321	0.253382	0.375908	-0.0589777
	Sample 410	0.527466	0.5243	0.164282	0.221226	0.309479	-0.0690503
	Sample 411	0.505993	0.530515	0.101141	0.223615	0.286056	-0.0687722
	Sample 412	0.517247	0.475726	0.0632871	0.327836	0.339172	-0.0443098
	Sample 413	0.451284	0.522963	0.164783	0.20307	0.372174	-0.0891889
	Sample 414	0.519754	0.413513	0.153839	0.315316	0.315304	-0.0834938
	Sample 415	0.530557	0.441109	0.165132	0.322698	0.349341	-0.0481104
	Sample 416	0.552684	0.548152	0.146536	0.205583	0.296849	-0.05818
	Sample 417	0.584206	0.444088	0.0887732	0.313906	0.237442	-0.0669065
	Sample 418	0.518261	0.572553	0.0400431	0.28622	0.369921	-0.0342829
	Sample 419	0.520548	0.459634	0.132098	0.307054	0.341352	-0.0766209
	Sample 420	0.482658	0.503391	0.0684803	0.295908	0.339355	-0.0880667
	Sample 421	0.491251	0.597413	0.101057	0.16098	0.342631	-0.0520005
	Sample 422	0.506904	0.471435	0.173072	0.229211	0.291437	-0.0833354
	Sample 423	0.524381	0.505006	0.094481	0.272818	0.267728	-0.0746334
	Sample 424	0.625358	0.577283	0.167158	0.14751	0.233963	-0.065718
	Sample 425	0.513964	0.568599	0.102231	0.21456	0.339018	-0.0590063
	Sample 426	0.569044	0.529878	0.0929743	0.235203	0.298519	-0.0245937
	Sample 427	0.472801	0.460676	0.174788	0.25945	0.402897	-0.0432774
	Sample 428	0.559239	0.464322	0.159834	0.251912	0.249027	-0.0681957
	Sample 429	0.591847	0.532359	0.0925424	0.250585	0.269265	-0.0346961
	Sample 430	0.516668	0.416333	0.19458	0.297354	0.341914	-0.0569365
	Sample 431	0.480649	0.522664	0.101953	0.220851	0.343075	-0.0579077
	Sample 432	0.566693	0.53619	0.153212	0.219619	0.305945	-0.0227201
	Sample 433	0.542136	0.542064	0.0606159	0.282237	0.320587	-0.043037
	Sample 434	0.572297	0.446727	0.123068	0.311994	0.261584	-0.0784431
	Sample 435	0.533343	0.426771	0.181705	0.311574	0.333254	-0.0450982
	Sample 436	0.395757	0.451634	0.168787	0.264056	0.43234	-0.0651642
	Sample 437	0.546771	0.576262	0.121296	0.185505	0.270697	-0.0624362
	Sample 438	0.490948	0.443958	0.0919322	0.339377	0.352874	-0.0529279
	Sample 439	0.517394	0.536407	0.135273	0.22746	0.327175	-0.0679145
	Sample 440	0.519583	0.535171	0.156817	0.206349	0.326309	-0.0790697
	Sample 441	0.631901	0.613485	0.10688	0.138935	0.201207	-0.0611084
	Sample 442	0.520162	0.486367	0.133712	0.283534	0.310485	-0.0646073
	Sample 443	0.517864	0.518296	0.096807	0.243197	0.336752	-0.0497522
	Sample 444	0.558199	0.53276	0.106786	0.235913	0.256667	-0.0631318
	Sample 445	0.522039	0.53368	0.0709083	0.264173	0.285399	-0.0927385
	Sample 446	0.529022	0.532696	0.110418	0.234098	0.314609	-0.0423194
	Sample 447	0.557196	0.414555	0.188738	0.278902	0.256837	-0.0719628
	Sample 448	0.505817	0.424378	0.172397	0.302442	0.356317	-0.0444612
	Sample 449	0.562769	0.426258	0.0629094	0.405566	0.318057	-0.0199549
	Sample 450	0.515445	0.448586	0.168238	0.27137	0.336896	-0.0554823
	Sample 451	0.568657	0.517844	0.118556	0.238541	0.292341	-0.0476564
	Sample 452	0.551063	0.569715	0.138361	0.18928	0.299284	-0.0616003
	Sample 453	0.46419	0.4712	0.137512	0.309787	0.363408	-0.0706283
	Sample 454	0.538859	0.556729	0.140819	0.167889	0.330138	-0.0321287
	Sample 455	0.554256	0.484648	0.137895	0.269428	0.299399	-0.0387536
	Sample 456	0.571036	0.485398	0.133692	0.293311	0.325406	-0.0103817
	Sample 457	0.531657	0.582693	0.17526	0.134443	0.367162	-0.0358099
	Sample 458	0.464536	0.398735	0.221976	0.296851	0.374476	-0.0637415
	Sample 459	0.448956	0.448238	0.157933	0.284584	0.40241	-0.0511582
	Sample 460	0.534801	0.503413	0.161187	0.193618	0.287376	-0.0669449
	Sample 461	0.521603	0.521541	0.149207	0.233495	0.285361	-0.0981298
	Sample 462	0.464275	0.542843	0.20674	0.156455	0.360733	-0.0619738
	Sample 463	0.519678	0.537502	0.221486	0.150543	0.350664	-0.0366542
	Sample 464	0.529852	0.471516	0.150543	0.294555	0.333939	-0.0729599
	Sample 465	0.575804	0.487058	0.0445628	0.332729	0.253712	-0.0585863
	Sample 466	0.560147	0.541222	0.135668	0.203127	0.292549	-0.0521288
	Sample 467	0.474745	0.50948	0.148976	0.206606	0.342044	-0.0480356
	Sample 468	0.522307	0.525341	0.163913	0.192898	0.298278	-0.0508256
	Sample 469	0.516617	0.447965	0.16928	0.271617	0.318428	-0.0389577
	Sample 470	0.495183	0.474425	0.183134	0.241687	0.325308	-0.0737564
	Sample 471	0.545681	0.454585	0.103985	0.342081	0.281556	-0.0677825
	Sample 472	0.568721	0.557991	0.18384	0.157125	0.271882	-0.0490708
	Sample 473	0.507857	0.479145	0.210288	0.225456	0.345419	-0.0663341
	Sample 474	0.513563	0.479526	0.146891	0.276424	0.378403	-0.0365612
	Sample 475	0.494356	0.496685	0.206192	0.190965	0.323829	-0.0687623
	Sample 476	0.544882	0.527194	0.137493	0.236447	0.357617	-0.0329189
	Sample 477	0.497076	0.532821	0.136738	0.206593	0.359068	-0.0487516
	Sample 478	0.575847	0.574107	0.0937442	0.196412	0.272267	-0.0371844
	Sample 479	0.483257	0.366894	0.138291	0.38149	0.319885	-0.081329
	Sample 480	0.572341	0.535676	0.135286	0.205485	0.297483	-0.0417237
	Sample 481	0.470402	0.42882	0.187925	0.24454	0.330871	-0.0632422
	Sample 482	0.521739	0.479816	0.225939	0.179972	0.316333	-0.0443898
	Sample 483	0.438055	0.47543	0.0866363	0.31711	0.355737	-0.0980001
	Sample 484	0.518375	0.506393	0.214422	0.164752	0.275593	-0.0821164
	Sample 485	0.521597	0.524409	0.130734	0.238586	0.308902	-0.0636208
	Sample 486	0.411453	0.460298	0.184327	0.266968	0.418342	-0.0872386
	Sample 487	0.487453	0.393186	0.248119	0.288146	0.334766	-0.0658154
	Sample 488	0.540959	0.502564	0.121679	0.249813	0.276203	-0.0584522
	Sample 489	0.496559	0.468262	0.196271	0.257353	0.328721	-0.0963577
	Sample 490	0.464919	0.448721	0.131069	0.293445	0.378565	-0.0621884
	Sample 491	0.542864	0.458506	0.172457	0.303672	0.322683	-0.0550781
	Sample 492	0.460423	0.420094	0.199035	0.277914	0.358873	-0.0605842
	Sample 493	0.569977	0.432041	0.117025	0.341956	0.268335	-0.0469818
	Sample 494	0.55298	0.466157	0.197333	0.264516	0.305026	-0.0354794
	Sample 495	0.551503	0.498433	0.172558	0.236497	0.306601	-0.0778505
	Sample 496	0.500038	0.538622	0.114116	0.213139	0.316613	-0.0648343
	Sample 497	0.447602	0.479916	0.167707	0.236418	0.382157	-0.044546
	Sample 498	0.538603	0.407215	0.187043	0.303593	0.288281	-0.0747434
	Sample 499	0.572993	0.480825	0.1593	0.240259	0.264092	-0.0438712
	Indirect Effects
	Mean, STDEV, T-Values, P-Values
		Original Sample (O)	Sample Mean (M)	Standard Deviation (STDEV)	T Statistics (|O/STDEV|)	P Values
	CS -> RVI
	FQ -> CS
	FQ -> RVI	0.257074	0.259871	0.0433148	5.93502	5.49875e-09
	PEQ -> CS
	PEQ -> RVI	0.0786924	0.0755901	0.0219251	3.58914	0.000364469
	RSQ -> CS
	RSQ -> RVI	0.133797	0.132663	0.0272609	4.90803	1.24728e-06
	WOM -> RVI
	WOMxCS -> RVI
	Confidence Intervals
		Original Sample (O)	Sample Mean (M)	2.5%	97.5%
	CS -> RVI
	FQ -> CS
	FQ -> RVI	0.257074	0.259871	0.182545	0.34791
	PEQ -> CS
	PEQ -> RVI	0.0786924	0.0755901	0.0354035	0.120946
	RSQ -> CS
	RSQ -> RVI	0.133797	0.132663	0.0772553	0.18795
	WOM -> RVI
	WOMxCS -> RVI
	Confidence Intervals Bias Corrected
		Original Sample (O)	Sample Mean (M)	Bias	2.5%	97.5%
	CS -> RVI
	FQ -> CS
	FQ -> RVI	0.257074	0.259871	0.00279658	0.179985	0.343779
	PEQ -> CS
	PEQ -> RVI	0.0786924	0.0755901	-0.00310233	0.0451339	0.132211
	RSQ -> CS
	RSQ -> RVI	0.133797	0.132663	-0.00113423	0.0790817	0.189443
	WOM -> RVI
	WOMxCS -> RVI
	Samples
		CS -> RVI	FQ -> CS	FQ -> RVI	PEQ -> CS	PEQ -> RVI	RSQ -> CS	RSQ -> RVI	WOM -> RVI	WOMxCS -> RVI
	Sample 0			0.21782		0.0942678		0.15453
	Sample 1			0.251834		0.0975882		0.119947
	Sample 2			0.19642		0.130232		0.124942
	Sample 3			0.238485		0.0930392		0.134168
	Sample 4			0.336696		0.0873116		0.135067
	Sample 5			0.303597		0.0566828		0.116118
	Sample 6			0.215933		0.0562687		0.155057
	Sample 7			0.236717		0.083683		0.0756407
	Sample 8			0.238949		0.0435431		0.155923
	Sample 9			0.276795		0.0726467		0.142898
	Sample 10			0.215202		0.0770182		0.0923132
	Sample 11			0.232947		0.0931252		0.122267
	Sample 12			0.216681		0.123072		0.176438
	Sample 13			0.21929		0.0723514		0.154857
	Sample 14			0.310637		0.0845738		0.127086
	Sample 15			0.23359		0.0598632		0.157664
	Sample 16			0.242921		0.0830461		0.110077
	Sample 17			0.280988		0.0887682		0.1132
	Sample 18			0.32059		0.0740333		0.0959861
	Sample 19			0.222947		0.0875278		0.148388
	Sample 20			0.159393		0.088915		0.125633
	Sample 21			0.280074		0.0750323		0.145318
	Sample 22			0.306497		0.0543779		0.1107
	Sample 23			0.245383		0.0744266		0.170453
	Sample 24			0.310452		0.0771099		0.132341
	Sample 25			0.264859		0.0517668		0.159695
	Sample 26			0.229756		0.139024		0.132616
	Sample 27			0.25501		0.0563744		0.151217
	Sample 28			0.286284		0.0403129		0.11568
	Sample 29			0.19753		0.0662144		0.126092
	Sample 30			0.276221		0.106235		0.107491
	Sample 31			0.282202		0.0714872		0.143618
	Sample 32			0.230949		0.0693286		0.133916
	Sample 33			0.218821		0.0877063		0.182399
	Sample 34			0.184849		0.117533		0.139625
	Sample 35			0.266372		0.0815991		0.149147
	Sample 36			0.241083		0.060272		0.165269
	Sample 37			0.276131		0.0945124		0.118229
	Sample 38			0.219492		0.05724		0.156243
	Sample 39			0.259365		0.0531899		0.129955
	Sample 40			0.241992		0.0814636		0.138712
	Sample 41			0.2767		0.0368207		0.113834
	Sample 42			0.304799		0.0473513		0.125756
	Sample 43			0.283431		0.0843278		0.0791732
	Sample 44			0.325329		0.0790883		0.103293
	Sample 45			0.23551		0.0586521		0.129552
	Sample 46			0.24209		0.0747603		0.175888
	Sample 47			0.22923		0.0933108		0.103501
	Sample 48			0.293471		0.0783373		0.150348
	Sample 49			0.203482		0.070112		0.143989
	Sample 50			0.208273		0.114326		0.115276
	Sample 51			0.241684		0.0886611		0.133759
	Sample 52			0.209073		0.0595527		0.194087
	Sample 53			0.3028		0.0732311		0.140278
	Sample 54			0.222035		0.0725738		0.147657
	Sample 55			0.275551		0.0667704		0.199903
	Sample 56			0.232539		0.102935		0.147897
	Sample 57			0.283627		0.0984301		0.120996
	Sample 58			0.290256		0.050309		0.148631
	Sample 59			0.234507		0.140094		0.104545
	Sample 60			0.232384		0.0583101		0.136977
	Sample 61			0.27053		0.0772093		0.143718
	Sample 62			0.251765		0.112134		0.124895
	Sample 63			0.197148		0.0749977		0.152909
	Sample 64			0.293534		0.0497937		0.139912
	Sample 65			0.236908		0.0876107		0.156585
	Sample 66			0.253512		0.0684477		0.124393
	Sample 67			0.260101		0.0719715		0.0762657
	Sample 68			0.236243		0.0645934		0.1585
	Sample 69			0.240163		0.0836585		0.144217
	Sample 70			0.377744		0.0638555		0.0912693
	Sample 71			0.259221		0.0588786		0.0943417
	Sample 72			0.20542		0.0965376		0.15502
	Sample 73			0.25918		0.0408466		0.129827
	Sample 74			0.27932		0.0513004		0.127736
	Sample 75			0.263477		0.0891967		0.133312
	Sample 76			0.216288		0.0925926		0.157852
	Sample 77			0.289424		0.0906862		0.155898
	Sample 78			0.332544		0.0932087		0.0560068
	Sample 79			0.258907		0.0660893		0.188806
	Sample 80			0.317991		0.0573968		0.162727
	Sample 81			0.19206		0.0666713		0.144718
	Sample 82			0.269188		0.045831		0.106881
	Sample 83			0.255593		0.029025		0.151574
	Sample 84			0.281622		0.107001		0.0938524
	Sample 85			0.280443		0.0964396		0.16098
	Sample 86			0.242729		0.0799812		0.142353
	Sample 87			0.191226		0.104242		0.144602
	Sample 88			0.159625		0.0755097		0.177432
	Sample 89			0.246772		0.0966378		0.132346
	Sample 90			0.305727		0.0603386		0.151604
	Sample 91			0.312755		0.0860892		0.112672
	Sample 92			0.285256		0.0574007		0.130714
	Sample 93			0.217981		0.0476017		0.138389
	Sample 94			0.270684		0.115901		0.102956
	Sample 95			0.249987		0.0837462		0.105941
	Sample 96			0.269254		0.072595		0.12928
	Sample 97			0.20598		0.0403172		0.137404
	Sample 98			0.252541		0.0757589		0.164587
	Sample 99			0.218741		0.0214782		0.177134
	Sample 100			0.235975		0.0355685		0.164755
	Sample 101			0.264044		0.0473624		0.169815
	Sample 102			0.34249		0.0893001		0.105932
	Sample 103			0.275235		0.105276		0.11399
	Sample 104			0.219338		0.0977667		0.0859208
	Sample 105			0.247392		0.0581566		0.106689
	Sample 106			0.254968		0.0754583		0.117285
	Sample 107			0.24432		0.067327		0.127773
	Sample 108			0.300163		0.063988		0.181035
	Sample 109			0.193594		0.0784224		0.124733
	Sample 110			0.294735		0.0427919		0.119798
	Sample 111			0.318457		0.0787546		0.129055
	Sample 112			0.185451		0.0797248		0.140987
	Sample 113			0.249562		0.0623003		0.106824
	Sample 114			0.274481		0.0821916		0.105558
	Sample 115			0.257749		0.054484		0.121249
	Sample 116			0.271312		0.0677469		0.13761
	Sample 117			0.337713		0.0683569		0.13065
	Sample 118			0.369364		0.0505094		0.0811632
	Sample 119			0.208488		0.0839601		0.155769
	Sample 120			0.285149		0.103792		0.118782
	Sample 121			0.317762		0.0781048		0.133399
	Sample 122			0.246651		0.0747616		0.119847
	Sample 123			0.272085		0.0679704		0.167482
	Sample 124			0.260857		0.103247		0.12692
	Sample 125			0.279565		0.0892885		0.11555
	Sample 126			0.214325		0.0553697		0.158884
	Sample 127			0.230631		0.0672062		0.178538
	Sample 128			0.300391		0.0893223		0.142735
	Sample 129			0.363563		0.0432774		0.105472
	Sample 130			0.283193		0.0671387		0.147915
	Sample 131			0.182545		0.101741		0.148435
	Sample 132			0.336162		0.0647237		0.154811
	Sample 133			0.288721		0.0870739		0.119397
	Sample 134			0.238641		0.110326		0.142504
	Sample 135			0.343779		0.0555963		0.105164
	Sample 136			0.242113		0.0904723		0.133414
	Sample 137			0.26647		0.0671258		0.130297
	Sample 138			0.280598		0.0868438		0.124598
	Sample 139			0.259497		0.11594		0.104877
	Sample 140			0.292039		0.0930229		0.155591
	Sample 141			0.277265		0.102981		0.128526
	Sample 142			0.240152		0.0786074		0.121662
	Sample 143			0.221526		0.0489192		0.104295
	Sample 144			0.189831		0.106824		0.104855
	Sample 145			0.305008		0.0325025		0.157432
	Sample 146			0.323956		0.0485449		0.105324
	Sample 147			0.272991		0.0964051		0.115598
	Sample 148			0.199279		0.091324		0.167251
	Sample 149			0.304332		0.0616377		0.114003
	Sample 150			0.188325		0.0754636		0.166981
	Sample 151			0.183041		0.115078		0.157462
	Sample 152			0.248836		0.0963823		0.133529
	Sample 153			0.282494		0.0894109		0.102582
	Sample 154			0.344709		0.0671245		0.0760674
	Sample 155			0.339235		0.0294465		0.112266
	Sample 156			0.281983		0.117662		0.140504
	Sample 157			0.242398		0.0581904		0.11101
	Sample 158			0.259878		0.122383		0.107001
	Sample 159			0.259218		0.0871617		0.149385
	Sample 160			0.22767		0.0768464		0.130694
	Sample 161			0.235744		0.0601429		0.147103
	Sample 162			0.285747		0.0421778		0.117313
	Sample 163			0.275887		0.0990064		0.14473
	Sample 164			0.255631		0.0363388		0.102025
	Sample 165			0.288753		0.0644957		0.129556
	Sample 166			0.283272		0.0868533		0.111804
	Sample 167			0.18366		0.0884922		0.131205
	Sample 168			0.267044		0.0512412		0.137405
	Sample 169			0.238648		0.0723131		0.117278
	Sample 170			0.211157		0.0872044		0.132276
	Sample 171			0.310981		0.0547144		0.121476
	Sample 172			0.243164		0.101254		0.149067
	Sample 173			0.264915		0.0712164		0.129814
	Sample 174			0.321798		0.0702786		0.11561
	Sample 175			0.177877		0.0779348		0.161732
	Sample 176			0.279113		0.0467058		0.15046
	Sample 177			0.322208		0.0590224		0.0987434
	Sample 178			0.214888		0.0738722		0.130501
	Sample 179			0.285275		0.107084		0.115732
	Sample 180			0.309316		0.0859499		0.129884
	Sample 181			0.320847		0.108724		0.133022
	Sample 182			0.248641		0.0918945		0.123804
	Sample 183			0.268041		0.0899892		0.11996
	Sample 184			0.287023		0.0751496		0.109527
	Sample 185			0.288681		0.0829798		0.113451
	Sample 186			0.270847		0.0942362		0.0950905
	Sample 187			0.266647		0.104959		0.0903726
	Sample 188			0.18584		0.0696202		0.143013
	Sample 189			0.218483		0.0746192		0.179757
	Sample 190			0.195833		0.0717011		0.123837
	Sample 191			0.228187		0.093819		0.159864
	Sample 192			0.253571		0.0516905		0.148697
	Sample 193			0.298396		0.057063		0.130125
	Sample 194			0.25242		0.0992181		0.10504
	Sample 195			0.262537		0.10303		0.138977
	Sample 196			0.213692		0.10061		0.173975
	Sample 197			0.219724		0.0593438		0.123607
	Sample 198			0.300133		0.115794		0.151385
	Sample 199			0.303567		0.0482129		0.124912
	Sample 200			0.229991		0.0609161		0.130171
	Sample 201			0.235556		0.0912805		0.142426
	Sample 202			0.257375		0.0640289		0.132492
	Sample 203			0.263815		0.089464		0.141436
	Sample 204			0.168008		0.112805		0.137138
	Sample 205			0.286604		0.0588114		0.121659
	Sample 206			0.2033		0.0869578		0.125742
	Sample 207			0.300582		0.0908426		0.107812
	Sample 208			0.238345		0.0748943		0.167578
	Sample 209			0.219502		0.0667015		0.105667
	Sample 210			0.235135		0.0382869		0.165736
	Sample 211			0.20291		0.0784893		0.150547
	Sample 212			0.216837		0.0961048		0.155263
	Sample 213			0.18009		0.107904		0.158821
	Sample 214			0.213825		0.128665		0.14796
	Sample 215			0.306555		0.0433272		0.15301
	Sample 216			0.28801		0.0795767		0.138409
	Sample 217			0.23182		0.0925691		0.161697
	Sample 218			0.25176		0.0780669		0.143378
	Sample 219			0.179985		0.078053		0.146202
	Sample 220			0.33768		0.0866797		0.13549
	Sample 221			0.313261		0.0743683		0.125319
	Sample 222			0.290001		0.0345716		0.113314
	Sample 223			0.203155		0.0676607		0.200294
	Sample 224			0.245057		0.0882924		0.0694505
	Sample 225			0.307488		0.0469381		0.136306
	Sample 226			0.265456		0.104577		0.131272
	Sample 227			0.218931		0.072635		0.152738
	Sample 228			0.294969		0.061332		0.130003
	Sample 229			0.301081		0.084741		0.113026
	Sample 230			0.222805		0.115646		0.131009
	Sample 231			0.234646		0.0819139		0.120004
	Sample 232			0.245618		0.0735032		0.14214
	Sample 233			0.257921		0.0543305		0.14728
	Sample 234			0.266471		0.0632768		0.128856
	Sample 235			0.242544		0.117903		0.112394
	Sample 236			0.221112		0.0738548		0.116935
	Sample 237			0.300432		0.0783898		0.12177
	Sample 238			0.178627		0.0610375		0.152229
	Sample 239			0.202013		0.092441		0.137126
	Sample 240			0.274432		0.0739438		0.111489
	Sample 241			0.28233		0.0645504		0.148331
	Sample 242			0.292213		0.0883739		0.121419
	Sample 243			0.26619		0.132211		0.0839645
	Sample 244			0.17972		0.112639		0.111584
	Sample 245			0.286455		0.0550452		0.122882
	Sample 246			0.244374		0.0766055		0.140633
	Sample 247			0.287484		0.091168		0.15447
	Sample 248			0.269207		0.0678929		0.150615
	Sample 249			0.263306		0.0713144		0.137855
	Sample 250			0.282067		0.0885327		0.137551
	Sample 251			0.259728		0.058864		0.162146
	Sample 252			0.251525		0.0434231		0.140026
	Sample 253			0.311067		0.0578051		0.162985
	Sample 254			0.245191		0.0814059		0.130932
	Sample 255			0.292693		0.0578734		0.10822
	Sample 256			0.324471		0.0578425		0.123603
	Sample 257			0.240229		0.0825609		0.115586
	Sample 258			0.410288		0.0676853		0.0677552
	Sample 259			0.277264		0.0366922		0.113221
	Sample 260			0.2493		0.087667		0.125955
	Sample 261			0.248585		0.0677125		0.180489
	Sample 262			0.265606		0.0665053		0.11602
	Sample 263			0.214634		0.0770617		0.162663
	Sample 264			0.302944		0.0652983		0.138979
	Sample 265			0.195058		0.0704625		0.136335
	Sample 266			0.19128		0.0818324		0.166958
	Sample 267			0.184377		0.124815		0.126008
	Sample 268			0.32673		0.0784646		0.141697
	Sample 269			0.296303		0.0971858		0.0795408
	Sample 270			0.259195		0.0670397		0.149741
	Sample 271			0.261317		0.0696813		0.121346
	Sample 272			0.338066		0.0470651		0.0968488
	Sample 273			0.369954		0.0494835		0.118712
	Sample 274			0.305738		0.0741711		0.132671
	Sample 275			0.335433		0.0490417		0.130381
	Sample 276			0.351116		0.0671286		0.0788984
	Sample 277			0.270212		0.0814641		0.0772553
	Sample 278			0.25339		0.0722938		0.128728
	Sample 279			0.236665		0.104628		0.0669149
	Sample 280			0.335001		0.0667945		0.0648966
	Sample 281			0.372312		0.0940208		0.0867636
	Sample 282			0.271881		0.0853131		0.19332
	Sample 283			0.317714		0.0692301		0.19227
	Sample 284			0.210984		0.0635819		0.155627
	Sample 285			0.271274		0.0656911		0.140376
	Sample 286			0.202107		0.116342		0.168499
	Sample 287			0.245319		0.0644963		0.155507
	Sample 288			0.191717		0.0613793		0.163577
	Sample 289			0.348262		0.0748159		0.1214
	Sample 290			0.245933		0.0565131		0.141278
	Sample 291			0.222231		0.0472373		0.1262
	Sample 292			0.256344		0.088023		0.136287
	Sample 293			0.19576		0.0594802		0.203201
	Sample 294			0.323537		0.0878848		0.0897012
	Sample 295			0.255081		0.0612789		0.134335
	Sample 296			0.25282		0.0767914		0.133848
	Sample 297			0.199432		0.0680769		0.143033
	Sample 298			0.209529		0.0715074		0.155427
	Sample 299			0.234517		0.0777154		0.166389
	Sample 300			0.342559		0.0565929		0.0807108
	Sample 301			0.257932		0.0796281		0.0646873
	Sample 302			0.229661		0.0847143		0.148925
	Sample 303			0.246961		0.0721891		0.0950655
	Sample 304			0.334547		0.0401299		0.146845
	Sample 305			0.276461		0.0799513		0.162186
	Sample 306			0.28198		0.0485651		0.136198
	Sample 307			0.238266		0.133656		0.18795
	Sample 308			0.2189		0.120458		0.14379
	Sample 309			0.215335		0.061032		0.139983
	Sample 310			0.248354		0.119515		0.123988
	Sample 311			0.370763		0.0703326		0.104225
	Sample 312			0.283292		0.0670203		0.0927667
	Sample 313			0.237673		0.104019		0.173122
	Sample 314			0.258298		0.0560302		0.13137
	Sample 315			0.217415		0.084404		0.138157
	Sample 316			0.258219		0.0953107		0.141455
	Sample 317			0.283673		0.135008		0.168854
	Sample 318			0.263266		0.0556992		0.156339
	Sample 319			0.233031		0.083426		0.120413
	Sample 320			0.261356		0.0818106		0.0951215
	Sample 321			0.257626		0.09668		0.162671
	Sample 322			0.212879		0.116438		0.146658
	Sample 323			0.282646		0.0605883		0.165717
	Sample 324			0.196885		0.0582673		0.156855
	Sample 325			0.301801		0.0727162		0.189443
	Sample 326			0.260978		0.0465547		0.125835
	Sample 327			0.218959		0.0660077		0.18177
	Sample 328			0.168552		0.0652391		0.152049
	Sample 329			0.274554		0.104084		0.140868
	Sample 330			0.194722		0.0576209		0.12901
	Sample 331			0.305131		0.0759799		0.118604
	Sample 332			0.310204		0.0680408		0.12313
	Sample 333			0.211348		0.068219		0.145315
	Sample 334			0.282449		0.127422		0.114363
	Sample 335			0.239166		0.0441149		0.130046
	Sample 336			0.253556		0.0737733		0.129562
	Sample 337			0.290184		0.0318146		0.191778
	Sample 338			0.300332		0.0634003		0.12253
	Sample 339			0.289831		0.057559		0.135816
	Sample 340			0.28349		0.0711407		0.123723
	Sample 341			0.218538		0.0717902		0.152132
	Sample 342			0.284802		0.0979154		0.0999718
	Sample 343			0.221506		0.117093		0.139386
	Sample 344			0.263341		0.0460587		0.131152
	Sample 345			0.238992		0.0631592		0.152944
	Sample 346			0.218489		0.058405		0.157531
	Sample 347			0.231853		0.112254		0.149864
	Sample 348			0.34791		0.0641632		0.121299
	Sample 349			0.343948		0.0470399		0.1285
	Sample 350			0.220216		0.0450124		0.123904
	Sample 351			0.324688		0.113663		0.149326
	Sample 352			0.23673		0.0583924		0.187399
	Sample 353			0.197346		0.0948581		0.151008
	Sample 354			0.206588		0.0399624		0.160643
	Sample 355			0.322727		0.0729964		0.0933032
	Sample 356			0.235528		0.086541		0.147136
	Sample 357			0.238369		0.0680952		0.135961
	Sample 358			0.321509		0.0561663		0.122554
	Sample 359			0.250994		0.0619715		0.121496
	Sample 360			0.312325		0.07238		0.129683
	Sample 361			0.197722		0.0521601		0.15638
	Sample 362			0.25113		0.127933		0.104352
	Sample 363			0.223769		0.0498925		0.142148
	Sample 364			0.266566		0.0673563		0.124708
	Sample 365			0.273063		0.0496086		0.155716
	Sample 366			0.273734		0.0908019		0.144274
	Sample 367			0.221756		0.0542646		0.15192
	Sample 368			0.284368		0.0923725		0.102152
	Sample 369			0.398912		0.0428565		0.0841917
	Sample 370			0.279635		0.0611405		0.148003
	Sample 371			0.266774		0.0452732		0.0923945
	Sample 372			0.286847		0.0780748		0.106944
	Sample 373			0.298989		0.0672054		0.151642
	Sample 374			0.237975		0.0672465		0.165708
	Sample 375			0.235597		0.0940264		0.134512
	Sample 376			0.235103		0.0538641		0.178911
	Sample 377			0.267948		0.0721439		0.118378
	Sample 378			0.296058		0.106675		0.100045
	Sample 379			0.222692		0.0805687		0.144022
	Sample 380			0.250736		0.0787963		0.157444
	Sample 381			0.291097		0.0699475		0.080322
	Sample 382			0.300675		0.0747881		0.103581
	Sample 383			0.243559		0.0598408		0.200924
	Sample 384			0.227121		0.0665442		0.144132
	Sample 385			0.271304		0.0735481		0.105107
	Sample 386			0.23703		0.112944		0.108605
	Sample 387			0.23275		0.0836909		0.114563
	Sample 388			0.272458		0.0668369		0.127206
	Sample 389			0.247022		0.0481892		0.181273
	Sample 390			0.277873		0.0809151		0.157105
	Sample 391			0.297488		0.0783416		0.086829
	Sample 392			0.245558		0.0872559		0.0922217
	Sample 393			0.269649		0.0566188		0.17143
	Sample 394			0.312714		0.0794368		0.0519628
	Sample 395			0.20937		0.0675935		0.156129
	Sample 396			0.199525		0.0691644		0.146643
	Sample 397			0.375875		0.0499777		0.104212
	Sample 398			0.178089		0.128193		0.125096
	Sample 399			0.337253		0.0716086		0.101043
	Sample 400			0.288374		0.0568225		0.169641
	Sample 401			0.236736		0.0710139		0.153575
	Sample 402			0.29181		0.0830631		0.111138
	Sample 403			0.244562		0.0872093		0.0957231
	Sample 404			0.194356		0.0345747		0.147869
	Sample 405			0.290668		0.0530176		0.151464
	Sample 406			0.282308		0.0455183		0.142987
	Sample 407			0.243954		0.0700915		0.130407
	Sample 408			0.295442		0.0536384		0.122803
	Sample 409			0.212571		0.0873603		0.120748
	Sample 410			0.276551		0.0866532		0.116689
	Sample 411			0.268437		0.0511768		0.113147
	Sample 412			0.246068		0.032735		0.169572
	Sample 413			0.236005		0.074364		0.0916422
	Sample 414			0.214925		0.0799587		0.163887
	Sample 415			0.234034		0.0876117		0.171209
	Sample 416			0.302955		0.0809882		0.113622
	Sample 417			0.259439		0.0518618		0.183385
	Sample 418			0.296732		0.0207528		0.148337
	Sample 419			0.239261		0.0687633		0.159836
	Sample 420			0.242966		0.0330525		0.142823
	Sample 421			0.293479		0.0496441		0.0790817
	Sample 422			0.238972		0.0877307		0.116188
	Sample 423			0.264815		0.049544		0.143061
	Sample 424			0.361009		0.104533		0.0922467
	Sample 425			0.29224		0.0525433		0.110276
	Sample 426			0.301524		0.0529065		0.133841
	Sample 427			0.217808		0.0826398		0.122668
	Sample 428			0.259667		0.0893852		0.140879
	Sample 429			0.315075		0.054771		0.148308
	Sample 430			0.215106		0.100534		0.153633
	Sample 431			0.251218		0.0490036		0.106152
	Sample 432			0.303855		0.086824		0.124456
	Sample 433			0.293872		0.0328621		0.153011
	Sample 434			0.25566		0.0704313		0.178553
	Sample 435			0.227615		0.0969113		0.166176
	Sample 436			0.178737		0.0667988		0.104502
	Sample 437			0.315083		0.066321		0.101429
	Sample 438			0.21796		0.0451339		0.166616
	Sample 439			0.277534		0.0699892		0.117686
	Sample 440			0.278066		0.0814794		0.107215
	Sample 441			0.387662		0.0675373		0.087793
	Sample 442			0.25299		0.0695522		0.147484
	Sample 443			0.268407		0.0501329		0.125943
	Sample 444			0.297386		0.0596078		0.131687
	Sample 445			0.278602		0.0370169		0.137909
	Sample 446			0.281808		0.0584133		0.123843
	Sample 447			0.230988		0.105164		0.155403
	Sample 448			0.214657		0.0872014		0.15298
	Sample 449			0.239885		0.0354035		0.22824
	Sample 450			0.231221		0.0867175		0.139876
	Sample 451			0.294476		0.0674176		0.135648
	Sample 452			0.313949		0.0762457		0.104305
	Sample 453			0.218727		0.0638317		0.1438
	Sample 454			0.299999		0.0758817		0.0904686
	Sample 455			0.268619		0.0764289		0.149332
	Sample 456			0.27718		0.0763432		0.167491
	Sample 457			0.309793		0.0931783		0.0714774
	Sample 458			0.185227		0.103116		0.137898
	Sample 459			0.201239		0.070905		0.127766
	Sample 460			0.269226		0.0862028		0.103547
	Sample 461			0.272037		0.077827		0.121792
	Sample 462			0.252028		0.0959844		0.0726381
	Sample 463			0.279328		0.115101		0.0782338
	Sample 464			0.249833		0.0797655		0.15607
	Sample 465			0.28045		0.0256595		0.191587
	Sample 466			0.303164		0.075994		0.113781
	Sample 467			0.241873		0.0707255		0.0980854
	Sample 468			0.274389		0.0856128		0.100752
	Sample 469			0.231426		0.0874532		0.140322
	Sample 470			0.234927		0.090685		0.11968
	Sample 471			0.248058		0.0567427		0.186667
	Sample 472			0.317341		0.104554		0.0893605
	Sample 473			0.243337		0.106797		0.1145
	Sample 474			0.246266		0.0754377		0.141961
	Sample 475			0.245539		0.101932		0.0944047
	Sample 476			0.287258		0.0749176		0.128836
	Sample 477			0.264853		0.0679691		0.102693
	Sample 478			0.330598		0.0539823		0.113103
	Sample 479			0.177304		0.0668301		0.184358
	Sample 480			0.30659		0.0774299		0.117607
	Sample 481			0.201718		0.0884004		0.115032
	Sample 482			0.250339		0.117881		0.0938984
	Sample 483			0.208265		0.0379515		0.138912
	Sample 484			0.262501		0.111151		0.0854031
	Sample 485			0.27353		0.0681905		0.124446
	Sample 486			0.189391		0.0758421		0.109845
	Sample 487			0.19166		0.120946		0.140458
	Sample 488			0.271867		0.0658234		0.135139
	Sample 489			0.23252		0.0974599		0.127791
	Sample 490			0.208619		0.0609366		0.136428
	Sample 491			0.248906		0.0936208		0.164853
	Sample 492			0.193421		0.0916404		0.127958
	Sample 493			0.246253		0.0667014		0.194907
	Sample 494			0.257776		0.109121		0.146272
	Sample 495			0.274888		0.0951661		0.130429
	Sample 496			0.269332		0.0570622		0.106577
	Sample 497			0.214811		0.0750657		0.105821
	Sample 498			0.219327		0.100742		0.163516
	Sample 499			0.275509		0.0912779		0.137667
	Total Effects
	Mean, STDEV, T-Values, P-Values
		Original Sample (O)	Sample Mean (M)	Standard Deviation (STDEV)	T Statistics (|O/STDEV|)	P Values
	CS -> RVI	0.528037	0.527062	0.0451916	11.6844	5.68434e-14
	FQ -> CS	0.486848	0.491147	0.0551229	8.83205	5.68434e-14
	FQ -> RVI	0.257074	0.259871	0.0433148	5.93502	5.49875e-09
	PEQ -> CS	0.149028	0.144148	0.0425772	3.50018	0.000506513
	PEQ -> RVI	0.0786924	0.0755901	0.0219251	3.58914	0.000364469
	RSQ -> CS	0.253386	0.253025	0.0534428	4.74126	2.77405e-06
	RSQ -> RVI	0.133797	0.132663	0.0272609	4.90803	1.24728e-06
	WOM -> RVI	0.312432	0.314289	0.0456594	6.84266	2.27942e-11
	WOMxCS -> RVI	-0.0595864	-0.0585527	0.0193795	3.07472	0.00222222
	Confidence Intervals
		Original Sample (O)	Sample Mean (M)	2.5%	97.5%
	CS -> RVI	0.528037	0.527062	0.441407	0.618121
	FQ -> CS	0.486848	0.491147	0.387	0.605805
	FQ -> RVI	0.257074	0.259871	0.182545	0.34791
	PEQ -> CS	0.149028	0.144148	0.0684803	0.236929
	PEQ -> RVI	0.0786924	0.0755901	0.0354035	0.120946
	RSQ -> CS	0.253386	0.253025	0.139707	0.345905
	RSQ -> RVI	0.133797	0.132663	0.0772553	0.18795
	WOM -> RVI	0.312432	0.314289	0.218482	0.401354
	WOMxCS -> RVI	-0.0595864	-0.0585527	-0.096922	-0.0216297
	Confidence Intervals Bias Corrected
		Original Sample (O)	Sample Mean (M)	Bias	2.5%	97.5%
	CS -> RVI	0.528037	0.527062	-0.000975694	0.443173	0.625358
	FQ -> CS	0.486848	0.491147	0.00429901	0.384572	0.597413
	FQ -> RVI	0.257074	0.259871	0.00279658	0.179985	0.343779
	PEQ -> CS	0.149028	0.144148	-0.0048805	0.0814476	0.249439
	PEQ -> RVI	0.0786924	0.0755901	-0.00310233	0.0451339	0.132211
	RSQ -> CS	0.253386	0.253025	-0.000360599	0.14415	0.346146
	RSQ -> RVI	0.133797	0.132663	-0.00113423	0.0790817	0.189443
	WOM -> RVI	0.312432	0.314289	0.00185716	0.211833	0.396674
	WOMxCS -> RVI	-0.0595864	-0.0585527	0.00103365	-0.0985478	-0.0245937
	Samples
		CS -> RVI	FQ -> CS	FQ -> RVI	PEQ -> CS	PEQ -> RVI	RSQ -> CS	RSQ -> RVI	WOM -> RVI	WOMxCS -> RVI
	Sample 0	0.521575	0.417619	0.21782	0.180737	0.0942678	0.296276	0.15453	0.343563	-0.0565763
	Sample 1	0.522878	0.48163	0.251834	0.186637	0.0975882	0.229397	0.119947	0.323221	-0.0402765
	Sample 2	0.476343	0.412349	0.19642	0.273399	0.130232	0.262294	0.124942	0.39359	-0.0738691
	Sample 3	0.526483	0.452977	0.238485	0.176718	0.0930392	0.254838	0.134168	0.301851	-0.0714765
	Sample 4	0.631016	0.533578	0.336696	0.138367	0.0873116	0.214047	0.135067	0.234793	-0.046002
	Sample 5	0.542124	0.560014	0.303597	0.104557	0.0566828	0.214192	0.116118	0.307429	-0.063706
	Sample 6	0.482583	0.447453	0.215933	0.116599	0.0562687	0.321306	0.155057	0.34313	-0.0635092
	Sample 7	0.46279	0.5115	0.236717	0.180823	0.083683	0.163445	0.0756407	0.372265	-0.0465539
	Sample 8	0.502524	0.475498	0.238949	0.0866486	0.0435431	0.310279	0.155923	0.317071	-0.0815859
	Sample 9	0.544936	0.507941	0.276795	0.133312	0.0726467	0.262229	0.142898	0.312528	-0.0536287
	Sample 10	0.433635	0.496275	0.215202	0.177611	0.0770182	0.212882	0.0923132	0.391034	-0.067316
	Sample 11	0.517762	0.449912	0.232947	0.179861	0.0931252	0.236144	0.122267	0.329233	-0.0335701
	Sample 12	0.562282	0.385359	0.216681	0.21888	0.123072	0.313789	0.176438	0.298385	-0.0445626
	Sample 13	0.499201	0.439282	0.21929	0.144934	0.0723514	0.31021	0.154857	0.336033	-0.0586019
	Sample 14	0.58676	0.529411	0.310637	0.144137	0.0845738	0.216589	0.127086	0.257899	-0.0614092
	Sample 15	0.508188	0.459653	0.23359	0.117797	0.0598632	0.310248	0.157664	0.307003	-0.0985478
	Sample 16	0.487567	0.49823	0.242921	0.170328	0.0830461	0.225768	0.110077	0.343235	-0.0907147
	Sample 17	0.554558	0.506688	0.280988	0.16007	0.0887682	0.204126	0.1132	0.310908	-0.0458471
	Sample 18	0.545151	0.588077	0.32059	0.135803	0.0740333	0.176073	0.0959861	0.316152	-0.0425542
	Sample 19	0.526292	0.423618	0.222947	0.16631	0.0875278	0.281949	0.148388	0.280939	-0.0652448
	Sample 20	0.406814	0.391809	0.159393	0.218564	0.088915	0.308823	0.125633	0.404562	-0.059161
	Sample 21	0.556727	0.503071	0.280074	0.134774	0.0750323	0.261021	0.145318	0.310121	-0.0512847
	Sample 22	0.546864	0.560463	0.306497	0.0994359	0.0543779	0.202426	0.1107	0.276205	-0.0662286
	Sample 23	0.561884	0.436714	0.245383	0.132459	0.0744266	0.303359	0.170453	0.296159	-0.0474087
	Sample 24	0.58836	0.527657	0.310452	0.131059	0.0771099	0.224931	0.132341	0.231457	-0.0939164
	Sample 25	0.528581	0.501075	0.264859	0.0979354	0.0517668	0.30212	0.159695	0.339994	-0.043014
	Sample 26	0.533759	0.430449	0.229756	0.260462	0.139024	0.248457	0.132616	0.331966	-0.0839492
	Sample 27	0.515103	0.495067	0.25501	0.109443	0.0563744	0.293566	0.151217	0.311514	-0.07386
	Sample 28	0.518111	0.552552	0.286284	0.0778075	0.0403129	0.223273	0.11568	0.331655	-0.0309566
	Sample 29	0.44042	0.448504	0.19753	0.150344	0.0662144	0.2863	0.126092	0.375279	-0.0752371
	Sample 30	0.545163	0.506675	0.276221	0.194868	0.106235	0.197172	0.107491	0.303119	-0.0513626
	Sample 31	0.556495	0.507107	0.282202	0.12846	0.0714872	0.258076	0.143618	0.282048	-0.0614312
	Sample 32	0.498462	0.463323	0.230949	0.139085	0.0693286	0.268658	0.133916	0.326755	-0.0752407
	Sample 33	0.546335	0.400525	0.218821	0.160536	0.0877063	0.33386	0.182399	0.291732	-0.065323
	Sample 34	0.476123	0.388239	0.184849	0.246855	0.117533	0.293255	0.139625	0.387796	-0.0595384
	Sample 35	0.570396	0.466996	0.266372	0.143057	0.0815991	0.26148	0.149147	0.27087	-0.0732381
	Sample 36	0.536165	0.449644	0.241083	0.112413	0.060272	0.308244	0.165269	0.261793	-0.0601686
	Sample 37	0.547245	0.504584	0.276131	0.172706	0.0945124	0.216043	0.118229	0.306754	-0.0425616
	Sample 38	0.489274	0.448607	0.219492	0.11699	0.05724	0.319336	0.156243	0.347099	-0.0509939
	Sample 39	0.496736	0.522139	0.259365	0.107079	0.0531899	0.261619	0.129955	0.342118	-0.0523475
	Sample 40	0.514381	0.470454	0.241992	0.158372	0.0814636	0.269667	0.138712	0.31839	-0.0751827
	Sample 41	0.506356	0.546453	0.2767	0.0727171	0.0368207	0.22481	0.113834	0.311733	-0.0571195
	Sample 42	0.545659	0.558589	0.304799	0.0867782	0.0473513	0.230467	0.125756	0.294586	-0.0425208
	Sample 43	0.50126	0.565438	0.283431	0.168232	0.0843278	0.157949	0.0791732	0.328149	-0.0507968
	Sample 44	0.586227	0.554955	0.325329	0.134911	0.0790883	0.1762	0.103293	0.251046	-0.071187
	Sample 45	0.480219	0.490422	0.23551	0.122136	0.0586521	0.269778	0.129552	0.346075	-0.0733621
	Sample 46	0.545899	0.44347	0.24209	0.136949	0.0747603	0.322199	0.175888	0.326563	-0.0528633
	Sample 47	0.473721	0.483893	0.22923	0.196974	0.0933108	0.218485	0.103501	0.3875	-0.0563393
	Sample 48	0.581341	0.504816	0.293471	0.134753	0.0783373	0.258622	0.150348	0.252433	-0.0726246
	Sample 49	0.473686	0.429572	0.203482	0.148014	0.070112	0.303975	0.143989	0.312779	-0.0733613
	Sample 50	0.481972	0.432127	0.208273	0.237204	0.114326	0.239176	0.115276	0.370555	-0.0326575
	Sample 51	0.519368	0.465342	0.241684	0.17071	0.0886611	0.257542	0.133759	0.340039	-0.0480863
	Sample 52	0.508503	0.411153	0.209073	0.117114	0.0595527	0.381684	0.194087	0.34133	-0.0616874
	Sample 53	0.580962	0.521204	0.3028	0.126052	0.0732311	0.241457	0.140278	0.252431	-0.0796524
	Sample 54	0.496481	0.447218	0.222035	0.146177	0.0725738	0.297407	0.147657	0.359162	-0.0588997
	Sample 55	0.601078	0.458427	0.275551	0.111084	0.0667704	0.332575	0.199903	0.263399	-0.0409924
	Sample 56	0.532811	0.436439	0.232539	0.193193	0.102935	0.277579	0.147897	0.293742	-0.072069
	Sample 57	0.555114	0.510934	0.283627	0.177315	0.0984301	0.217967	0.120996	0.291976	-0.0618278
	Sample 58	0.546919	0.530712	0.290256	0.0919862	0.050309	0.27176	0.148631	0.284539	-0.080838
	Sample 59	0.525961	0.445865	0.234507	0.266359	0.140094	0.19877	0.104545	0.302201	-0.0709973
	Sample 60	0.489558	0.474681	0.232384	0.119108	0.0583101	0.279798	0.136977	0.340141	-0.0596083
	Sample 61	0.566584	0.477477	0.27053	0.136272	0.0772093	0.253658	0.143718	0.252888	-0.0676585
	Sample 62	0.542053	0.464466	0.251765	0.20687	0.112134	0.230411	0.124895	0.338732	-0.0238163
	Sample 63	0.452062	0.436108	0.197148	0.165901	0.0749977	0.338247	0.152909	0.399201	-0.0546512
	Sample 64	0.539922	0.543661	0.293534	0.0922239	0.0497937	0.259134	0.139912	0.320655	-0.0409951
	Sample 65	0.52077	0.454918	0.236908	0.168233	0.0876107	0.300681	0.156585	0.371781	-0.0485529
	Sample 66	0.50462	0.502383	0.253512	0.135642	0.0684477	0.246509	0.124393	0.289417	-0.107733
	Sample 67	0.464168	0.56036	0.260101	0.155055	0.0719715	0.164306	0.0762657	0.330783	-0.0846253
	Sample 68	0.519986	0.454326	0.236243	0.124221	0.0645934	0.304816	0.1585	0.332388	-0.0685598
	Sample 69	0.533538	0.450134	0.240163	0.1568	0.0836585	0.270303	0.144217	0.307475	-0.0519455
	Sample 70	0.613842	0.615376	0.377744	0.104026	0.0638555	0.148685	0.0912693	0.268408	-0.0241198
	Sample 71	0.477522	0.542845	0.259221	0.1233	0.0588786	0.197565	0.0943417	0.40411	-0.000976397
	Sample 72	0.50177	0.409391	0.20542	0.192394	0.0965376	0.308946	0.15502	0.310136	-0.0792789
	Sample 73	0.491456	0.527371	0.25918	0.0831134	0.0408466	0.264168	0.129827	0.365793	-0.0438812
	Sample 74	0.519257	0.537922	0.27932	0.0987959	0.0513004	0.245998	0.127736	0.344545	-0.0376837
	Sample 75	0.529201	0.497877	0.263477	0.16855	0.0891967	0.251912	0.133312	0.350423	-0.0399906
	Sample 76	0.516561	0.418708	0.216288	0.179248	0.0925926	0.305583	0.157852	0.321626	-0.0644431
	Sample 77	0.598813	0.483328	0.289424	0.151443	0.0906862	0.260346	0.155898	0.236717	-0.0387935
	Sample 78	0.548929	0.605805	0.332544	0.169801	0.0932087	0.102029	0.0560068	0.301152	-0.0513793
	Sample 79	0.567802	0.455982	0.258907	0.116395	0.0660893	0.332521	0.188806	0.274071	-0.0687299
	Sample 80	0.594836	0.534586	0.317991	0.0964918	0.0573968	0.273566	0.162727	0.26872	-0.0334871
	Sample 81	0.452859	0.424106	0.19206	0.147223	0.0666713	0.319565	0.144718	0.375169	-0.0699999
	Sample 82	0.499332	0.539096	0.269188	0.0917847	0.045831	0.214049	0.106881	0.301864	-0.0823483
	Sample 83	0.497167	0.514099	0.255593	0.0583809	0.029025	0.304875	0.151574	0.32009	-0.0887344
	Sample 84	0.551807	0.510364	0.281622	0.19391	0.107001	0.170082	0.0938524	0.270216	-0.0726356
	Sample 85	0.593241	0.472731	0.280443	0.162564	0.0964396	0.271357	0.16098	0.237072	-0.0633158
	Sample 86	0.542203	0.447672	0.242729	0.147512	0.0799812	0.262546	0.142353	0.265052	-0.0658695
	Sample 87	0.47398	0.403448	0.191226	0.21993	0.104242	0.30508	0.144602	0.385191	-0.0710213
	Sample 88	0.452586	0.352696	0.159625	0.16684	0.0755097	0.392039	0.177432	0.304199	-0.107036
	Sample 89	0.536711	0.459786	0.246772	0.180056	0.0966378	0.246586	0.132346	0.310445	-0.0566579
	Sample 90	0.571961	0.534525	0.305727	0.105494	0.0603386	0.26506	0.151604	0.267244	-0.0721584
	Sample 91	0.561903	0.556599	0.312755	0.15321	0.0860892	0.200519	0.112672	0.305367	-0.0571255
	Sample 92	0.533245	0.534944	0.285256	0.107644	0.0574007	0.245129	0.130714	0.280395	-0.096922
	Sample 93	0.453917	0.480223	0.217981	0.104869	0.0476017	0.304877	0.138389	0.396674	-0.0568926
	Sample 94	0.536277	0.504747	0.270684	0.216121	0.115901	0.191982	0.102956	0.309026	-0.0663087
	Sample 95	0.498059	0.501923	0.249987	0.168145	0.0837462	0.212707	0.105941	0.338515	-0.0679733
	Sample 96	0.537345	0.501082	0.269254	0.135099	0.072595	0.24059	0.12928	0.307432	-0.0372586
	Sample 97	0.443173	0.464784	0.20598	0.0909741	0.0403172	0.310046	0.137404	0.386388	-0.064412
	Sample 98	0.554339	0.455572	0.252541	0.136665	0.0757589	0.296907	0.164587	0.287401	-0.045812
	Sample 99	0.465675	0.469729	0.218741	0.0461228	0.0214782	0.38038	0.177134	0.374067	-0.0604243
	Sample 100	0.492123	0.479505	0.235975	0.0722757	0.0355685	0.334784	0.164755	0.390015	-0.0306733
	Sample 101	0.536855	0.491834	0.264044	0.0882219	0.0473624	0.316314	0.169815	0.312753	-0.0587054
	Sample 102	0.615367	0.556563	0.34249	0.145117	0.0893001	0.172144	0.105932	0.208595	-0.0757291
	Sample 103	0.545687	0.504383	0.275235	0.192923	0.105276	0.208894	0.11399	0.310057	-0.0564645
	Sample 104	0.447761	0.489855	0.219338	0.218346	0.0977667	0.19189	0.0859208	0.379632	-0.0681636
	Sample 105	0.471674	0.524498	0.247392	0.123298	0.0581566	0.226193	0.106689	0.38373	-0.0288178
	Sample 106	0.50693	0.502964	0.254968	0.148853	0.0754583	0.231364	0.117285	0.344453	-0.0441326
	Sample 107	0.502184	0.486515	0.24432	0.134068	0.067327	0.254434	0.127773	0.324649	-0.0542967
	Sample 108	0.613802	0.489022	0.300163	0.104249	0.063988	0.294941	0.181035	0.205169	-0.0791628
	Sample 109	0.452625	0.427714	0.193594	0.173261	0.0784224	0.275576	0.124733	0.374043	-0.0552165
	Sample 110	0.51649	0.570651	0.294735	0.0828514	0.0427919	0.231946	0.119798	0.31871	-0.0667098
	Sample 111	0.580081	0.548987	0.318457	0.135765	0.0787546	0.222478	0.129055	0.304824	-0.0514946
	Sample 112	0.461935	0.401466	0.185451	0.172589	0.0797248	0.305209	0.140987	0.326077	-0.0980949
	Sample 113	0.479559	0.520399	0.249562	0.129912	0.0623003	0.222754	0.106824	0.357628	-0.0743152
	Sample 114	0.524501	0.523319	0.274481	0.156704	0.0821916	0.201254	0.105558	0.329088	-0.0588258
	Sample 115	0.485932	0.530422	0.257749	0.112123	0.054484	0.249519	0.121249	0.36596	-0.0502037
	Sample 116	0.527924	0.513922	0.271312	0.128327	0.0677469	0.260663	0.13761	0.299315	-0.0816302
	Sample 117	0.617519	0.546887	0.337713	0.110696	0.0683569	0.211573	0.13065	0.246809	-0.02611
	Sample 118	0.599852	0.61576	0.369364	0.0842032	0.0505094	0.135305	0.0811632	0.230054	-0.069501
	Sample 119	0.501211	0.415969	0.208488	0.167514	0.0839601	0.310785	0.155769	0.345066	-0.0384634
	Sample 120	0.567748	0.502245	0.285149	0.182814	0.103792	0.209217	0.118782	0.304911	-0.0393621
	Sample 121	0.573254	0.554314	0.317762	0.136248	0.0781048	0.232705	0.133399	0.260754	-0.108534
	Sample 122	0.503687	0.489691	0.246651	0.148429	0.0747616	0.23794	0.119847	0.334338	-0.0547319
	Sample 123	0.578137	0.470623	0.272085	0.117568	0.0679704	0.289693	0.167482	0.26225	-0.0569894
	Sample 124	0.549189	0.474985	0.260857	0.188	0.103247	0.231105	0.12692	0.282008	-0.0652982
	Sample 125	0.529295	0.528183	0.279565	0.168693	0.0892885	0.21831	0.11555	0.325686	-0.0805372
	Sample 126	0.482529	0.444171	0.214325	0.114749	0.0553697	0.329274	0.158884	0.370359	-0.0375877
	Sample 127	0.543287	0.424511	0.230631	0.123703	0.0672062	0.328625	0.178538	0.263053	-0.104767
	Sample 128	0.583136	0.515131	0.300391	0.153176	0.0893223	0.244771	0.142735	0.270593	-0.0677242
	Sample 129	0.567811	0.640288	0.363563	0.076218	0.0432774	0.185752	0.105472	0.313464	-0.0640295
	Sample 130	0.556992	0.508433	0.283193	0.120538	0.0671387	0.26556	0.147915	0.298682	-0.058264
	Sample 131	0.474762	0.384499	0.182545	0.2143	0.101741	0.312651	0.148435	0.36946	-0.0538388
	Sample 132	0.611138	0.550059	0.336162	0.105907	0.0647237	0.253315	0.154811	0.252375	-0.0372348
	Sample 133	0.567015	0.509195	0.288721	0.153565	0.0870739	0.210571	0.119397	0.268233	-0.0571268
	Sample 134	0.554918	0.430047	0.238641	0.198814	0.110326	0.256801	0.142504	0.305689	-0.0307795
	Sample 135	0.571966	0.601048	0.343779	0.0972022	0.0555963	0.183864	0.105164	0.252194	-0.0716098
	Sample 136	0.521292	0.464447	0.242113	0.173554	0.0904723	0.25593	0.133414	0.332791	-0.0695562
	Sample 137	0.521099	0.511362	0.26647	0.128816	0.0671258	0.250043	0.130297	0.278777	-0.0899924
	Sample 138	0.552873	0.507527	0.280598	0.157077	0.0868438	0.225365	0.124598	0.259773	-0.0710413
	Sample 139	0.552952	0.469294	0.259497	0.209674	0.11594	0.189668	0.104877	0.254386	-0.0700377
	Sample 140	0.589778	0.495167	0.292039	0.157725	0.0930229	0.263813	0.155591	0.25635	-0.0587353
	Sample 141	0.57283	0.484027	0.277265	0.179776	0.102981	0.224371	0.128526	0.282445	-0.0474421
	Sample 142	0.511733	0.469292	0.240152	0.15361	0.0786074	0.237746	0.121662	0.326602	-0.0536441
	Sample 143	0.436856	0.507091	0.221526	0.11198	0.0489192	0.238739	0.104295	0.427608	-0.0399272
	Sample 144	0.457638	0.414805	0.189831	0.233425	0.106824	0.229121	0.104855	0.357115	-0.053589
	Sample 145	0.560734	0.543943	0.305008	0.0579642	0.0325025	0.280761	0.157432	0.277127	-0.0694466
	Sample 146	0.545822	0.59352	0.323956	0.0889391	0.0485449	0.192965	0.105324	0.271457	-0.0588497
	Sample 147	0.550103	0.496255	0.272991	0.175249	0.0964051	0.210139	0.115598	0.290378	-0.0507951
	Sample 148	0.504159	0.39527	0.199279	0.181141	0.091324	0.331742	0.167251	0.301681	-0.107414
	Sample 149	0.552375	0.550951	0.304332	0.111587	0.0616377	0.206387	0.114003	0.274999	-0.0579327
	Sample 150	0.480235	0.392151	0.188325	0.157139	0.0754636	0.347707	0.166981	0.336066	-0.0588463
	Sample 151	0.485708	0.376854	0.183041	0.236929	0.115078	0.324191	0.157462	0.35112	-0.065143
	Sample 152	0.522048	0.476655	0.248836	0.184624	0.0963823	0.25578	0.133529	0.345349	-0.0530798
	Sample 153	0.524173	0.538932	0.282494	0.170575	0.0894109	0.195702	0.102582	0.327504	-0.0570449
	Sample 154	0.558521	0.617182	0.344709	0.120183	0.0671245	0.136194	0.0760674	0.301058	-0.0718837
	Sample 155	0.549535	0.617313	0.339235	0.0535844	0.0294465	0.204294	0.112266	0.281049	-0.0650436
	Sample 156	0.610839	0.461632	0.281983	0.192623	0.117662	0.230017	0.140504	0.205275	-0.0672978
	Sample 157	0.479728	0.505282	0.242398	0.121299	0.0581904	0.231401	0.11101	0.335645	-0.095378
	Sample 158	0.538349	0.482731	0.259878	0.22733	0.122383	0.198758	0.107001	0.329904	-0.052589
	Sample 159	0.552167	0.469456	0.259218	0.157854	0.0871617	0.270543	0.149385	0.321635	-0.0329534
	Sample 160	0.498562	0.456653	0.22767	0.154136	0.0768464	0.262143	0.130694	0.368848	-0.0405874
	Sample 161	0.506241	0.465676	0.235744	0.118803	0.0601429	0.290579	0.147103	0.323374	-0.0470823
	Sample 162	0.521637	0.547789	0.285747	0.0808567	0.0421778	0.224894	0.117313	0.30127	-0.0618304
	Sample 163	0.571595	0.482662	0.275887	0.173211	0.0990064	0.253204	0.14473	0.286305	-0.0415204
	Sample 164	0.462677	0.552504	0.255631	0.0785404	0.0363388	0.22051	0.102025	0.366847	-0.0579202
	Sample 165	0.545862	0.528986	0.288753	0.118154	0.0644957	0.237342	0.129556	0.280498	-0.0659096
	Sample 166	0.547926	0.51699	0.283272	0.158513	0.0868533	0.204049	0.111804	0.251364	-0.0906674
	Sample 167	0.453155	0.405291	0.18366	0.19528	0.0884922	0.289536	0.131205	0.355331	-0.0797877
	Sample 168	0.519006	0.514529	0.267044	0.0987294	0.0512412	0.264746	0.137405	0.302109	-0.0839548
	Sample 169	0.493186	0.483891	0.238648	0.146624	0.0723131	0.237796	0.117278	0.321013	-0.0650901
	Sample 170	0.486587	0.433956	0.211157	0.179216	0.0872044	0.271844	0.132276	0.329572	-0.0686475
	Sample 171	0.542197	0.573557	0.310981	0.100912	0.0547144	0.224044	0.121476	0.285521	-0.0627406
	Sample 172	0.561789	0.432838	0.243164	0.180235	0.101254	0.265343	0.149067	0.269487	-0.0387735
	Sample 173	0.522523	0.506993	0.264915	0.136293	0.0712164	0.248437	0.129814	0.300559	-0.0638284
	Sample 174	0.574457	0.560177	0.321798	0.122339	0.0702786	0.201251	0.11561	0.265775	-0.0617497
	Sample 175	0.473564	0.375614	0.177877	0.164571	0.0779348	0.34152	0.161732	0.376703	-0.0799143
	Sample 176	0.537643	0.519143	0.279113	0.0868714	0.0467058	0.279851	0.15046	0.306074	-0.0525
	Sample 177	0.556086	0.57942	0.322208	0.106139	0.0590224	0.177569	0.0987434	0.308162	-0.028482
	Sample 178	0.472866	0.454437	0.214888	0.156222	0.0738722	0.275978	0.130501	0.327433	-0.0875183
	Sample 179	0.565233	0.504703	0.285275	0.189452	0.107084	0.204751	0.115732	0.302557	-0.0598257
	Sample 180	0.597668	0.517537	0.309316	0.143809	0.0859499	0.217317	0.129884	0.268359	-0.0396073
	Sample 181	0.618121	0.519068	0.320847	0.175893	0.108724	0.215204	0.133022	0.211833	-0.0650777
	Sample 182	0.522342	0.476012	0.248641	0.175928	0.0918945	0.237017	0.123804	0.32359	-0.0323861
	Sample 183	0.539193	0.497114	0.268041	0.166896	0.0899892	0.222481	0.11996	0.296147	-0.0627611
	Sample 184	0.5308	0.540736	0.287023	0.141578	0.0751496	0.206344	0.109527	0.329064	-0.0542153
	Sample 185	0.547768	0.527013	0.288681	0.151487	0.0829798	0.207116	0.113451	0.319731	-0.0541361
	Sample 186	0.506575	0.534662	0.270847	0.186026	0.0942362	0.187713	0.0950905	0.35078	-0.0286654
	Sample 187	0.528587	0.504453	0.266647	0.198565	0.104959	0.17097	0.0903726	0.271953	-0.0756574
	Sample 188	0.437926	0.424363	0.18584	0.158977	0.0696202	0.326568	0.143013	0.372788	-0.0956267
	Sample 189	0.520214	0.419986	0.218483	0.143439	0.0746192	0.345544	0.179757	0.326847	-0.082899
	Sample 190	0.432261	0.453044	0.195833	0.165875	0.0717011	0.286487	0.123837	0.405799	-0.0527488
	Sample 191	0.530332	0.430271	0.228187	0.176906	0.093819	0.301441	0.159864	0.332496	-0.0216297
	Sample 192	0.510828	0.496392	0.253571	0.10119	0.0516905	0.29109	0.148697	0.338933	-0.0473302
	Sample 193	0.554753	0.537889	0.298396	0.102862	0.057063	0.234563	0.130125	0.307514	-0.0359388
	Sample 194	0.493772	0.511208	0.25242	0.200939	0.0992181	0.212731	0.10504	0.350987	-0.0651968
	Sample 195	0.558628	0.469968	0.262537	0.184434	0.10303	0.248782	0.138977	0.302336	-0.0588212
	Sample 196	0.533463	0.400575	0.213692	0.188597	0.10061	0.326124	0.173975	0.29732	-0.0759546
	Sample 197	0.476284	0.46133	0.219724	0.124597	0.0593438	0.259525	0.123607	0.307468	-0.0711494
	Sample 198	0.63048	0.476039	0.300133	0.183659	0.115794	0.240111	0.151385	0.22395	-0.0527831
	Sample 199	0.543841	0.55819	0.303567	0.0886525	0.0482129	0.229684	0.124912	0.314615	-0.019567
	Sample 200	0.482621	0.476546	0.229991	0.126219	0.0609161	0.269717	0.130171	0.320784	-0.0734657
	Sample 201	0.530894	0.443697	0.235556	0.171937	0.0912805	0.268276	0.142426	0.276204	-0.0894377
	Sample 202	0.505205	0.509446	0.257375	0.126739	0.0640289	0.262254	0.132492	0.329692	-0.0534765
	Sample 203	0.557514	0.4732	0.263815	0.16047	0.089464	0.25369	0.141436	0.290034	-0.0719042
	Sample 204	0.458371	0.366532	0.168008	0.2461	0.112805	0.299186	0.137138	0.353312	-0.0789329
	Sample 205	0.54338	0.527446	0.286604	0.108233	0.0588114	0.223893	0.121659	0.256425	-0.0885967
	Sample 206	0.467814	0.434575	0.2033	0.185881	0.0869578	0.268785	0.125742	0.346972	-0.0732706
	Sample 207	0.553492	0.543064	0.300582	0.164126	0.0908426	0.194785	0.107812	0.294899	-0.0692151
	Sample 208	0.50875	0.468491	0.238345	0.147212	0.0748943	0.329391	0.167578	0.349051	-0.0621166
	Sample 209	0.459666	0.477525	0.219502	0.145109	0.0667015	0.229878	0.105667	0.393892	-0.0288331
	Sample 210	0.498085	0.472078	0.235135	0.0768682	0.0382869	0.332746	0.165736	0.371135	-0.0459296
	Sample 211	0.492396	0.412087	0.20291	0.159403	0.0784893	0.305744	0.150547	0.311513	-0.0802612
	Sample 212	0.519994	0.416999	0.216837	0.184819	0.0961048	0.298587	0.155263	0.272371	-0.112126
	Sample 213	0.499351	0.360648	0.18009	0.216088	0.107904	0.318055	0.158821	0.342942	-0.0478731
	Sample 214	0.535633	0.3992	0.213825	0.240211	0.128665	0.276234	0.14796	0.344144	-0.0405509
	Sample 215	0.578467	0.529944	0.306555	0.0749	0.0433272	0.26451	0.15301	0.257986	-0.0680864
	Sample 216	0.559912	0.514384	0.28801	0.142124	0.0795767	0.247198	0.138409	0.326173	-0.0309048
	Sample 217	0.519454	0.446276	0.23182	0.178205	0.0925691	0.311282	0.161697	0.344767	-0.047592
	Sample 218	0.535329	0.470291	0.25176	0.14583	0.0780669	0.267831	0.143378	0.347904	-0.0143019
	Sample 219	0.441407	0.407754	0.179985	0.176828	0.078053	0.331218	0.146202	0.402084	-0.0606076
	Sample 220	0.628264	0.537481	0.33768	0.137967	0.0866797	0.215658	0.13549	0.208042	-0.0585499
	Sample 221	0.578494	0.541512	0.313261	0.128555	0.0743683	0.21663	0.125319	0.254236	-0.0759181
	Sample 222	0.529621	0.547563	0.290001	0.0652762	0.0345716	0.213953	0.113314	0.301989	-0.0511039
	Sample 223	0.546692	0.371608	0.203155	0.123764	0.0676607	0.366374	0.200294	0.295931	-0.0449209
	Sample 224	0.458302	0.534706	0.245057	0.192651	0.0882924	0.151539	0.0694505	0.361241	-0.0651226
	Sample 225	0.554319	0.554714	0.307488	0.0846771	0.0469381	0.245898	0.136306	0.311634	-0.0302254
	Sample 226	0.545772	0.486387	0.265456	0.191613	0.104577	0.240526	0.131272	0.297608	-0.056348
	Sample 227	0.505185	0.433367	0.218931	0.143779	0.072635	0.302342	0.152738	0.35932	-0.0474627
	Sample 228	0.54259	0.543632	0.294969	0.113036	0.061332	0.239597	0.130003	0.317353	-0.0495908
	Sample 229	0.553495	0.543963	0.301081	0.153102	0.084741	0.204203	0.113026	0.299572	-0.0420005
	Sample 230	0.52255	0.42638	0.222805	0.22131	0.115646	0.250711	0.131009	0.295815	-0.0785227
	Sample 231	0.486012	0.482799	0.234646	0.168543	0.0819139	0.246915	0.120004	0.342669	-0.0727584
	Sample 232	0.514694	0.477212	0.245618	0.14281	0.0735032	0.276163	0.14214	0.364563	-0.0324754
	Sample 233	0.529387	0.487206	0.257921	0.102629	0.0543305	0.278209	0.14728	0.295856	-0.0718251
	Sample 234	0.5273	0.50535	0.266471	0.120002	0.0632768	0.244369	0.128856	0.352659	-0.0362778
	Sample 235	0.516067	0.469986	0.242544	0.228465	0.117903	0.217789	0.112394	0.360599	-0.0429271
	Sample 236	0.46519	0.475317	0.221112	0.158763	0.0738548	0.251372	0.116935	0.352368	-0.0762287
	Sample 237	0.569475	0.52756	0.300432	0.137653	0.0783898	0.213828	0.12177	0.31065	-0.0212882
	Sample 238	0.452965	0.394351	0.178627	0.134751	0.0610375	0.336073	0.152229	0.343259	-0.102069
	Sample 239	0.478256	0.422396	0.202013	0.193288	0.092441	0.286721	0.137126	0.340047	-0.095269
	Sample 240	0.515491	0.532369	0.274432	0.143444	0.0739438	0.216278	0.111489	0.347696	-0.0557282
	Sample 241	0.557447	0.506469	0.28233	0.115796	0.0645504	0.266089	0.148331	0.288255	-0.064555
	Sample 242	0.56524	0.516971	0.292213	0.156348	0.0883739	0.214809	0.121419	0.25676	-0.0631041
	Sample 243	0.530031	0.502215	0.26619	0.249439	0.132211	0.158414	0.0839645	0.338198	-0.018073
	Sample 244	0.445715	0.403217	0.17972	0.252717	0.112639	0.250348	0.111584	0.385553	-0.0796605
	Sample 245	0.527796	0.542738	0.286455	0.104293	0.0550452	0.232821	0.122882	0.326991	-0.0348923
	Sample 246	0.507191	0.481819	0.244374	0.151039	0.0766055	0.277278	0.140633	0.326619	-0.0790828
	Sample 247	0.592064	0.485562	0.287484	0.153983	0.091168	0.2609	0.15447	0.219012	-0.0933671
	Sample 248	0.531706	0.506308	0.269207	0.127689	0.0678929	0.283268	0.150615	0.350675	-0.0537401
	Sample 249	0.549643	0.479048	0.263306	0.129747	0.0713144	0.250808	0.137855	0.25769	-0.0636651
	Sample 250	0.559675	0.503983	0.282067	0.158186	0.0885327	0.245769	0.137551	0.294381	-0.0561555
	Sample 251	0.549214	0.472908	0.259728	0.107179	0.058864	0.295234	0.162146	0.276742	-0.0924424
	Sample 252	0.497164	0.505919	0.251525	0.0873414	0.0434231	0.28165	0.140026	0.342503	-0.072656
	Sample 253	0.577609	0.538542	0.311067	0.100077	0.0578051	0.282172	0.162985	0.287104	-0.0537364
	Sample 254	0.500759	0.48964	0.245191	0.162565	0.0814059	0.261468	0.130932	0.369001	-0.0487898
	Sample 255	0.5169	0.566246	0.292693	0.111962	0.0578734	0.209363	0.10822	0.34955	-0.0361019
	Sample 256	0.568617	0.570631	0.324471	0.101725	0.0578425	0.217374	0.123603	0.281367	-0.0780352
	Sample 257	0.497569	0.482805	0.240229	0.165928	0.0825609	0.232301	0.115586	0.336011	-0.0596195
	Sample 258	0.636634	0.644463	0.410288	0.106317	0.0676853	0.106427	0.0677552	0.203521	-0.0516819
	Sample 259	0.514766	0.538622	0.277264	0.0712794	0.0366922	0.219946	0.113221	0.318517	-0.0569243
	Sample 260	0.498177	0.500425	0.2493	0.175976	0.087667	0.252831	0.125955	0.361469	-0.0579692
	Sample 261	0.541	0.459492	0.248585	0.125162	0.0677125	0.333622	0.180489	0.301833	-0.0597429
	Sample 262	0.503952	0.527047	0.265606	0.131968	0.0665053	0.23022	0.11602	0.303396	-0.090296
	Sample 263	0.513935	0.417628	0.214634	0.149945	0.0770617	0.316504	0.162663	0.296937	-0.0673744
	Sample 264	0.585605	0.517318	0.302944	0.111506	0.0652983	0.237326	0.138979	0.252192	-0.0651669
	Sample 265	0.454675	0.429005	0.195058	0.154973	0.0704625	0.299852	0.136335	0.389079	-0.0444183
	Sample 266	0.494265	0.387	0.19128	0.165564	0.0818324	0.337791	0.166958	0.338941	-0.0605482
	Sample 267	0.473906	0.389058	0.184377	0.263375	0.124815	0.265892	0.126008	0.381238	-0.03847
	Sample 268	0.610712	0.534997	0.32673	0.12848	0.0784646	0.232019	0.141697	0.246607	-0.0562652
	Sample 269	0.551791	0.536985	0.296303	0.176128	0.0971858	0.14415	0.0795408	0.261423	-0.0555683
	Sample 270	0.530533	0.488556	0.259195	0.126363	0.0670397	0.282246	0.149741	0.26608	-0.0917472
	Sample 271	0.519407	0.503106	0.261317	0.134156	0.0696813	0.233624	0.121346	0.322712	-0.0402283
	Sample 272	0.560763	0.602868	0.338066	0.0839305	0.0470651	0.172709	0.0968488	0.307619	-0.025181
	Sample 273	0.60755	0.608928	0.369954	0.0814476	0.0494835	0.195395	0.118712	0.287971	-0.0407448
	Sample 274	0.567095	0.539129	0.305738	0.130791	0.0741711	0.233948	0.132671	0.293224	-0.0474803
	Sample 275	0.583185	0.575175	0.335433	0.0840928	0.0490417	0.223567	0.130381	0.256823	-0.0660556
	Sample 276	0.573813	0.611899	0.351116	0.116987	0.0671286	0.137498	0.0788984	0.239905	-0.0801739
	Sample 277	0.481998	0.560608	0.270212	0.169013	0.0814641	0.160281	0.0772553	0.384795	-0.0282799
	Sample 278	0.509018	0.497801	0.25339	0.142026	0.0722938	0.252895	0.128728	0.338399	-0.0457953
	Sample 279	0.452106	0.523472	0.236665	0.231423	0.104628	0.148007	0.0669149	0.408183	-0.0387307
	Sample 280	0.539014	0.621507	0.335001	0.12392	0.0667945	0.120399	0.0648966	0.302651	-0.0544315
	Sample 281	0.627828	0.593016	0.372312	0.149756	0.0940208	0.138197	0.0867636	0.250088	-0.0107388
	Sample 282	0.602539	0.451226	0.271881	0.141589	0.0853131	0.320842	0.19332	0.253422	-0.045995
	Sample 283	0.671236	0.473327	0.317714	0.103138	0.0692301	0.286442	0.19227	0.118553	-0.0920346
	Sample 284	0.485071	0.434955	0.210984	0.131077	0.0635819	0.320833	0.155627	0.383701	-0.0299577
	Sample 285	0.532969	0.508987	0.271274	0.123255	0.0656911	0.263385	0.140376	0.326869	-0.0544692
	Sample 286	0.523067	0.386389	0.202107	0.222423	0.116342	0.322136	0.168499	0.333719	-0.0515385
	Sample 287	0.52436	0.467845	0.245319	0.123	0.0644963	0.296564	0.155507	0.321778	-0.0588868
	Sample 288	0.462858	0.414202	0.191717	0.132609	0.0613793	0.353405	0.163577	0.386093	-0.0565525
	Sample 289	0.604503	0.576113	0.348262	0.123764	0.0748159	0.200826	0.1214	0.279041	-0.0271534
	Sample 290	0.502488	0.489431	0.245933	0.112467	0.0565131	0.281156	0.141278	0.316422	-0.0654031
	Sample 291	0.45496	0.488463	0.222231	0.103828	0.0472373	0.277388	0.1262	0.379245	-0.0708974
	Sample 292	0.539243	0.475377	0.256344	0.163234	0.088023	0.252737	0.136287	0.355083	-0.0392612
	Sample 293	0.509033	0.384572	0.19576	0.116849	0.0594802	0.39919	0.203201	0.331814	-0.0629302
	Sample 294	0.575676	0.562012	0.323537	0.152663	0.0878848	0.155819	0.0897012	0.283176	-0.0261759
	Sample 295	0.500355	0.509799	0.255081	0.122471	0.0612789	0.26848	0.134335	0.326991	-0.0734713
	Sample 296	0.534051	0.473401	0.25282	0.14379	0.0767914	0.250628	0.133848	0.306156	-0.0680266
	Sample 297	0.452947	0.440299	0.199432	0.150298	0.0680769	0.315782	0.143033	0.382357	-0.070435
	Sample 298	0.482272	0.434462	0.209529	0.148272	0.0715074	0.322281	0.155427	0.33513	-0.0770366
	Sample 299	0.525283	0.446457	0.234517	0.147949	0.0777154	0.31676	0.166389	0.312691	-0.0654055
	Sample 300	0.577714	0.592956	0.342559	0.0979601	0.0565929	0.139707	0.0807108	0.217367	-0.0829509
	Sample 301	0.466249	0.553206	0.257932	0.170785	0.0796281	0.13874	0.0646873	0.385521	-0.0384689
	Sample 302	0.518731	0.442736	0.229661	0.16331	0.0847143	0.287095	0.148925	0.349023	-0.0302585
	Sample 303	0.479608	0.514924	0.246961	0.150517	0.0721891	0.198215	0.0950655	0.356564	-0.0351555
	Sample 304	0.630914	0.530258	0.334547	0.063606	0.0401299	0.232749	0.146845	0.224499	-0.0329944
	Sample 305	0.589842	0.468704	0.276461	0.135547	0.0799513	0.274966	0.162186	0.203646	-0.0668328
	Sample 306	0.53515	0.526917	0.28198	0.0907505	0.0485651	0.254505	0.136198	0.314946	-0.0459174
	Sample 307	0.595534	0.400088	0.238266	0.224431	0.133656	0.315598	0.18795	0.285959	-0.063642
	Sample 308	0.537799	0.40703	0.2189	0.223983	0.120458	0.267368	0.14379	0.317527	-0.0427356
	Sample 309	0.471419	0.45678	0.215335	0.129464	0.061032	0.29694	0.139983	0.360448	-0.0762285
	Sample 310	0.537874	0.461734	0.248354	0.2222	0.119515	0.230515	0.123988	0.345434	-0.0163893
	Sample 311	0.629467	0.58901	0.370763	0.111734	0.0703326	0.165577	0.104225	0.205325	-0.0526034
	Sample 312	0.510407	0.555032	0.283292	0.131307	0.0670203	0.18175	0.0927667	0.328215	-0.0568031
	Sample 313	0.586141	0.405487	0.237673	0.177465	0.104019	0.295359	0.173122	0.267423	-0.0453924
	Sample 314	0.526722	0.490388	0.258298	0.106375	0.0560302	0.24941	0.13137	0.334826	-0.0323461
	Sample 315	0.483956	0.449245	0.217415	0.174404	0.084404	0.285474	0.138157	0.396869	-0.0250497
	Sample 316	0.555307	0.465002	0.258219	0.171636	0.0953107	0.254734	0.141455	0.275998	-0.0632887
	Sample 317	0.649035	0.43707	0.283673	0.208014	0.135008	0.260162	0.168854	0.22521	-0.0258583
	Sample 318	0.537351	0.489933	0.263266	0.103655	0.0556992	0.290944	0.156339	0.281694	-0.0826834
	Sample 319	0.489743	0.475824	0.233031	0.170347	0.083426	0.24587	0.120413	0.353896	-0.0625013
	Sample 320	0.493377	0.52973	0.261356	0.165818	0.0818106	0.192797	0.0951215	0.351653	-0.0547873
	Sample 321	0.571559	0.450743	0.257626	0.169151	0.09668	0.28461	0.162671	0.266259	-0.0544062
	Sample 322	0.522622	0.407328	0.212879	0.222796	0.116438	0.28062	0.146658	0.306454	-0.0720391
	Sample 323	0.575597	0.491049	0.282646	0.105262	0.0605883	0.287905	0.165717	0.28224	-0.0274553
	Sample 324	0.46604	0.422463	0.196885	0.125026	0.0582673	0.336569	0.156855	0.383463	-0.0430458
	Sample 325	0.630758	0.478473	0.301801	0.115284	0.0727162	0.300342	0.189443	0.242561	-0.0463567
	Sample 326	0.507114	0.514633	0.260978	0.0918031	0.0465547	0.248139	0.125835	0.334007	-0.0609745
	Sample 327	0.532784	0.410972	0.218959	0.123892	0.0660077	0.34117	0.18177	0.272565	-0.0681097
	Sample 328	0.428536	0.393319	0.168552	0.152237	0.0652391	0.35481	0.152049	0.423626	-0.0422367
	Sample 329	0.573943	0.478365	0.274554	0.181349	0.104084	0.24544	0.140868	0.310378	-0.0247107
	Sample 330	0.439569	0.442983	0.194722	0.131085	0.0576209	0.293491	0.12901	0.369854	-0.0841744
	Sample 331	0.585011	0.521582	0.305131	0.129878	0.0759799	0.202738	0.118604	0.290165	-0.0351211
	Sample 332	0.557685	0.556236	0.310204	0.122006	0.0680408	0.220789	0.12313	0.276186	-0.0871839
	Sample 333	0.476451	0.443588	0.211348	0.143182	0.068219	0.304995	0.145315	0.306212	-0.0953165
	Sample 334	0.568618	0.496729	0.282449	0.22409	0.127422	0.201125	0.114363	0.2922	-0.0424673
	Sample 335	0.457783	0.522443	0.239166	0.0963664	0.0441149	0.284079	0.130046	0.341181	-0.0880215
	Sample 336	0.517661	0.489812	0.253556	0.142513	0.0737733	0.250284	0.129562	0.333488	-0.0583647
	Sample 337	0.587447	0.493976	0.290184	0.0541574	0.0318146	0.32646	0.191778	0.264081	-0.0727179
	Sample 338	0.563136	0.533321	0.300332	0.112584	0.0634003	0.217585	0.12253	0.245603	-0.0880895
	Sample 339	0.536322	0.540405	0.289831	0.107322	0.057559	0.253237	0.135816	0.306477	-0.0729664
	Sample 340	0.540523	0.524475	0.28349	0.131615	0.0711407	0.228895	0.123723	0.304169	-0.0376952
	Sample 341	0.497601	0.439183	0.218538	0.144273	0.0717902	0.305732	0.152132	0.358719	-0.050234
	Sample 342	0.556557	0.511721	0.284802	0.175931	0.0979154	0.179625	0.0999718	0.272622	-0.0350103
	Sample 343	0.520419	0.425629	0.221506	0.224998	0.117093	0.267834	0.139386	0.328415	-0.0528823
	Sample 344	0.512802	0.513534	0.263341	0.0898178	0.0460587	0.255756	0.131152	0.354955	-0.0328213
	Sample 345	0.516671	0.462562	0.238992	0.122242	0.0631592	0.296017	0.152944	0.314796	-0.0778039
	Sample 346	0.501996	0.43524	0.218489	0.116346	0.058405	0.313809	0.157531	0.357053	-0.0331217
	Sample 347	0.566364	0.409372	0.231853	0.198201	0.112254	0.264608	0.149864	0.288848	-0.0485643
	Sample 348	0.600109	0.579744	0.34791	0.106919	0.0641632	0.202129	0.121299	0.276167	-0.0126187
	Sample 349	0.581983	0.590992	0.343948	0.080827	0.0470399	0.220796	0.1285	0.2557	-0.0598437
	Sample 350	0.470294	0.468252	0.220216	0.0957112	0.0450124	0.263461	0.123904	0.264897	-0.090403
	Sample 351	0.637843	0.509041	0.324688	0.1782	0.113663	0.23411	0.149326	0.237402	-0.0412067
	Sample 352	0.541764	0.436962	0.23673	0.107782	0.0583924	0.345905	0.187399	0.291777	-0.0500914
	Sample 353	0.483367	0.408274	0.197346	0.196245	0.0948581	0.312408	0.151008	0.387867	-0.0431856
	Sample 354	0.46409	0.445147	0.206588	0.0861092	0.0399624	0.346146	0.160643	0.355579	-0.0696085
	Sample 355	0.541607	0.595869	0.322727	0.134777	0.0729964	0.172271	0.0933032	0.290479	-0.0755044
	Sample 356	0.518017	0.454672	0.235528	0.167062	0.086541	0.284037	0.147136	0.325156	-0.0492191
	Sample 357	0.503575	0.473354	0.238369	0.135223	0.0680952	0.269992	0.135961	0.359324	-0.0503686
	Sample 358	0.583996	0.550532	0.321509	0.0961758	0.0561663	0.209853	0.122554	0.210093	-0.0956334
	Sample 359	0.500436	0.50155	0.250994	0.123835	0.0619715	0.24278	0.121496	0.347167	-0.0539815
	Sample 360	0.582019	0.536624	0.312325	0.12436	0.07238	0.222815	0.129683	0.294226	-0.0451742
	Sample 361	0.455281	0.434286	0.197722	0.114567	0.0521601	0.34348	0.15638	0.352111	-0.0847456
	Sample 362	0.53373	0.470518	0.25113	0.239696	0.127933	0.195515	0.104352	0.293461	-0.0687461
	Sample 363	0.46721	0.478947	0.223769	0.106788	0.0498925	0.304249	0.142148	0.401354	-0.0567271
	Sample 364	0.534758	0.49848	0.266566	0.125956	0.0673563	0.233204	0.124708	0.295343	-0.0469534
	Sample 365	0.543782	0.502155	0.273063	0.0912289	0.0496086	0.286357	0.155716	0.286738	-0.0639886
	Sample 366	0.572877	0.477823	0.273734	0.158502	0.0908019	0.251841	0.144274	0.250321	-0.0752013
	Sample 367	0.485993	0.456294	0.221756	0.111657	0.0542646	0.312597	0.15192	0.334669	-0.0716505
	Sample 368	0.544092	0.522648	0.284368	0.169774	0.0923725	0.187747	0.102152	0.357547	-0.030335
	Sample 369	0.612596	0.651183	0.398912	0.0699588	0.0428565	0.137434	0.0841917	0.234377	-0.0378067
	Sample 370	0.546095	0.512064	0.279635	0.111959	0.0611405	0.27102	0.148003	0.283895	-0.0824453
	Sample 371	0.464338	0.574525	0.266774	0.0975006	0.0452732	0.198981	0.0923945	0.368066	-0.0635331
	Sample 372	0.552079	0.519576	0.286847	0.14142	0.0780748	0.19371	0.106944	0.218482	-0.0999429
	Sample 373	0.591517	0.505462	0.298989	0.113615	0.0672054	0.256362	0.151642	0.290306	-0.0233126
	Sample 374	0.524017	0.454137	0.237975	0.128329	0.0672465	0.316226	0.165708	0.30878	-0.0576406
	Sample 375	0.523512	0.450031	0.235597	0.179607	0.0940264	0.256942	0.134512	0.312531	-0.0883497
	Sample 376	0.520354	0.451813	0.235103	0.103514	0.0538641	0.343825	0.178911	0.328405	-0.0477941
	Sample 377	0.501868	0.533902	0.267948	0.143751	0.0721439	0.235875	0.118378	0.369379	-0.0420672
	Sample 378	0.579315	0.511048	0.296058	0.184139	0.106675	0.172696	0.100045	0.21866	-0.0779869
	Sample 379	0.509062	0.437457	0.222692	0.158269	0.0805687	0.282917	0.144022	0.291999	-0.0944524
	Sample 380	0.540224	0.464133	0.250736	0.145858	0.0787963	0.291441	0.157444	0.340728	-0.0401611
	Sample 381	0.504111	0.577445	0.291097	0.138754	0.0699475	0.159334	0.080322	0.318812	-0.055428
	Sample 382	0.545249	0.551446	0.300675	0.137163	0.0747881	0.18997	0.103581	0.331174	-0.0306772
	Sample 383	0.556943	0.437314	0.243559	0.107445	0.0598408	0.360763	0.200924	0.306848	-0.0588407
	Sample 384	0.48845	0.464982	0.227121	0.136235	0.0665442	0.29508	0.144132	0.354732	-0.0813818
	Sample 385	0.491988	0.551444	0.271304	0.149492	0.0735481	0.213637	0.105107	0.378186	-0.0616545
	Sample 386	0.51543	0.459868	0.23703	0.219125	0.112944	0.210707	0.108605	0.305269	-0.0699656
	Sample 387	0.493381	0.471744	0.23275	0.169627	0.0836909	0.2322	0.114563	0.309968	-0.0829777
	Sample 388	0.522058	0.521893	0.272458	0.128026	0.0668369	0.243662	0.127206	0.300005	-0.0906319
	Sample 389	0.535353	0.46142	0.247022	0.0900139	0.0481892	0.338605	0.181273	0.327514	-0.0551909
	Sample 390	0.589632	0.471265	0.277873	0.13723	0.0809151	0.266445	0.157105	0.277359	-0.0495186
	Sample 391	0.53397	0.557124	0.297488	0.146715	0.0783416	0.16261	0.086829	0.297255	-0.0732665
	Sample 392	0.473655	0.518433	0.245558	0.184218	0.0872559	0.194702	0.0922217	0.401855	-0.00722961
	Sample 393	0.551571	0.488875	0.269649	0.10265	0.0566188	0.310803	0.17143	0.303776	-0.0727206
	Sample 394	0.504131	0.620302	0.312714	0.157572	0.0794368	0.103074	0.0519628	0.347001	-0.0537825
	Sample 395	0.486407	0.430443	0.20937	0.138965	0.0675935	0.320984	0.156129	0.312751	-0.0876072
	Sample 396	0.457613	0.436012	0.199525	0.151142	0.0691644	0.320452	0.146643	0.36411	-0.0678423
	Sample 397	0.607298	0.61893	0.375875	0.0822951	0.0499777	0.171599	0.104212	0.247919	-0.0588228
	Sample 398	0.483033	0.368689	0.178089	0.265391	0.128193	0.258981	0.125096	0.3592	-0.0556979
	Sample 399	0.596016	0.565846	0.337253	0.120145	0.0716086	0.169531	0.101043	0.256726	-0.00994391
	Sample 400	0.589638	0.489069	0.288374	0.0963684	0.0568225	0.287703	0.169641	0.265197	-0.0209916
	Sample 401	0.511592	0.462744	0.236736	0.13881	0.0710139	0.300191	0.153575	0.35371	-0.0454334
	Sample 402	0.530298	0.550275	0.29181	0.156635	0.0830631	0.209576	0.111138	0.32906	-0.0656544
	Sample 403	0.48661	0.502582	0.244562	0.179218	0.0872093	0.196714	0.0957231	0.345126	-0.058915
	Sample 404	0.414742	0.46862	0.194356	0.0833644	0.0345747	0.356533	0.147869	0.425266	-0.0521892
	Sample 405	0.574792	0.505692	0.290668	0.0922379	0.0530176	0.263511	0.151464	0.255182	-0.0416811
	Sample 406	0.534603	0.52807	0.282308	0.0851441	0.0455183	0.267463	0.142987	0.317421	-0.0448385
	Sample 407	0.51085	0.477545	0.243954	0.137206	0.0700915	0.255275	0.130407	0.325354	-0.0498594
	Sample 408	0.540235	0.546878	0.295442	0.0992872	0.0536384	0.227314	0.122803	0.319342	-0.0486195
	Sample 409	0.476544	0.446069	0.212571	0.183321	0.0873603	0.253382	0.120748	0.375908	-0.0589777
	Sample 410	0.527466	0.5243	0.276551	0.164282	0.0866532	0.221226	0.116689	0.309479	-0.0690503
	Sample 411	0.505993	0.530515	0.268437	0.101141	0.0511768	0.223615	0.113147	0.286056	-0.0687722
	Sample 412	0.517247	0.475726	0.246068	0.0632871	0.032735	0.327836	0.169572	0.339172	-0.0443098
	Sample 413	0.451284	0.522963	0.236005	0.164783	0.074364	0.20307	0.0916422	0.372174	-0.0891889
	Sample 414	0.519754	0.413513	0.214925	0.153839	0.0799587	0.315316	0.163887	0.315304	-0.0834938
	Sample 415	0.530557	0.441109	0.234034	0.165132	0.0876117	0.322698	0.171209	0.349341	-0.0481104
	Sample 416	0.552684	0.548152	0.302955	0.146536	0.0809882	0.205583	0.113622	0.296849	-0.05818
	Sample 417	0.584206	0.444088	0.259439	0.0887732	0.0518618	0.313906	0.183385	0.237442	-0.0669065
	Sample 418	0.518261	0.572553	0.296732	0.0400431	0.0207528	0.28622	0.148337	0.369921	-0.0342829
	Sample 419	0.520548	0.459634	0.239261	0.132098	0.0687633	0.307054	0.159836	0.341352	-0.0766209
	Sample 420	0.482658	0.503391	0.242966	0.0684803	0.0330525	0.295908	0.142823	0.339355	-0.0880667
	Sample 421	0.491251	0.597413	0.293479	0.101057	0.0496441	0.16098	0.0790817	0.342631	-0.0520005
	Sample 422	0.506904	0.471435	0.238972	0.173072	0.0877307	0.229211	0.116188	0.291437	-0.0833354
	Sample 423	0.524381	0.505006	0.264815	0.094481	0.049544	0.272818	0.143061	0.267728	-0.0746334
	Sample 424	0.625358	0.577283	0.361009	0.167158	0.104533	0.14751	0.0922467	0.233963	-0.065718
	Sample 425	0.513964	0.568599	0.29224	0.102231	0.0525433	0.21456	0.110276	0.339018	-0.0590063
	Sample 426	0.569044	0.529878	0.301524	0.0929743	0.0529065	0.235203	0.133841	0.298519	-0.0245937
	Sample 427	0.472801	0.460676	0.217808	0.174788	0.0826398	0.25945	0.122668	0.402897	-0.0432774
	Sample 428	0.559239	0.464322	0.259667	0.159834	0.0893852	0.251912	0.140879	0.249027	-0.0681957
	Sample 429	0.591847	0.532359	0.315075	0.0925424	0.054771	0.250585	0.148308	0.269265	-0.0346961
	Sample 430	0.516668	0.416333	0.215106	0.19458	0.100534	0.297354	0.153633	0.341914	-0.0569365
	Sample 431	0.480649	0.522664	0.251218	0.101953	0.0490036	0.220851	0.106152	0.343075	-0.0579077
	Sample 432	0.566693	0.53619	0.303855	0.153212	0.086824	0.219619	0.124456	0.305945	-0.0227201
	Sample 433	0.542136	0.542064	0.293872	0.0606159	0.0328621	0.282237	0.153011	0.320587	-0.043037
	Sample 434	0.572297	0.446727	0.25566	0.123068	0.0704313	0.311994	0.178553	0.261584	-0.0784431
	Sample 435	0.533343	0.426771	0.227615	0.181705	0.0969113	0.311574	0.166176	0.333254	-0.0450982
	Sample 436	0.395757	0.451634	0.178737	0.168787	0.0667988	0.264056	0.104502	0.43234	-0.0651642
	Sample 437	0.546771	0.576262	0.315083	0.121296	0.066321	0.185505	0.101429	0.270697	-0.0624362
	Sample 438	0.490948	0.443958	0.21796	0.0919322	0.0451339	0.339377	0.166616	0.352874	-0.0529279
	Sample 439	0.517394	0.536407	0.277534	0.135273	0.0699892	0.22746	0.117686	0.327175	-0.0679145
	Sample 440	0.519583	0.535171	0.278066	0.156817	0.0814794	0.206349	0.107215	0.326309	-0.0790697
	Sample 441	0.631901	0.613485	0.387662	0.10688	0.0675373	0.138935	0.087793	0.201207	-0.0611084
	Sample 442	0.520162	0.486367	0.25299	0.133712	0.0695522	0.283534	0.147484	0.310485	-0.0646073
	Sample 443	0.517864	0.518296	0.268407	0.096807	0.0501329	0.243197	0.125943	0.336752	-0.0497522
	Sample 444	0.558199	0.53276	0.297386	0.106786	0.0596078	0.235913	0.131687	0.256667	-0.0631318
	Sample 445	0.522039	0.53368	0.278602	0.0709083	0.0370169	0.264173	0.137909	0.285399	-0.0927385
	Sample 446	0.529022	0.532696	0.281808	0.110418	0.0584133	0.234098	0.123843	0.314609	-0.0423194
	Sample 447	0.557196	0.414555	0.230988	0.188738	0.105164	0.278902	0.155403	0.256837	-0.0719628
	Sample 448	0.505817	0.424378	0.214657	0.172397	0.0872014	0.302442	0.15298	0.356317	-0.0444612
	Sample 449	0.562769	0.426258	0.239885	0.0629094	0.0354035	0.405566	0.22824	0.318057	-0.0199549
	Sample 450	0.515445	0.448586	0.231221	0.168238	0.0867175	0.27137	0.139876	0.336896	-0.0554823
	Sample 451	0.568657	0.517844	0.294476	0.118556	0.0674176	0.238541	0.135648	0.292341	-0.0476564
	Sample 452	0.551063	0.569715	0.313949	0.138361	0.0762457	0.18928	0.104305	0.299284	-0.0616003
	Sample 453	0.46419	0.4712	0.218727	0.137512	0.0638317	0.309787	0.1438	0.363408	-0.0706283
	Sample 454	0.538859	0.556729	0.299999	0.140819	0.0758817	0.167889	0.0904686	0.330138	-0.0321287
	Sample 455	0.554256	0.484648	0.268619	0.137895	0.0764289	0.269428	0.149332	0.299399	-0.0387536
	Sample 456	0.571036	0.485398	0.27718	0.133692	0.0763432	0.293311	0.167491	0.325406	-0.0103817
	Sample 457	0.531657	0.582693	0.309793	0.17526	0.0931783	0.134443	0.0714774	0.367162	-0.0358099
	Sample 458	0.464536	0.398735	0.185227	0.221976	0.103116	0.296851	0.137898	0.374476	-0.0637415
	Sample 459	0.448956	0.448238	0.201239	0.157933	0.070905	0.284584	0.127766	0.40241	-0.0511582
	Sample 460	0.534801	0.503413	0.269226	0.161187	0.0862028	0.193618	0.103547	0.287376	-0.0669449
	Sample 461	0.521603	0.521541	0.272037	0.149207	0.077827	0.233495	0.121792	0.285361	-0.0981298
	Sample 462	0.464275	0.542843	0.252028	0.20674	0.0959844	0.156455	0.0726381	0.360733	-0.0619738
	Sample 463	0.519678	0.537502	0.279328	0.221486	0.115101	0.150543	0.0782338	0.350664	-0.0366542
	Sample 464	0.529852	0.471516	0.249833	0.150543	0.0797655	0.294555	0.15607	0.333939	-0.0729599
	Sample 465	0.575804	0.487058	0.28045	0.0445628	0.0256595	0.332729	0.191587	0.253712	-0.0585863
	Sample 466	0.560147	0.541222	0.303164	0.135668	0.075994	0.203127	0.113781	0.292549	-0.0521288
	Sample 467	0.474745	0.50948	0.241873	0.148976	0.0707255	0.206606	0.0980854	0.342044	-0.0480356
	Sample 468	0.522307	0.525341	0.274389	0.163913	0.0856128	0.192898	0.100752	0.298278	-0.0508256
	Sample 469	0.516617	0.447965	0.231426	0.16928	0.0874532	0.271617	0.140322	0.318428	-0.0389577
	Sample 470	0.495183	0.474425	0.234927	0.183134	0.090685	0.241687	0.11968	0.325308	-0.0737564
	Sample 471	0.545681	0.454585	0.248058	0.103985	0.0567427	0.342081	0.186667	0.281556	-0.0677825
	Sample 472	0.568721	0.557991	0.317341	0.18384	0.104554	0.157125	0.0893605	0.271882	-0.0490708
	Sample 473	0.507857	0.479145	0.243337	0.210288	0.106797	0.225456	0.1145	0.345419	-0.0663341
	Sample 474	0.513563	0.479526	0.246266	0.146891	0.0754377	0.276424	0.141961	0.378403	-0.0365612
	Sample 475	0.494356	0.496685	0.245539	0.206192	0.101932	0.190965	0.0944047	0.323829	-0.0687623
	Sample 476	0.544882	0.527194	0.287258	0.137493	0.0749176	0.236447	0.128836	0.357617	-0.0329189
	Sample 477	0.497076	0.532821	0.264853	0.136738	0.0679691	0.206593	0.102693	0.359068	-0.0487516
	Sample 478	0.575847	0.574107	0.330598	0.0937442	0.0539823	0.196412	0.113103	0.272267	-0.0371844
	Sample 479	0.483257	0.366894	0.177304	0.138291	0.0668301	0.38149	0.184358	0.319885	-0.081329
	Sample 480	0.572341	0.535676	0.30659	0.135286	0.0774299	0.205485	0.117607	0.297483	-0.0417237
	Sample 481	0.470402	0.42882	0.201718	0.187925	0.0884004	0.24454	0.115032	0.330871	-0.0632422
	Sample 482	0.521739	0.479816	0.250339	0.225939	0.117881	0.179972	0.0938984	0.316333	-0.0443898
	Sample 483	0.438055	0.47543	0.208265	0.0866363	0.0379515	0.31711	0.138912	0.355737	-0.0980001
	Sample 484	0.518375	0.506393	0.262501	0.214422	0.111151	0.164752	0.0854031	0.275593	-0.0821164
	Sample 485	0.521597	0.524409	0.27353	0.130734	0.0681905	0.238586	0.124446	0.308902	-0.0636208
	Sample 486	0.411453	0.460298	0.189391	0.184327	0.0758421	0.266968	0.109845	0.418342	-0.0872386
	Sample 487	0.487453	0.393186	0.19166	0.248119	0.120946	0.288146	0.140458	0.334766	-0.0658154
	Sample 488	0.540959	0.502564	0.271867	0.121679	0.0658234	0.249813	0.135139	0.276203	-0.0584522
	Sample 489	0.496559	0.468262	0.23252	0.196271	0.0974599	0.257353	0.127791	0.328721	-0.0963577
	Sample 490	0.464919	0.448721	0.208619	0.131069	0.0609366	0.293445	0.136428	0.378565	-0.0621884
	Sample 491	0.542864	0.458506	0.248906	0.172457	0.0936208	0.303672	0.164853	0.322683	-0.0550781
	Sample 492	0.460423	0.420094	0.193421	0.199035	0.0916404	0.277914	0.127958	0.358873	-0.0605842
	Sample 493	0.569977	0.432041	0.246253	0.117025	0.0667014	0.341956	0.194907	0.268335	-0.0469818
	Sample 494	0.55298	0.466157	0.257776	0.197333	0.109121	0.264516	0.146272	0.305026	-0.0354794
	Sample 495	0.551503	0.498433	0.274888	0.172558	0.0951661	0.236497	0.130429	0.306601	-0.0778505
	Sample 496	0.500038	0.538622	0.269332	0.114116	0.0570622	0.213139	0.106577	0.316613	-0.0648343
	Sample 497	0.447602	0.479916	0.214811	0.167707	0.0750657	0.236418	0.105821	0.382157	-0.044546
	Sample 498	0.538603	0.407215	0.219327	0.187043	0.100742	0.303593	0.163516	0.288281	-0.0747434
	Sample 499	0.572993	0.480825	0.275509	0.1593	0.0912779	0.240259	0.137667	0.264092	-0.0438712
	Outer Loadings
		Original Sample (O)	Sample Mean (M)	Standard Deviation (STDEV)	T Statistics (|O/STDEV|)	P Values
	CS * WOM <- WOMxCS	1.30721	1.30091	0.0660231	19.7993	5.68434e-14
	CS25 <- CS	0.885873	0.885789	0.0107925	82.0823	5.68434e-14
	CS26 <- CS	0.85448	0.853906	0.0155845	54.8287	5.68434e-14
	CS27 <- CS	0.857106	0.856578	0.0168895	50.7478	5.68434e-14
	FQ10 <- FQ	0.722659	0.725251	0.0285715	25.293	5.68434e-14
	FQ11 <- FQ	0.739756	0.738022	0.0212288	34.8468	5.68434e-14
	FQ12 <- FQ	0.770906	0.772212	0.0177273	43.4871	5.68434e-14
	FQ13 <- FQ	0.773257	0.770945	0.0240964	32.0902	5.68434e-14
	FQ8 <- FQ	0.769479	0.768789	0.0258276	29.7929	5.68434e-14
	FQ9 <- FQ	0.733145	0.731405	0.0251785	29.1179	5.68434e-14
	PEQ20 <- PEQ	0.764223	0.761395	0.0269743	28.3315	5.68434e-14
	PEQ21 <- PEQ	0.87294	0.872842	0.0125186	69.7313	5.68434e-14
	PEQ23 <- PEQ	0.804636	0.805279	0.0204521	39.3425	5.68434e-14
	RI32 <- RVI	0.886979	0.886556	0.0128534	69.0071	5.68434e-14
	RI33 <- RVI	0.916385	0.916994	0.00877036	104.487	5.68434e-14
	RI34 <- RVI	0.895103	0.895491	0.0110128	81.2786	5.68434e-14
	RI35 <- RVI	0.878447	0.877587	0.0160644	54.6828	5.68434e-14
	RSQ16 <- RSQ	0.712932	0.711066	0.034894	20.4314	5.68434e-14
	RSQ17 <- RSQ	0.830452	0.830303	0.0144256	57.5679	5.68434e-14
	RSQ18 <- RSQ	0.830118	0.829939	0.0198004	41.9243	5.68434e-14
	RSQ19 <- RSQ	0.765762	0.765978	0.0214702	35.6663	5.68434e-14
	WOM28 <- WOM	0.812821	0.812874	0.0171677	47.3459	5.68434e-14
	WOM29 <- WOM	0.843823	0.843146	0.0140441	60.0838	5.68434e-14
	WOM30 <- WOM	0.847313	0.847727	0.0175405	48.306	5.68434e-14
	WOM31 <- WOM	0.796435	0.7977	0.0189069	42.124	5.68434e-14
	Confidence Intervals
		Original Sample (O)	Sample Mean (M)	2.5%	97.5%
	CS * WOM <- WOMxCS	1.30721	1.30091	1.17082	1.43846
	CS25 <- CS	0.885873	0.885789	0.862499	0.905574
	CS26 <- CS	0.85448	0.853906	0.817981	0.880524
	CS27 <- CS	0.857106	0.856578	0.818703	0.884792
	FQ10 <- FQ	0.722659	0.725251	0.662195	0.775378
	FQ11 <- FQ	0.739756	0.738022	0.689744	0.774991
	FQ12 <- FQ	0.770906	0.772212	0.734859	0.803364
	FQ13 <- FQ	0.773257	0.770945	0.721137	0.814988
	FQ8 <- FQ	0.769479	0.768789	0.714338	0.814278
	FQ9 <- FQ	0.733145	0.731405	0.679311	0.777814
	PEQ20 <- PEQ	0.764223	0.761395	0.705001	0.808291
	PEQ21 <- PEQ	0.87294	0.872842	0.844952	0.895035
	PEQ23 <- PEQ	0.804636	0.805279	0.762819	0.842284
	RI32 <- RVI	0.886979	0.886556	0.858725	0.909874
	RI33 <- RVI	0.916385	0.916994	0.899195	0.93335
	RI34 <- RVI	0.895103	0.895491	0.87248	0.914219
	RI35 <- RVI	0.878447	0.877587	0.840598	0.906438
	RSQ16 <- RSQ	0.712932	0.711066	0.639927	0.769228
	RSQ17 <- RSQ	0.830452	0.830303	0.800227	0.857707
	RSQ18 <- RSQ	0.830118	0.829939	0.784996	0.863734
	RSQ19 <- RSQ	0.765762	0.765978	0.722348	0.807979
	WOM28 <- WOM	0.812821	0.812874	0.774734	0.844118
	WOM29 <- WOM	0.843823	0.843146	0.814454	0.867697
	WOM30 <- WOM	0.847313	0.847727	0.808613	0.877658
	WOM31 <- WOM	0.796435	0.7977	0.758062	0.830965
	Confidence Intervals Bias Corrected
		Original Sample (O)	Sample Mean (M)	Bias	2.5%	97.5%
	CS * WOM <- WOMxCS	1.30721	1.30091	-0.00630427	1.19226	1.45513
	CS25 <- CS	0.885873	0.885789	-8.34701e-05	0.862499	0.905574
	CS26 <- CS	0.85448	0.853906	-0.000573914	0.814986	0.880016
	CS27 <- CS	0.857106	0.856578	-0.000528161	0.818423	0.884399
	FQ10 <- FQ	0.722659	0.725251	0.00259248	0.658283	0.77178
	FQ11 <- FQ	0.739756	0.738022	-0.00173417	0.696412	0.776788
	FQ12 <- FQ	0.770906	0.772212	0.00130548	0.730207	0.799073
	FQ13 <- FQ	0.773257	0.770945	-0.00231144	0.721173	0.81759
	FQ8 <- FQ	0.769479	0.768789	-0.000689948	0.713237	0.814237
	FQ9 <- FQ	0.733145	0.731405	-0.00174045	0.679277	0.775643
	PEQ20 <- PEQ	0.764223	0.761395	-0.00282834	0.708714	0.809631
	PEQ21 <- PEQ	0.87294	0.872842	-9.84884e-05	0.83999	0.891256
	PEQ23 <- PEQ	0.804636	0.805279	0.00064297	0.757129	0.835395
	RI32 <- RVI	0.886979	0.886556	-0.000422701	0.856997	0.908532
	RI33 <- RVI	0.916385	0.916994	0.000608694	0.896855	0.932073
	RI34 <- RVI	0.895103	0.895491	0.000387987	0.866596	0.911881
	RI35 <- RVI	0.878447	0.877587	-0.000859518	0.840598	0.906438
	RSQ16 <- RSQ	0.712932	0.711066	-0.0018658	0.636694	0.769191
	RSQ17 <- RSQ	0.830452	0.830303	-0.000149134	0.799236	0.85483
	RSQ18 <- RSQ	0.830118	0.829939	-0.000179204	0.774356	0.860661
	RSQ19 <- RSQ	0.765762	0.765978	0.000215498	0.722348	0.807979
	WOM28 <- WOM	0.812821	0.812874	5.39176e-05	0.773487	0.84368
	WOM29 <- WOM	0.843823	0.843146	-0.000676564	0.814454	0.867697
	WOM30 <- WOM	0.847313	0.847727	0.000414382	0.807262	0.876202
	WOM31 <- WOM	0.796435	0.7977	0.00126472	0.7534	0.827479
	Samples
		CS * WOM <- WOMxCS	CS25 <- CS	CS26 <- CS	CS27 <- CS	FQ10 <- FQ	FQ11 <- FQ	FQ12 <- FQ	FQ13 <- FQ	FQ8 <- FQ	FQ9 <- FQ	PEQ20 <- PEQ	PEQ21 <- PEQ	PEQ23 <- PEQ	RI32 <- RVI	RI33 <- RVI	RI34 <- RVI	RI35 <- RVI	RSQ16 <- RSQ	RSQ17 <- RSQ	RSQ18 <- RSQ	RSQ19 <- RSQ	WOM28 <- WOM	WOM29 <- WOM	WOM30 <- WOM	WOM31 <- WOM
	Sample 0	1.2936	0.89198	0.848279	0.836417	0.728343	0.73957	0.738623	0.778365	0.766399	0.762107	0.734379	0.866703	0.805174	0.875513	0.921271	0.892337	0.893895	0.695847	0.845131	0.817963	0.727617	0.820961	0.831673	0.833439	0.765768
	Sample 1	1.32297	0.883441	0.851389	0.865264	0.720225	0.733044	0.772199	0.822319	0.783667	0.739396	0.728524	0.866024	0.807527	0.872409	0.915363	0.89652	0.862315	0.677978	0.842565	0.844214	0.769598	0.810665	0.838271	0.833513	0.812879
	Sample 2	1.3684	0.875841	0.856918	0.85783	0.689296	0.753899	0.772673	0.776221	0.780678	0.738896	0.788485	0.88571	0.733885	0.89542	0.919238	0.888462	0.892708	0.760489	0.824704	0.858254	0.751974	0.828765	0.844148	0.84361	0.811022
	Sample 3	1.29843	0.88933	0.863989	0.860806	0.717436	0.727695	0.794153	0.758256	0.767907	0.711063	0.789219	0.885254	0.812667	0.902777	0.918865	0.909473	0.880067	0.711954	0.828687	0.818283	0.752336	0.831955	0.846722	0.847024	0.800932
	Sample 4	1.2369	0.881458	0.863348	0.869593	0.774643	0.74327	0.785023	0.777784	0.768446	0.718535	0.726138	0.882072	0.831612	0.870174	0.914616	0.896909	0.88684	0.722578	0.831869	0.826499	0.763979	0.804374	0.844667	0.852972	0.795315
	Sample 5	1.24805	0.889209	0.868128	0.852444	0.769308	0.738384	0.766386	0.769158	0.809107	0.716727	0.754003	0.886623	0.83854	0.890321	0.916563	0.897932	0.881225	0.745418	0.85483	0.809415	0.79911	0.805936	0.845552	0.877894	0.804176
	Sample 6	1.37789	0.894987	0.858363	0.836054	0.730309	0.756744	0.757102	0.79088	0.780433	0.759741	0.714614	0.86428	0.811954	0.897616	0.921086	0.882067	0.888045	0.706088	0.81517	0.853875	0.735294	0.789853	0.854827	0.821025	0.799185
	Sample 7	1.17082	0.87274	0.826945	0.828876	0.658662	0.729714	0.747499	0.729174	0.745405	0.692514	0.77769	0.854887	0.767253	0.880597	0.922822	0.893118	0.874858	0.664546	0.836142	0.799874	0.76415	0.810309	0.830078	0.844917	0.783915
	Sample 8	1.3129	0.8841	0.864035	0.84528	0.707967	0.758726	0.759616	0.769778	0.760189	0.75804	0.737471	0.86986	0.809525	0.8938	0.917854	0.890778	0.879231	0.666407	0.826972	0.809367	0.786321	0.806063	0.82626	0.853034	0.772465
	Sample 9	1.26944	0.875986	0.869089	0.846198	0.690008	0.744447	0.777664	0.787373	0.798697	0.766399	0.719779	0.884265	0.829373	0.895278	0.92202	0.871872	0.868315	0.71183	0.846464	0.802896	0.767675	0.811355	0.8595	0.828977	0.768861
	Sample 10	1.41185	0.890428	0.838101	0.831742	0.67355	0.751243	0.77558	0.785771	0.749325	0.727045	0.762698	0.88027	0.808346	0.888703	0.919384	0.89578	0.884904	0.726842	0.839659	0.845118	0.79711	0.811503	0.844196	0.846164	0.808746
	Sample 11	1.21038	0.886026	0.825537	0.838873	0.683755	0.727888	0.730121	0.743918	0.712868	0.688571	0.756277	0.847797	0.7938	0.879696	0.908458	0.877662	0.851733	0.596481	0.823942	0.797553	0.722348	0.783357	0.833094	0.816011	0.760667
	Sample 12	1.30237	0.888554	0.846685	0.826525	0.683887	0.752024	0.780202	0.806475	0.765131	0.749877	0.757978	0.875924	0.823462	0.887973	0.904955	0.871021	0.879608	0.717836	0.809881	0.845846	0.778786	0.795207	0.844549	0.82054	0.773188
	Sample 13	1.27474	0.866058	0.803583	0.857615	0.692791	0.727418	0.733732	0.770044	0.749752	0.67122	0.741474	0.83999	0.768521	0.874332	0.893911	0.863873	0.853593	0.729025	0.812347	0.788114	0.767653	0.828836	0.817192	0.829243	0.818626
	Sample 14	1.22997	0.901056	0.863927	0.858905	0.714425	0.770456	0.785953	0.757687	0.830962	0.738423	0.775028	0.861431	0.804825	0.890672	0.936306	0.899981	0.882791	0.704624	0.837256	0.822243	0.758683	0.807483	0.849228	0.836226	0.810239
	Sample 15	1.38858	0.873839	0.840368	0.876923	0.744583	0.732231	0.7454	0.802877	0.744849	0.73768	0.777408	0.872012	0.809125	0.875801	0.904977	0.884364	0.878732	0.716606	0.821746	0.835028	0.740865	0.809944	0.862338	0.85921	0.807922
	Sample 16	1.33835	0.890082	0.880775	0.868762	0.723873	0.749217	0.778499	0.792601	0.785048	0.783965	0.807454	0.888768	0.828408	0.903626	0.92093	0.914525	0.886018	0.76149	0.835921	0.853458	0.781986	0.82547	0.867458	0.883806	0.821337
	Sample 17	1.24088	0.88219	0.845877	0.822478	0.630615	0.721352	0.776829	0.724146	0.715735	0.675953	0.75405	0.866202	0.779177	0.889449	0.916626	0.890427	0.863648	0.641394	0.804243	0.813043	0.772374	0.795391	0.841045	0.821866	0.803706
	Sample 18	1.3168	0.898613	0.86437	0.877345	0.70871	0.745809	0.780666	0.766514	0.783011	0.732744	0.76663	0.864693	0.816961	0.897701	0.928147	0.919096	0.900086	0.70476	0.816802	0.85094	0.767009	0.811481	0.839521	0.859977	0.820695
	Sample 19	1.27068	0.882525	0.850112	0.87413	0.730406	0.74008	0.76204	0.756536	0.753705	0.730184	0.794563	0.870604	0.810064	0.896349	0.923198	0.898431	0.880762	0.71593	0.846648	0.839849	0.795101	0.82628	0.861813	0.858294	0.820572
	Sample 20	1.33873	0.867389	0.848519	0.809546	0.676672	0.730418	0.778227	0.801689	0.798672	0.6954	0.762952	0.892075	0.833926	0.878668	0.920698	0.86276	0.830278	0.704218	0.856705	0.835036	0.792293	0.813754	0.845329	0.839393	0.743252
	Sample 21	1.28188	0.898727	0.875599	0.844425	0.694404	0.750045	0.773899	0.799596	0.768242	0.756174	0.811051	0.901808	0.819812	0.889207	0.926492	0.9019	0.889531	0.759688	0.858285	0.833773	0.771509	0.814073	0.849474	0.857694	0.792471
	Sample 22	1.26446	0.883613	0.822885	0.854538	0.734812	0.703601	0.750089	0.769452	0.72717	0.668674	0.721586	0.842931	0.799389	0.872252	0.925358	0.907661	0.850756	0.678513	0.801925	0.781648	0.743679	0.828899	0.844127	0.825817	0.809923
	Sample 23	1.34386	0.878301	0.846794	0.845209	0.70409	0.731601	0.791841	0.739639	0.772413	0.704945	0.740149	0.861002	0.77387	0.897764	0.910449	0.888156	0.898589	0.715235	0.793296	0.841623	0.744789	0.781991	0.81115	0.842719	0.805116
	Sample 24	1.28431	0.869943	0.848493	0.874626	0.733736	0.780842	0.780828	0.795619	0.799756	0.715863	0.786578	0.859244	0.802196	0.883314	0.901917	0.889617	0.88025	0.732989	0.83816	0.839537	0.776329	0.791005	0.847323	0.824748	0.796978
	Sample 25	1.24071	0.884048	0.879957	0.861949	0.727686	0.752602	0.751862	0.748835	0.77502	0.737441	0.72156	0.879323	0.793469	0.887035	0.92114	0.910942	0.895774	0.703379	0.830526	0.833196	0.746995	0.81857	0.857184	0.841564	0.815607
	Sample 26	1.30278	0.905657	0.853463	0.875265	0.711	0.740746	0.783326	0.780683	0.778175	0.722369	0.809159	0.888162	0.80905	0.887838	0.914969	0.904693	0.874674	0.762479	0.83789	0.842212	0.763204	0.821856	0.851283	0.848068	0.813831
	Sample 27	1.26462	0.893346	0.847066	0.872411	0.746782	0.723472	0.784306	0.779983	0.767916	0.737619	0.765447	0.890657	0.833277	0.891105	0.916745	0.900078	0.902549	0.737464	0.821276	0.856221	0.750441	0.818393	0.857784	0.859394	0.843124
	Sample 28	1.20868	0.886294	0.860922	0.86259	0.716662	0.741856	0.775333	0.733294	0.759168	0.700251	0.738544	0.863629	0.802273	0.898367	0.916784	0.903752	0.884072	0.731723	0.846116	0.841979	0.773531	0.809566	0.859675	0.88352	0.821764
	Sample 29	1.26203	0.897742	0.86786	0.856982	0.691385	0.743761	0.802999	0.803178	0.794375	0.762896	0.810743	0.891256	0.780195	0.878269	0.915314	0.902259	0.873336	0.709293	0.833234	0.843497	0.769125	0.80716	0.852674	0.830676	0.814364
	Sample 30	1.31543	0.892333	0.879507	0.871011	0.768292	0.7818	0.758197	0.806108	0.780657	0.767457	0.782178	0.874171	0.816969	0.902534	0.916203	0.904287	0.881982	0.772452	0.84337	0.839296	0.75504	0.823263	0.840474	0.854495	0.795731
	Sample 31	1.27692	0.883459	0.851832	0.864018	0.699935	0.752696	0.796623	0.760457	0.776595	0.760211	0.779298	0.874788	0.80286	0.892646	0.916148	0.895682	0.873812	0.731689	0.850768	0.832102	0.734294	0.831854	0.847542	0.86256	0.810618
	Sample 32	1.31281	0.875443	0.850807	0.819209	0.652011	0.720359	0.756589	0.785094	0.750761	0.705762	0.705886	0.87613	0.809072	0.893291	0.91709	0.883882	0.877084	0.677466	0.831455	0.813058	0.769171	0.816907	0.834773	0.836242	0.770947
	Sample 33	1.3265	0.873727	0.854632	0.854659	0.716801	0.761122	0.781925	0.79749	0.814237	0.717992	0.803722	0.875393	0.808	0.892127	0.919994	0.912111	0.886968	0.750728	0.847238	0.854908	0.779585	0.809636	0.860753	0.849617	0.803894
	Sample 34	1.40132	0.872289	0.841807	0.869175	0.756904	0.732471	0.777733	0.779448	0.773468	0.767392	0.763173	0.873397	0.766194	0.883817	0.907373	0.899117	0.879042	0.735899	0.817405	0.823139	0.755326	0.811886	0.825421	0.870336	0.806025
	Sample 35	1.23137	0.880677	0.852115	0.867081	0.730821	0.729383	0.805981	0.758446	0.752669	0.734092	0.785226	0.896034	0.804936	0.892645	0.924912	0.891216	0.890669	0.730828	0.828143	0.852903	0.788819	0.802546	0.850502	0.84989	0.807292
	Sample 36	1.37689	0.881582	0.825615	0.850824	0.703402	0.758877	0.788113	0.75575	0.75298	0.712341	0.727724	0.873846	0.812263	0.892137	0.90789	0.905383	0.887462	0.708076	0.823907	0.841082	0.751276	0.824074	0.839778	0.852695	0.787249
	Sample 37	1.24833	0.888502	0.876343	0.849945	0.744636	0.763092	0.799726	0.790471	0.778209	0.801535	0.797589	0.871567	0.793359	0.888075	0.921719	0.905447	0.885434	0.759679	0.86377	0.860633	0.75379	0.810504	0.842358	0.876202	0.801888
	Sample 38	1.41726	0.884568	0.868803	0.848885	0.712688	0.716761	0.760235	0.799847	0.802059	0.74227	0.783311	0.867957	0.814335	0.887868	0.909196	0.89492	0.859373	0.698237	0.857707	0.813457	0.779826	0.80371	0.837474	0.84306	0.771879
	Sample 39	1.44906	0.880449	0.860617	0.839584	0.704054	0.75805	0.737024	0.746727	0.772108	0.744751	0.731329	0.866223	0.799816	0.887724	0.919739	0.88299	0.883846	0.769191	0.827284	0.847095	0.744053	0.805135	0.850974	0.858616	0.790976
	Sample 40	1.36603	0.896262	0.848298	0.858543	0.688763	0.755511	0.769711	0.752281	0.756208	0.720198	0.783162	0.87527	0.824597	0.889234	0.928505	0.907288	0.877357	0.719759	0.823839	0.829653	0.75814	0.825989	0.838215	0.837375	0.792173
	Sample 41	1.36467	0.862924	0.866249	0.830134	0.707518	0.738145	0.763955	0.77485	0.800601	0.70842	0.705001	0.872055	0.82059	0.881931	0.909522	0.88837	0.868682	0.659915	0.83323	0.81034	0.764001	0.792704	0.826986	0.821339	0.759566
	Sample 42	1.31132	0.883897	0.872883	0.840489	0.721468	0.71839	0.778448	0.780099	0.775495	0.736313	0.72836	0.887824	0.802655	0.881802	0.933101	0.886809	0.906021	0.675571	0.85293	0.837339	0.810058	0.78734	0.834727	0.854171	0.80754
	Sample 43	1.34904	0.888254	0.865815	0.840724	0.743327	0.761927	0.751259	0.806207	0.804481	0.737636	0.772394	0.852895	0.818622	0.870859	0.922552	0.892076	0.87042	0.724883	0.843932	0.807278	0.786451	0.803797	0.84616	0.818025	0.795671
	Sample 44	1.21748	0.878526	0.835131	0.866876	0.742418	0.67026	0.754208	0.777306	0.758167	0.674897	0.679429	0.857552	0.817984	0.860845	0.91785	0.909841	0.86845	0.671407	0.817427	0.815465	0.745306	0.810783	0.857554	0.826434	0.799757
	Sample 45	1.31795	0.894681	0.851951	0.81892	0.714233	0.750989	0.772105	0.762105	0.763551	0.733579	0.746142	0.872448	0.825404	0.895763	0.917444	0.888081	0.88517	0.732087	0.830767	0.855562	0.767722	0.806905	0.856037	0.865328	0.773848
	Sample 46	1.35066	0.884325	0.862719	0.863139	0.684003	0.751963	0.796535	0.800991	0.805876	0.752635	0.78756	0.875386	0.83516	0.855816	0.907092	0.887936	0.834507	0.724083	0.831329	0.827975	0.752854	0.824999	0.838187	0.883143	0.80385
	Sample 47	1.29079	0.884374	0.845738	0.850067	0.708178	0.705295	0.789343	0.760955	0.762836	0.716089	0.745731	0.88391	0.806851	0.880549	0.921734	0.910672	0.88201	0.74943	0.832436	0.829041	0.752837	0.824994	0.849903	0.864244	0.8187
	Sample 48	1.28359	0.904143	0.881327	0.876148	0.744172	0.771406	0.798265	0.759826	0.793758	0.759414	0.748155	0.884193	0.795201	0.907032	0.922825	0.911881	0.910885	0.687556	0.82844	0.860828	0.77046	0.813466	0.839548	0.836877	0.802727
	Sample 49	1.2497	0.866516	0.864656	0.870022	0.754004	0.757898	0.756892	0.776275	0.78063	0.761583	0.748431	0.881203	0.828058	0.853597	0.903142	0.883843	0.867499	0.694432	0.834036	0.80929	0.780087	0.779704	0.838653	0.838863	0.792548
	Sample 50	1.25566	0.886981	0.830233	0.871262	0.740881	0.661103	0.787283	0.755953	0.733777	0.721562	0.78646	0.870454	0.771795	0.864458	0.913093	0.891059	0.841276	0.694834	0.831971	0.830709	0.781712	0.825813	0.850557	0.849721	0.817734
	Sample 51	1.20274	0.869345	0.823203	0.848554	0.739165	0.735987	0.759033	0.770113	0.764721	0.722089	0.75998	0.870124	0.790353	0.890071	0.9144	0.891526	0.864878	0.693212	0.850323	0.833976	0.757741	0.809945	0.839423	0.818865	0.783999
	Sample 52	1.26049	0.890198	0.870464	0.869747	0.729777	0.743869	0.774105	0.761946	0.719994	0.734279	0.748587	0.87624	0.820398	0.89457	0.934516	0.908968	0.884218	0.668608	0.841347	0.836588	0.785408	0.850826	0.867246	0.877658	0.799138
	Sample 53	1.34474	0.885775	0.845277	0.871102	0.769948	0.738604	0.773643	0.827641	0.79506	0.750214	0.770757	0.869733	0.822908	0.868894	0.898887	0.888075	0.840598	0.76338	0.823021	0.809254	0.785695	0.831183	0.848028	0.828912	0.794336
	Sample 54	1.29121	0.881384	0.86217	0.854872	0.724748	0.759889	0.793933	0.775487	0.808468	0.732034	0.80741	0.88123	0.796023	0.873426	0.909116	0.894885	0.877221	0.72038	0.828868	0.812046	0.761952	0.814302	0.83039	0.845046	0.776353
	Sample 55	1.36494	0.890552	0.838153	0.86214	0.739268	0.729339	0.739148	0.819345	0.767673	0.752897	0.708714	0.883569	0.832935	0.895611	0.904543	0.88987	0.881057	0.702969	0.832119	0.817179	0.761545	0.823361	0.836687	0.834916	0.824296
	Sample 56	1.23663	0.892637	0.858542	0.832655	0.700976	0.701042	0.780324	0.802669	0.767295	0.751175	0.782439	0.883656	0.843828	0.884167	0.931087	0.899331	0.857488	0.758487	0.838886	0.865905	0.764183	0.856684	0.882951	0.882776	0.784861
	Sample 57	1.21679	0.889849	0.834608	0.847158	0.667696	0.750272	0.761121	0.765451	0.765108	0.730205	0.735615	0.881187	0.794206	0.895365	0.91133	0.880735	0.891908	0.653223	0.82649	0.812442	0.79175	0.794747	0.835366	0.775404	0.813701
	Sample 58	1.26716	0.89183	0.891398	0.859081	0.689249	0.765105	0.774762	0.749938	0.786603	0.743628	0.808291	0.896757	0.777388	0.892877	0.93335	0.901221	0.895693	0.729555	0.830688	0.863575	0.77303	0.801523	0.858826	0.842338	0.803164
	Sample 59	1.3134	0.885184	0.823869	0.822784	0.679238	0.728936	0.75573	0.772657	0.717468	0.733696	0.761704	0.873783	0.753353	0.877401	0.90109	0.891459	0.849332	0.725208	0.825302	0.841299	0.764719	0.803439	0.83093	0.843326	0.772969
	Sample 60	1.27712	0.887877	0.866112	0.855801	0.723534	0.720347	0.765191	0.781105	0.751611	0.750225	0.744406	0.857123	0.806893	0.901912	0.920667	0.890106	0.867954	0.666797	0.836021	0.848628	0.776576	0.814045	0.851026	0.840077	0.801781
	Sample 61	1.3084	0.899519	0.861216	0.879435	0.736903	0.756058	0.797706	0.769632	0.783804	0.761183	0.749218	0.882706	0.827221	0.896556	0.918565	0.897487	0.878083	0.67228	0.84607	0.811356	0.783195	0.792565	0.845719	0.80415	0.792295
	Sample 62	1.32921	0.890273	0.859642	0.868129	0.738677	0.756434	0.810607	0.799123	0.821673	0.761799	0.766593	0.871062	0.801564	0.8977	0.924233	0.903292	0.8841	0.711939	0.832984	0.856153	0.76678	0.803551	0.854835	0.850004	0.814279
	Sample 63	1.33438	0.874562	0.842858	0.864649	0.733066	0.758921	0.766735	0.741659	0.789092	0.684102	0.735338	0.863628	0.79141	0.8637	0.900379	0.909496	0.899829	0.694746	0.834665	0.807847	0.757093	0.834384	0.838667	0.863835	0.776309
	Sample 64	1.29182	0.893925	0.883128	0.856152	0.750653	0.780047	0.79524	0.781577	0.799492	0.765508	0.785224	0.890943	0.806622	0.8915	0.92445	0.903067	0.905163	0.755825	0.83441	0.836537	0.766081	0.833049	0.856758	0.859716	0.787511
	Sample 65	1.26717	0.889835	0.867583	0.866293	0.717379	0.782021	0.777508	0.760213	0.808231	0.754203	0.769949	0.874576	0.806479	0.910051	0.91856	0.895878	0.859173	0.7773	0.833907	0.833368	0.733314	0.832912	0.87212	0.867738	0.815545
	Sample 66	1.29729	0.887391	0.840272	0.861363	0.717085	0.728338	0.754714	0.792892	0.738615	0.761986	0.78894	0.872079	0.806562	0.896121	0.921636	0.898088	0.872564	0.739278	0.828927	0.828244	0.753176	0.847525	0.861163	0.855362	0.82801
	Sample 67	1.29198	0.884899	0.852655	0.865052	0.715952	0.71736	0.773763	0.749183	0.733971	0.686652	0.789115	0.895969	0.810453	0.884545	0.923427	0.903967	0.886909	0.75594	0.842597	0.843603	0.758655	0.816457	0.865598	0.8522	0.806951
	Sample 68	1.30271	0.88542	0.848625	0.851678	0.775378	0.722289	0.78256	0.767752	0.752684	0.716709	0.78008	0.891155	0.81711	0.899948	0.90969	0.903837	0.868604	0.746717	0.82856	0.828617	0.752233	0.819609	0.845093	0.837442	0.787875
	Sample 69	1.33444	0.880127	0.853353	0.866147	0.704407	0.748458	0.789198	0.79883	0.76965	0.733084	0.767163	0.872588	0.813776	0.875953	0.931405	0.913127	0.889116	0.683187	0.838641	0.84084	0.755967	0.796002	0.843003	0.838114	0.798162
	Sample 70	1.28782	0.897683	0.85585	0.840632	0.660779	0.767062	0.781648	0.789132	0.794977	0.748068	0.769231	0.866489	0.777998	0.894667	0.922651	0.892647	0.881303	0.709751	0.819395	0.840578	0.71481	0.820107	0.828561	0.839471	0.773584
	Sample 71	1.25376	0.874163	0.811791	0.862608	0.709965	0.720077	0.781749	0.761512	0.765176	0.73011	0.758118	0.847154	0.781561	0.874512	0.915411	0.88991	0.856664	0.684801	0.831133	0.841869	0.737892	0.797995	0.854228	0.844249	0.794875
	Sample 72	1.32098	0.885302	0.853191	0.887968	0.778725	0.735751	0.794656	0.8246	0.829688	0.789869	0.78519	0.890737	0.82072	0.896079	0.904795	0.892589	0.876595	0.767968	0.830461	0.856045	0.783044	0.836158	0.847842	0.870725	0.824852
	Sample 73	1.28873	0.896462	0.847567	0.853261	0.696264	0.716531	0.788397	0.768953	0.745202	0.714114	0.751103	0.863828	0.771085	0.890546	0.91994	0.90148	0.88455	0.66185	0.826231	0.808017	0.78415	0.84023	0.822983	0.856263	0.799766
	Sample 74	1.29337	0.884163	0.855741	0.856961	0.709889	0.734518	0.796333	0.798574	0.777712	0.722258	0.725474	0.874009	0.816912	0.879547	0.929993	0.903019	0.884131	0.721258	0.843674	0.832853	0.784799	0.829289	0.85842	0.844967	0.805658
	Sample 75	1.30708	0.900061	0.854233	0.875075	0.758658	0.736293	0.781711	0.76622	0.759411	0.765911	0.778443	0.899005	0.823481	0.904725	0.912093	0.916057	0.889797	0.682001	0.848401	0.83091	0.787689	0.813478	0.829678	0.863459	0.821927
	Sample 76	1.37857	0.894857	0.85762	0.856697	0.726762	0.753057	0.792803	0.794787	0.7758	0.785175	0.786063	0.875104	0.779366	0.905147	0.918579	0.916252	0.901645	0.67709	0.860117	0.868541	0.779724	0.837118	0.851671	0.851124	0.789219
	Sample 77	1.34859	0.897407	0.865037	0.841707	0.662475	0.756384	0.770301	0.783048	0.746462	0.732251	0.709951	0.861271	0.771168	0.89848	0.915747	0.885976	0.882678	0.650336	0.829985	0.846954	0.770432	0.776221	0.81868	0.814276	0.763021
	Sample 78	1.21864	0.881863	0.846567	0.854722	0.732337	0.750318	0.777275	0.776281	0.78613	0.729101	0.756326	0.880303	0.827639	0.892317	0.900538	0.88114	0.854277	0.734722	0.807039	0.830968	0.737066	0.839536	0.837062	0.846765	0.816431
	Sample 79	1.31418	0.887367	0.837552	0.857875	0.707224	0.748435	0.793606	0.776253	0.79687	0.711438	0.754057	0.875121	0.8187	0.893768	0.902227	0.908605	0.872035	0.72206	0.834328	0.835954	0.776854	0.808293	0.850117	0.862069	0.805587
	Sample 80	1.14578	0.903242	0.872754	0.86012	0.740801	0.755326	0.769822	0.768191	0.760752	0.750412	0.741673	0.873342	0.844309	0.89434	0.929714	0.899585	0.887393	0.661928	0.817266	0.787126	0.789371	0.823517	0.868993	0.859471	0.806178
	Sample 81	1.29713	0.883974	0.832448	0.863907	0.742911	0.756908	0.784083	0.769059	0.781949	0.741569	0.772426	0.878934	0.787201	0.895609	0.91109	0.908296	0.871434	0.713984	0.829382	0.837262	0.763867	0.807855	0.831235	0.848929	0.815356
	Sample 82	1.22338	0.868188	0.831231	0.874385	0.684873	0.683944	0.764822	0.753887	0.706865	0.652508	0.749572	0.864172	0.809918	0.842957	0.906185	0.871605	0.839471	0.710331	0.825747	0.835078	0.765334	0.829205	0.839849	0.841373	0.793106
	Sample 83	1.34692	0.896221	0.852316	0.886	0.751962	0.7315	0.764153	0.751745	0.766052	0.720758	0.719801	0.880857	0.822863	0.898318	0.911912	0.90698	0.867697	0.735223	0.842364	0.815258	0.771967	0.824782	0.836909	0.868633	0.805529
	Sample 84	1.45671	0.880065	0.841082	0.836791	0.717055	0.714215	0.771537	0.754756	0.747268	0.68169	0.746152	0.873589	0.760904	0.888589	0.932868	0.896357	0.878783	0.747113	0.803889	0.839035	0.733468	0.80035	0.840805	0.829214	0.788236
	Sample 85	1.3151	0.887318	0.8544	0.867326	0.722244	0.756285	0.790987	0.780401	0.798356	0.75503	0.772376	0.858981	0.817897	0.892507	0.908066	0.888124	0.870557	0.713041	0.804347	0.816252	0.782901	0.813896	0.848757	0.83864	0.802261
	Sample 86	1.25479	0.896089	0.820691	0.873001	0.721779	0.709468	0.782537	0.72359	0.776519	0.683323	0.739532	0.861845	0.781124	0.865161	0.900269	0.887302	0.883188	0.626197	0.810118	0.845082	0.768378	0.808926	0.806856	0.819487	0.802462
	Sample 87	1.27066	0.884808	0.880016	0.870837	0.673275	0.748	0.785958	0.799414	0.75925	0.732036	0.784563	0.892239	0.821626	0.888453	0.918894	0.891238	0.882866	0.686716	0.832805	0.808645	0.792299	0.822608	0.841439	0.835581	0.780596
	Sample 88	1.42946	0.874575	0.840875	0.823385	0.706712	0.762581	0.735722	0.785285	0.782238	0.77976	0.792911	0.866402	0.802705	0.889223	0.928633	0.879138	0.874127	0.728744	0.838961	0.839977	0.756826	0.798696	0.861509	0.849156	0.767564
	Sample 89	1.27851	0.895322	0.86336	0.861004	0.765566	0.743554	0.79055	0.796039	0.810585	0.739848	0.79371	0.882475	0.818493	0.89958	0.90871	0.892805	0.8702	0.716795	0.853667	0.829698	0.800491	0.802448	0.837672	0.8675	0.786735
	Sample 90	1.25373	0.896559	0.869756	0.867151	0.73855	0.726318	0.774429	0.779437	0.76095	0.748821	0.76433	0.883583	0.844417	0.887329	0.931365	0.908725	0.89787	0.750454	0.841465	0.836258	0.773436	0.809329	0.874574	0.859524	0.780537
	Sample 91	1.25328	0.896073	0.855741	0.879835	0.762215	0.747178	0.789598	0.767664	0.792064	0.751167	0.769248	0.889858	0.809455	0.897436	0.918679	0.912488	0.906077	0.741908	0.830105	0.821229	0.764813	0.84061	0.836191	0.828245	0.810096
	Sample 92	1.27229	0.879668	0.859706	0.852003	0.740524	0.757287	0.746603	0.759894	0.78321	0.739872	0.742536	0.861127	0.83448	0.902137	0.910103	0.892716	0.887562	0.671289	0.838748	0.78934	0.807719	0.823535	0.837209	0.84686	0.778649
	Sample 93	1.35328	0.889646	0.858431	0.83965	0.662195	0.744437	0.769746	0.798587	0.763855	0.758798	0.749893	0.829755	0.809796	0.888408	0.910074	0.882445	0.877553	0.639927	0.852194	0.831381	0.815662	0.808041	0.839515	0.834131	0.787621
	Sample 94	1.3266	0.887337	0.863326	0.871504	0.725076	0.748688	0.76398	0.77377	0.781396	0.728102	0.725845	0.889563	0.818878	0.90777	0.929155	0.906091	0.900639	0.718675	0.835701	0.854344	0.770795	0.82156	0.847352	0.854227	0.814862
	Sample 95	1.44135	0.880101	0.84751	0.84491	0.713128	0.734215	0.778759	0.780471	0.710844	0.705745	0.759166	0.873757	0.785164	0.90449	0.907242	0.897181	0.899905	0.754099	0.815766	0.841302	0.743704	0.820679	0.831628	0.824155	0.812827
	Sample 96	1.26651	0.887889	0.837506	0.841216	0.697915	0.726642	0.785519	0.801478	0.795051	0.746017	0.772155	0.877157	0.769518	0.88153	0.929673	0.896273	0.869829	0.674196	0.856956	0.838288	0.731525	0.801376	0.84008	0.804839	0.814566
	Sample 97	1.3331	0.872165	0.864515	0.845101	0.724041	0.756017	0.785337	0.788152	0.793522	0.767508	0.793845	0.877204	0.800357	0.911709	0.919373	0.899856	0.907166	0.761781	0.845751	0.838138	0.772148	0.81966	0.844737	0.871569	0.797904
	Sample 98	1.2232	0.879838	0.856837	0.842015	0.685001	0.76216	0.764474	0.776589	0.77234	0.738784	0.731266	0.871257	0.834848	0.890586	0.926244	0.897665	0.888976	0.669056	0.839085	0.817262	0.774895	0.787919	0.846829	0.834058	0.784043
	Sample 99	1.28593	0.890294	0.863477	0.863795	0.761587	0.730508	0.777123	0.779969	0.778675	0.736499	0.747687	0.880312	0.829195	0.881504	0.918984	0.89514	0.884877	0.717217	0.851517	0.826816	0.791692	0.813463	0.853102	0.870276	0.819799
	Sample 100	1.23032	0.875297	0.842145	0.861103	0.712008	0.735308	0.805747	0.800361	0.785137	0.727484	0.748243	0.863009	0.765413	0.878307	0.905367	0.892174	0.836994	0.658125	0.836026	0.852715	0.771326	0.805035	0.82661	0.856984	0.804929
	Sample 101	1.3167	0.88697	0.866007	0.860448	0.720061	0.753838	0.774332	0.755384	0.775406	0.734149	0.737014	0.864919	0.815351	0.879547	0.92155	0.884469	0.859768	0.669425	0.819112	0.806742	0.776586	0.789844	0.844303	0.835685	0.816288
	Sample 102	1.17744	0.893758	0.858326	0.851595	0.674097	0.756471	0.788704	0.783102	0.759623	0.746835	0.803779	0.88837	0.815043	0.89009	0.932377	0.889636	0.863494	0.671905	0.822668	0.834632	0.80233	0.809026	0.86389	0.823669	0.808961
	Sample 103	1.3203	0.889465	0.87483	0.874755	0.736974	0.75495	0.799526	0.824169	0.783211	0.754802	0.784324	0.879426	0.810908	0.911294	0.913013	0.895739	0.890502	0.737207	0.838843	0.85132	0.810279	0.832066	0.843443	0.871301	0.823749
	Sample 104	1.36799	0.889013	0.844069	0.844844	0.706084	0.764108	0.766758	0.789039	0.790125	0.748027	0.772866	0.87646	0.80213	0.873423	0.920696	0.896134	0.885843	0.688378	0.829287	0.814586	0.773303	0.780539	0.830785	0.822787	0.801976
	Sample 105	1.33601	0.88892	0.851941	0.853686	0.719763	0.697492	0.779947	0.7634	0.719336	0.727948	0.744365	0.882117	0.80427	0.872258	0.925297	0.891522	0.888374	0.659997	0.845836	0.841629	0.78418	0.814361	0.831773	0.844709	0.791623
	Sample 106	1.25341	0.895292	0.864147	0.825659	0.679016	0.746449	0.761212	0.747936	0.728393	0.694461	0.762153	0.86926	0.798692	0.853584	0.91388	0.880765	0.850914	0.69073	0.820388	0.8183	0.758972	0.802604	0.857086	0.831427	0.735711
	Sample 107	1.44184	0.879723	0.833744	0.861679	0.731944	0.71872	0.764747	0.760267	0.75559	0.725054	0.7691	0.871497	0.815352	0.895881	0.912166	0.888918	0.878416	0.722594	0.834738	0.798125	0.74815	0.794005	0.85062	0.854471	0.77409
	Sample 108	1.23763	0.883423	0.865063	0.874345	0.765946	0.741727	0.766352	0.794831	0.802487	0.74067	0.724496	0.859329	0.81885	0.891814	0.934363	0.911695	0.895805	0.700937	0.842431	0.823586	0.774921	0.80971	0.849218	0.863295	0.807999
	Sample 109	1.37903	0.854378	0.806726	0.818423	0.693645	0.695514	0.755417	0.784404	0.728744	0.705786	0.803517	0.855354	0.778803	0.874169	0.902168	0.866596	0.827371	0.690003	0.819758	0.815128	0.766046	0.80954	0.856344	0.807262	0.793623
	Sample 110	1.25258	0.884189	0.884761	0.865219	0.748173	0.7674	0.798909	0.79662	0.797701	0.785167	0.775273	0.891239	0.810761	0.884241	0.930193	0.905263	0.877253	0.755796	0.839123	0.823747	0.788775	0.829067	0.836397	0.892661	0.833646
	Sample 111	1.05408	0.904467	0.868298	0.890303	0.7649	0.788177	0.756497	0.759203	0.807843	0.764386	0.700386	0.878195	0.828487	0.898402	0.922825	0.909956	0.867168	0.656429	0.84536	0.826617	0.760639	0.856526	0.84714	0.869072	0.829426
	Sample 112	1.27743	0.871689	0.841531	0.845569	0.688227	0.762075	0.766922	0.744399	0.748111	0.715675	0.805116	0.887515	0.797664	0.873291	0.912539	0.903474	0.894721	0.727891	0.834273	0.796011	0.791886	0.81131	0.846258	0.8514	0.801843
	Sample 113	1.26999	0.892329	0.826159	0.841932	0.720935	0.717059	0.772411	0.755334	0.756417	0.750787	0.769657	0.872364	0.764007	0.865723	0.918263	0.898949	0.893591	0.678851	0.798513	0.834079	0.741235	0.830187	0.81305	0.830225	0.819758
	Sample 114	1.26872	0.866274	0.852671	0.856699	0.716032	0.720653	0.748361	0.765362	0.716536	0.722605	0.762829	0.849908	0.801288	0.873476	0.91617	0.876941	0.848902	0.700714	0.832488	0.774641	0.770257	0.801335	0.858916	0.847264	0.789493
	Sample 115	1.343	0.907221	0.880106	0.85411	0.757042	0.77185	0.798397	0.790819	0.82651	0.759396	0.805496	0.889511	0.829924	0.915248	0.922028	0.898184	0.913172	0.789226	0.850183	0.853163	0.808691	0.817087	0.862808	0.86766	0.79275
	Sample 116	1.31179	0.893697	0.862605	0.875716	0.718952	0.746163	0.756415	0.786911	0.802712	0.69438	0.797823	0.873698	0.810112	0.888365	0.914812	0.907332	0.886257	0.74636	0.817977	0.819071	0.779478	0.830878	0.866126	0.854485	0.816442
	Sample 117	1.26258	0.903142	0.869218	0.836618	0.701923	0.77672	0.771356	0.788765	0.796954	0.703204	0.747713	0.856364	0.817568	0.881987	0.908666	0.872987	0.878738	0.71314	0.833228	0.819213	0.770368	0.804781	0.830669	0.798254	0.785423
	Sample 118	1.11003	0.908155	0.870118	0.842054	0.714253	0.726615	0.756777	0.725549	0.76946	0.71041	0.767435	0.867484	0.813199	0.873521	0.928793	0.905258	0.882961	0.738655	0.838452	0.793891	0.742982	0.811233	0.820419	0.847257	0.792321
	Sample 119	1.27112	0.87389	0.842178	0.857118	0.736131	0.717446	0.747466	0.733694	0.735764	0.725381	0.777033	0.862104	0.795261	0.867451	0.900487	0.892088	0.863304	0.719303	0.841854	0.817004	0.791919	0.788987	0.836069	0.865591	0.786385
	Sample 120	1.30221	0.880423	0.876673	0.879855	0.788659	0.765031	0.741747	0.762723	0.783207	0.748616	0.717128	0.866954	0.826802	0.881469	0.925295	0.904766	0.872636	0.740124	0.82347	0.821388	0.723813	0.805194	0.846798	0.860078	0.785178
	Sample 121	1.25813	0.900805	0.879513	0.88255	0.78358	0.768411	0.785855	0.814487	0.81828	0.787568	0.759749	0.874265	0.835311	0.906485	0.929843	0.91984	0.892589	0.762597	0.859618	0.823063	0.808687	0.827676	0.862013	0.869082	0.797549
	Sample 122	1.25013	0.895373	0.865871	0.861302	0.70312	0.765552	0.772635	0.774366	0.786305	0.753922	0.811843	0.864558	0.790493	0.886622	0.917727	0.909492	0.880111	0.701541	0.83688	0.842754	0.783695	0.82642	0.829814	0.850062	0.811736
	Sample 123	1.34754	0.899434	0.867409	0.860082	0.759633	0.738142	0.777033	0.756545	0.750347	0.717828	0.784447	0.890257	0.847089	0.883244	0.924652	0.897584	0.90131	0.682587	0.846075	0.828018	0.773707	0.813442	0.850282	0.861585	0.7886
	Sample 124	1.34394	0.884716	0.860389	0.838187	0.743289	0.742921	0.746458	0.77209	0.799764	0.766689	0.728967	0.871273	0.785584	0.867112	0.899554	0.885412	0.873944	0.700057	0.852785	0.826616	0.767006	0.808837	0.841849	0.836163	0.773019
	Sample 125	1.27868	0.880706	0.864309	0.871344	0.775893	0.750283	0.797831	0.762397	0.793979	0.77305	0.790084	0.880291	0.797502	0.89795	0.917549	0.914117	0.907677	0.727026	0.840866	0.810695	0.793084	0.837734	0.849011	0.870038	0.801354
	Sample 126	1.1991	0.870128	0.834253	0.841089	0.712925	0.734599	0.760239	0.755118	0.74314	0.692057	0.781505	0.867017	0.807965	0.899799	0.91963	0.883004	0.854711	0.710443	0.837717	0.803675	0.757697	0.811855	0.848041	0.857891	0.793929
	Sample 127	1.35194	0.866108	0.868168	0.84828	0.697182	0.786437	0.75468	0.790411	0.800544	0.742499	0.826954	0.879693	0.808276	0.880147	0.906517	0.889755	0.863724	0.755858	0.818506	0.828884	0.752438	0.813796	0.845815	0.838758	0.777331
	Sample 128	1.28517	0.897589	0.842716	0.87708	0.72948	0.730822	0.730207	0.721566	0.748868	0.745432	0.725507	0.882338	0.811203	0.8866	0.910774	0.89455	0.876159	0.711472	0.828926	0.831525	0.743032	0.809492	0.827978	0.850954	0.788128
	Sample 129	1.22938	0.901878	0.892535	0.889108	0.739146	0.759314	0.784528	0.73267	0.805551	0.73615	0.797612	0.876792	0.776159	0.899932	0.929339	0.927945	0.911253	0.761628	0.827777	0.84681	0.74053	0.837924	0.855257	0.862241	0.815689
	Sample 130	1.38588	0.90233	0.848898	0.856329	0.697608	0.761801	0.775064	0.760474	0.760924	0.712708	0.737144	0.886075	0.813	0.864682	0.908878	0.883314	0.86923	0.709077	0.826488	0.83113	0.766535	0.818683	0.817892	0.850981	0.78153
	Sample 131	1.25501	0.883919	0.820147	0.86299	0.732947	0.727747	0.766975	0.707897	0.735854	0.699021	0.762557	0.877877	0.764955	0.877801	0.913282	0.881709	0.874696	0.666211	0.842091	0.820116	0.768152	0.835646	0.827263	0.849207	0.79791
	Sample 132	1.1989	0.896904	0.854016	0.871828	0.772032	0.749078	0.773372	0.775656	0.748578	0.736544	0.748782	0.88191	0.823412	0.884021	0.920625	0.904894	0.910256	0.693117	0.825731	0.819339	0.790028	0.806127	0.828505	0.863761	0.789777
	Sample 133	1.30358	0.887377	0.842223	0.824207	0.685228	0.739768	0.771988	0.784173	0.766596	0.738841	0.713219	0.868175	0.833723	0.906061	0.928441	0.875508	0.821024	0.632902	0.821498	0.821893	0.775764	0.802945	0.850473	0.822593	0.761081
	Sample 134	1.27357	0.876652	0.841657	0.842998	0.723557	0.689744	0.767477	0.724633	0.750883	0.691293	0.759103	0.881119	0.787594	0.879555	0.908514	0.876562	0.85984	0.720604	0.820025	0.827938	0.708843	0.803467	0.848961	0.833046	0.813416
	Sample 135	1.19226	0.890276	0.874899	0.872952	0.781071	0.708636	0.764744	0.788299	0.775421	0.761385	0.719459	0.877167	0.850784	0.882033	0.925316	0.904493	0.884784	0.659384	0.838751	0.842562	0.763252	0.835153	0.866631	0.861143	0.812684
	Sample 136	1.27084	0.890984	0.853594	0.833282	0.703843	0.74313	0.777907	0.750883	0.808241	0.726994	0.736416	0.884541	0.801681	0.893763	0.922161	0.901971	0.884901	0.667445	0.836531	0.829202	0.725151	0.797523	0.850893	0.809605	0.783707
	Sample 137	1.3137	0.884867	0.84063	0.876101	0.754876	0.715131	0.753523	0.790872	0.764623	0.702963	0.762017	0.888866	0.833636	0.866737	0.916877	0.900124	0.885631	0.693271	0.846002	0.801651	0.79361	0.816938	0.85493	0.840604	0.817696
	Sample 138	1.38363	0.879708	0.873396	0.869024	0.758828	0.73826	0.775226	0.74828	0.774807	0.713207	0.788854	0.88928	0.788755	0.888999	0.932073	0.910252	0.882608	0.769314	0.84365	0.840262	0.739728	0.81874	0.852025	0.856968	0.781804
	Sample 139	1.43846	0.884567	0.846141	0.84722	0.729814	0.725901	0.782409	0.805373	0.76103	0.739485	0.765782	0.886912	0.81605	0.891131	0.918555	0.890325	0.872314	0.746248	0.845964	0.868886	0.768	0.808252	0.858239	0.857026	0.815041
	Sample 140	1.40832	0.893596	0.855355	0.858831	0.706106	0.772214	0.775261	0.761547	0.797468	0.740731	0.775593	0.865324	0.80833	0.883629	0.908337	0.888782	0.896883	0.710667	0.799325	0.82097	0.78252	0.815762	0.847175	0.828667	0.784903
	Sample 141	1.32923	0.898479	0.844997	0.837556	0.701361	0.72799	0.753316	0.765683	0.74564	0.719945	0.797015	0.875588	0.757986	0.878774	0.924118	0.896619	0.854163	0.698015	0.80869	0.827092	0.752578	0.842043	0.839856	0.866489	0.79429
	Sample 142	1.21837	0.881246	0.842427	0.851337	0.730908	0.744341	0.742332	0.708518	0.746473	0.697135	0.733597	0.867446	0.816993	0.873998	0.904961	0.895515	0.856592	0.634167	0.836524	0.814268	0.727423	0.809175	0.820102	0.818196	0.782494
	Sample 143	1.33431	0.857415	0.854786	0.862306	0.761586	0.686737	0.763365	0.759252	0.770744	0.678211	0.715089	0.87501	0.799123	0.874698	0.902153	0.885879	0.867821	0.645179	0.834332	0.8053	0.741798	0.763569	0.84784	0.845291	0.771874
	Sample 144	1.35827	0.868569	0.814561	0.802663	0.672671	0.684472	0.752266	0.743579	0.7697	0.679277	0.791309	0.847485	0.740111	0.853236	0.913877	0.904175	0.890982	0.676886	0.811993	0.833549	0.72054	0.78013	0.834627	0.838635	0.765561
	Sample 145	1.22923	0.880298	0.862362	0.862804	0.737469	0.763307	0.777585	0.806238	0.791259	0.770226	0.780055	0.844952	0.832535	0.888776	0.924241	0.898845	0.870536	0.701829	0.839892	0.835746	0.786825	0.824764	0.860906	0.854547	0.810922
	Sample 146	1.35838	0.889301	0.841903	0.866011	0.721215	0.719065	0.73608	0.773454	0.738695	0.719589	0.752318	0.875496	0.803305	0.877173	0.920226	0.87847	0.862855	0.688	0.813671	0.829244	0.745735	0.824685	0.817037	0.835433	0.803921
	Sample 147	1.25563	0.885253	0.855211	0.83877	0.707915	0.729129	0.781774	0.772	0.770943	0.734258	0.775992	0.87585	0.790257	0.8879	0.915095	0.893523	0.8817	0.646209	0.840701	0.837016	0.764005	0.799121	0.855209	0.825148	0.78255
	Sample 148	1.30667	0.882993	0.875256	0.850827	0.707882	0.711015	0.774969	0.783303	0.743793	0.715325	0.785326	0.903356	0.827304	0.903554	0.919864	0.900974	0.886954	0.720674	0.842343	0.863153	0.774541	0.795185	0.845012	0.846679	0.808247
	Sample 149	1.27467	0.887392	0.819151	0.827386	0.707726	0.751464	0.75633	0.735101	0.760695	0.701907	0.724793	0.863535	0.805875	0.873116	0.9151	0.893296	0.875361	0.608494	0.848474	0.770647	0.766849	0.762133	0.814917	0.811448	0.742464
	Sample 150	1.41753	0.874894	0.844735	0.854288	0.737182	0.706815	0.734345	0.781784	0.714817	0.732564	0.719614	0.874684	0.799101	0.892769	0.917159	0.895565	0.877458	0.664518	0.837204	0.839308	0.764255	0.794427	0.835498	0.851792	0.786513
	Sample 151	1.38529	0.884318	0.868482	0.847923	0.721209	0.73612	0.809114	0.788883	0.802921	0.748655	0.788999	0.880383	0.771929	0.899015	0.91368	0.901694	0.88884	0.709524	0.831924	0.841953	0.771045	0.813006	0.863629	0.854813	0.756893
	Sample 152	1.31762	0.883373	0.824693	0.846879	0.736696	0.765859	0.77762	0.758953	0.770554	0.75154	0.748406	0.8651	0.784678	0.908532	0.918661	0.895318	0.886992	0.742857	0.814139	0.857733	0.744302	0.819284	0.851945	0.872555	0.79286
	Sample 153	1.25517	0.874177	0.861614	0.880083	0.749493	0.758259	0.763274	0.778168	0.780524	0.709472	0.779995	0.88522	0.806938	0.869334	0.920253	0.893648	0.892224	0.681892	0.82723	0.85528	0.761626	0.817507	0.86401	0.849768	0.802816
	Sample 154	1.39437	0.890775	0.857122	0.872642	0.680187	0.762918	0.772979	0.766469	0.782474	0.725799	0.744998	0.865673	0.784784	0.898893	0.92404	0.915265	0.885536	0.675557	0.813744	0.825769	0.723354	0.808502	0.819048	0.833494	0.820293
	Sample 155	1.21575	0.896107	0.864966	0.877212	0.761143	0.722531	0.78026	0.751892	0.774	0.725841	0.77881	0.886244	0.839639	0.893471	0.92338	0.905192	0.8941	0.723822	0.826791	0.807862	0.772098	0.826608	0.847274	0.852362	0.81071
	Sample 156	1.34519	0.893027	0.862426	0.85366	0.726476	0.708108	0.779261	0.782752	0.777115	0.757897	0.796252	0.88347	0.774467	0.878882	0.910035	0.886468	0.866636	0.685637	0.84763	0.843746	0.776267	0.782909	0.829505	0.812174	0.802695
	Sample 157	1.33411	0.872606	0.866585	0.809792	0.733439	0.755353	0.784053	0.786638	0.790856	0.73862	0.785142	0.883628	0.814934	0.89304	0.9245	0.906383	0.891995	0.742937	0.839243	0.852831	0.773949	0.810992	0.879595	0.870172	0.741377
	Sample 158	1.28635	0.886956	0.854051	0.878978	0.742349	0.734811	0.782632	0.773316	0.782186	0.74769	0.807727	0.871444	0.804616	0.888212	0.91423	0.903466	0.877538	0.773438	0.826372	0.842713	0.744567	0.82248	0.855616	0.873047	0.808498
	Sample 159	1.25395	0.884465	0.871297	0.842193	0.74759	0.754877	0.773015	0.756825	0.791515	0.741986	0.769687	0.864412	0.806332	0.886234	0.919306	0.908523	0.891572	0.706114	0.827116	0.816543	0.722603	0.80399	0.851525	0.849934	0.804657
	Sample 160	1.31587	0.875244	0.853826	0.828533	0.708918	0.727109	0.786213	0.773402	0.760541	0.691855	0.797257	0.857732	0.799231	0.887874	0.916813	0.882519	0.873336	0.701777	0.826385	0.800714	0.767791	0.814668	0.856729	0.831897	0.765468
	Sample 161	1.33862	0.901476	0.865885	0.838696	0.748878	0.731328	0.797303	0.791639	0.771243	0.736599	0.773421	0.886811	0.811647	0.897505	0.925831	0.901222	0.888905	0.767476	0.835782	0.872029	0.777054	0.831871	0.860683	0.866767	0.819119
	Sample 162	1.29545	0.885877	0.8407	0.841023	0.69575	0.756881	0.770834	0.738753	0.765389	0.729129	0.775809	0.876424	0.815499	0.876334	0.921385	0.893772	0.874003	0.623852	0.83757	0.766408	0.791557	0.807172	0.844111	0.851443	0.783781
	Sample 163	1.25454	0.884228	0.855032	0.865183	0.737548	0.756382	0.784789	0.795792	0.787486	0.701312	0.761935	0.865947	0.794449	0.890508	0.916236	0.892835	0.859082	0.693048	0.836488	0.832534	0.787213	0.807323	0.832439	0.856716	0.79127
	Sample 164	1.2548	0.863	0.873825	0.843916	0.719705	0.703508	0.73562	0.770834	0.766514	0.691902	0.757951	0.836458	0.80707	0.886543	0.917898	0.884393	0.868167	0.729256	0.832456	0.803621	0.769601	0.833333	0.851445	0.858737	0.773396
	Sample 165	1.32113	0.872256	0.835868	0.832522	0.68684	0.72015	0.765549	0.785731	0.763334	0.725805	0.766333	0.863113	0.775197	0.87831	0.912484	0.899881	0.879277	0.700073	0.820793	0.825487	0.755596	0.794302	0.829547	0.833305	0.786407
	Sample 166	1.31123	0.894934	0.868098	0.859405	0.719843	0.73823	0.767476	0.756661	0.766045	0.728719	0.777109	0.868233	0.817366	0.915985	0.914819	0.911659	0.882819	0.773407	0.824914	0.8136	0.772091	0.833169	0.837148	0.84265	0.786823
	Sample 167	1.28068	0.876671	0.860714	0.859717	0.705045	0.733536	0.776368	0.78494	0.744894	0.733785	0.793596	0.867327	0.830037	0.891556	0.911734	0.873834	0.865568	0.739252	0.830743	0.837652	0.776015	0.808404	0.838464	0.855411	0.774627
	Sample 168	1.29283	0.888651	0.833834	0.873235	0.754228	0.715186	0.739686	0.717639	0.751733	0.716263	0.793677	0.889514	0.80628	0.893289	0.913341	0.908986	0.892521	0.757386	0.819715	0.839004	0.768027	0.805425	0.849725	0.875472	0.810694
	Sample 169	1.23091	0.873188	0.81119	0.840837	0.715803	0.674161	0.731872	0.69593	0.721784	0.672485	0.764229	0.876961	0.795961	0.865749	0.908236	0.872858	0.859816	0.701388	0.812533	0.784996	0.728306	0.792695	0.818572	0.843468	0.794487
	Sample 170	1.32531	0.872949	0.813655	0.857521	0.658496	0.737742	0.77325	0.736068	0.751216	0.694396	0.740006	0.875291	0.768441	0.872288	0.896772	0.877447	0.860234	0.684325	0.807844	0.831672	0.76549	0.789175	0.807005	0.833292	0.811954
	Sample 171	1.38615	0.891757	0.868685	0.86508	0.747945	0.742634	0.759727	0.774099	0.785561	0.747686	0.78816	0.89008	0.825833	0.891147	0.922166	0.903631	0.880544	0.757972	0.870614	0.842962	0.788363	0.800274	0.859931	0.864966	0.82618
	Sample 172	1.3038	0.902631	0.85144	0.857892	0.768651	0.717941	0.757597	0.805103	0.762964	0.728271	0.771089	0.875005	0.789413	0.883312	0.921169	0.901738	0.862618	0.74039	0.815608	0.838366	0.757523	0.830057	0.831619	0.841612	0.803151
	Sample 173	1.23697	0.8741	0.833947	0.835675	0.755523	0.722662	0.749197	0.73736	0.724096	0.741983	0.772275	0.867372	0.820837	0.886954	0.923304	0.901639	0.891285	0.721306	0.819585	0.801616	0.765827	0.800445	0.86017	0.853621	0.771634
	Sample 174	1.25193	0.892195	0.839992	0.865513	0.707401	0.744471	0.759557	0.737909	0.76243	0.67101	0.775655	0.856551	0.757129	0.877884	0.909832	0.887804	0.855817	0.669567	0.825688	0.783506	0.756289	0.829743	0.838179	0.840742	0.801284
	Sample 175	1.29307	0.875917	0.806301	0.837067	0.671962	0.74607	0.758135	0.733567	0.73474	0.717948	0.73183	0.841815	0.762819	0.874975	0.893608	0.890228	0.877221	0.571077	0.80412	0.803468	0.799376	0.758215	0.813657	0.834136	0.783091
	Sample 176	1.36301	0.876605	0.85696	0.830331	0.690634	0.756593	0.787151	0.762192	0.788879	0.750216	0.79048	0.850973	0.812323	0.895194	0.914983	0.903718	0.890787	0.727282	0.839505	0.849112	0.772624	0.794137	0.84351	0.863262	0.799268
	Sample 177	1.31293	0.890164	0.844863	0.87077	0.744937	0.721847	0.774966	0.797674	0.735	0.744528	0.737913	0.855791	0.795956	0.875223	0.921769	0.900317	0.896748	0.719571	0.823754	0.814115	0.763908	0.805746	0.826807	0.851631	0.781796
	Sample 178	1.35111	0.87843	0.851481	0.838603	0.693994	0.70857	0.771772	0.782726	0.768752	0.752804	0.757171	0.873676	0.808849	0.856162	0.919659	0.89628	0.864235	0.738406	0.846879	0.814798	0.782945	0.803935	0.834968	0.839481	0.77749
	Sample 179	1.29154	0.902511	0.871305	0.879509	0.703194	0.77198	0.783131	0.744193	0.803063	0.753793	0.78599	0.877449	0.797612	0.897051	0.925227	0.898296	0.856144	0.708444	0.815914	0.842358	0.734996	0.812111	0.81666	0.846703	0.819308
	Sample 180	1.35817	0.893737	0.870232	0.869822	0.746744	0.737992	0.765077	0.760824	0.76005	0.734212	0.679542	0.880368	0.79153	0.886854	0.905125	0.898189	0.896414	0.665833	0.815226	0.850327	0.748554	0.787412	0.815765	0.85125	0.80178
	Sample 181	1.38121	0.889166	0.851218	0.843121	0.697802	0.724049	0.780096	0.769662	0.780447	0.715528	0.756146	0.871454	0.760319	0.887558	0.913543	0.908041	0.879808	0.705079	0.831181	0.846398	0.737922	0.820571	0.839623	0.84463	0.759865
	Sample 182	1.39414	0.881264	0.848022	0.867397	0.744108	0.735768	0.775384	0.771207	0.777074	0.755353	0.746283	0.887506	0.798082	0.898476	0.90498	0.893272	0.881607	0.728505	0.821994	0.85558	0.751066	0.808239	0.815332	0.870518	0.81295
	Sample 183	1.33986	0.882247	0.834909	0.859854	0.754503	0.730072	0.780142	0.778396	0.762127	0.707968	0.783635	0.880893	0.815029	0.905628	0.912393	0.889505	0.878827	0.746115	0.849613	0.858175	0.75692	0.810591	0.857885	0.846244	0.817474
	Sample 184	1.3134	0.897267	0.861754	0.870578	0.735691	0.737241	0.76923	0.758884	0.770347	0.748467	0.761218	0.875149	0.81794	0.902917	0.916054	0.907673	0.893954	0.704492	0.838679	0.834063	0.758797	0.825668	0.855122	0.852637	0.787305
	Sample 185	1.23616	0.883357	0.850276	0.868243	0.712345	0.739384	0.753628	0.750192	0.777313	0.749324	0.778048	0.856515	0.791276	0.88248	0.913149	0.897225	0.878904	0.781367	0.80635	0.809809	0.733766	0.832593	0.825667	0.858392	0.815835
	Sample 186	1.26731	0.890296	0.831507	0.833803	0.695244	0.7467	0.805786	0.792183	0.769853	0.744463	0.811408	0.876371	0.782217	0.858725	0.920088	0.8893	0.875046	0.737134	0.803149	0.841174	0.76655	0.847608	0.85304	0.843677	0.811579
	Sample 187	1.34504	0.880005	0.847682	0.866891	0.74116	0.721251	0.759359	0.726497	0.800699	0.708947	0.732293	0.878112	0.817932	0.863102	0.908011	0.895038	0.849385	0.636694	0.827228	0.800311	0.754113	0.810683	0.842206	0.839715	0.778401
	Sample 188	1.31389	0.866601	0.837118	0.87302	0.710011	0.719706	0.753897	0.71336	0.770935	0.704275	0.759538	0.862028	0.771466	0.87754	0.897599	0.899073	0.878669	0.668689	0.841006	0.819889	0.751325	0.835628	0.846751	0.85511	0.830312
	Sample 189	1.27754	0.895736	0.869539	0.874391	0.751505	0.761436	0.77068	0.805955	0.782308	0.751262	0.740155	0.876427	0.809485	0.902041	0.925734	0.905481	0.899423	0.736011	0.831329	0.87593	0.775139	0.838717	0.845137	0.87762	0.81543
	Sample 190	1.3907	0.881698	0.876124	0.8668	0.711338	0.719051	0.777077	0.787481	0.818271	0.751998	0.789135	0.887652	0.793516	0.875034	0.925048	0.912157	0.865245	0.692978	0.820825	0.845154	0.756309	0.838974	0.863611	0.880949	0.791178
	Sample 191	1.30476	0.892764	0.843417	0.874205	0.69319	0.743478	0.772301	0.782691	0.756571	0.777496	0.794481	0.874095	0.799436	0.872929	0.924162	0.89821	0.872989	0.717178	0.810709	0.864505	0.765518	0.818038	0.84161	0.86727	0.812171
	Sample 192	1.27312	0.885234	0.849687	0.859392	0.739574	0.756887	0.767025	0.777118	0.763069	0.760737	0.684508	0.855726	0.824234	0.886273	0.92371	0.896706	0.86921	0.692827	0.825748	0.814181	0.789817	0.847967	0.828839	0.836503	0.822803
	Sample 193	1.23788	0.880439	0.854061	0.872875	0.72783	0.770671	0.776348	0.759382	0.748221	0.695603	0.757759	0.866056	0.825988	0.886403	0.932394	0.900176	0.869835	0.71827	0.826915	0.82661	0.789373	0.799228	0.855967	0.848582	0.805985
	Sample 194	1.19721	0.887251	0.86323	0.875442	0.720664	0.75011	0.755517	0.760448	0.783877	0.758353	0.740169	0.881867	0.81966	0.897209	0.912352	0.883001	0.876804	0.732893	0.822997	0.838641	0.717155	0.841904	0.824365	0.857002	0.817948
	Sample 195	1.24285	0.885312	0.871426	0.859939	0.70125	0.722486	0.794191	0.76698	0.79732	0.716352	0.794697	0.888366	0.782911	0.882128	0.921508	0.898594	0.898939	0.741985	0.834898	0.852772	0.777618	0.810406	0.855055	0.849385	0.786338
	Sample 196	1.32588	0.891586	0.855922	0.885398	0.762233	0.725963	0.77127	0.784394	0.788496	0.784169	0.776206	0.875482	0.817324	0.864304	0.90966	0.91	0.863408	0.73245	0.833417	0.851498	0.763143	0.802276	0.839669	0.849492	0.807394
	Sample 197	1.32431	0.887642	0.840854	0.818445	0.672171	0.757705	0.762101	0.727147	0.770453	0.719604	0.789907	0.847747	0.80252	0.886568	0.896271	0.882389	0.878055	0.676529	0.826409	0.828334	0.776292	0.817536	0.844354	0.851757	0.7534
	Sample 198	1.18978	0.901845	0.862091	0.840873	0.771867	0.766363	0.774697	0.804973	0.795618	0.747829	0.763043	0.882163	0.83648	0.893218	0.90775	0.884043	0.868777	0.740239	0.840165	0.85267	0.777087	0.824333	0.85957	0.859435	0.783881
	Sample 199	1.18192	0.865118	0.84294	0.85361	0.721424	0.727318	0.76624	0.715811	0.774736	0.677525	0.75245	0.854933	0.787269	0.866599	0.914903	0.890378	0.858133	0.71563	0.826038	0.801151	0.748715	0.782155	0.835559	0.857415	0.799834
	Sample 200	1.28687	0.868117	0.847755	0.822757	0.725619	0.752193	0.764585	0.777916	0.734276	0.731594	0.77495	0.875074	0.827319	0.875805	0.924079	0.895794	0.851897	0.696462	0.846519	0.798413	0.799798	0.804317	0.851476	0.866972	0.7626
	Sample 201	1.33134	0.880867	0.864661	0.877931	0.725898	0.74553	0.770315	0.772365	0.765094	0.738315	0.773172	0.873198	0.814864	0.889722	0.904875	0.894763	0.877988	0.679716	0.832044	0.832544	0.804069	0.802297	0.850695	0.857553	0.795238
	Sample 202	1.32003	0.8898	0.856887	0.874315	0.750537	0.72162	0.785448	0.787373	0.756054	0.729137	0.762224	0.876297	0.816444	0.900982	0.923394	0.909634	0.864525	0.729097	0.831969	0.841917	0.787579	0.841353	0.850415	0.866382	0.835696
	Sample 203	1.32358	0.880558	0.86638	0.837408	0.723351	0.728723	0.766486	0.776215	0.749677	0.705814	0.749874	0.878933	0.829304	0.899885	0.925335	0.900608	0.883869	0.746742	0.846028	0.849138	0.759094	0.793824	0.867571	0.845737	0.792939
	Sample 204	1.50923	0.873782	0.806095	0.856384	0.744231	0.696931	0.80737	0.780056	0.706775	0.699777	0.755468	0.883023	0.768061	0.903297	0.928286	0.903043	0.893983	0.752173	0.83602	0.834423	0.813152	0.796084	0.830093	0.867789	0.810808
	Sample 205	1.25669	0.880161	0.874812	0.86418	0.757398	0.763443	0.758915	0.748575	0.790917	0.704746	0.790193	0.87876	0.828599	0.882992	0.923213	0.896008	0.880312	0.711709	0.854708	0.807411	0.77293	0.78632	0.831469	0.861055	0.793197
	Sample 206	1.39292	0.891053	0.860352	0.853462	0.740483	0.753068	0.740215	0.757552	0.737623	0.695855	0.77585	0.860808	0.814345	0.901546	0.92949	0.906988	0.883779	0.701826	0.826691	0.851649	0.789059	0.814216	0.85466	0.874517	0.806097
	Sample 207	1.30547	0.888966	0.858755	0.84842	0.720641	0.766159	0.801803	0.790379	0.813581	0.75055	0.782018	0.878478	0.808462	0.892913	0.921609	0.89428	0.870298	0.713839	0.845188	0.844971	0.780354	0.816005	0.851128	0.863159	0.818636
	Sample 208	1.34299	0.892585	0.874459	0.887085	0.752854	0.758798	0.803364	0.820632	0.788072	0.748286	0.764086	0.896612	0.825832	0.896359	0.929264	0.908877	0.896066	0.749613	0.838828	0.864261	0.819191	0.854684	0.859845	0.891031	0.851831
	Sample 209	1.22868	0.874504	0.845275	0.85704	0.703533	0.689514	0.746524	0.722798	0.696003	0.74052	0.744743	0.858312	0.750321	0.861546	0.917904	0.897357	0.871567	0.721394	0.815934	0.822927	0.701875	0.772371	0.82944	0.851416	0.805599
	Sample 210	1.34046	0.873713	0.863089	0.84771	0.721045	0.739177	0.769178	0.747849	0.780164	0.737878	0.782746	0.86507	0.814659	0.895983	0.907153	0.900834	0.890007	0.705057	0.832298	0.825547	0.760974	0.817691	0.848836	0.875183	0.774498
	Sample 211	1.34825	0.875038	0.834964	0.856396	0.693686	0.74391	0.773181	0.74445	0.79142	0.724703	0.769477	0.876822	0.805421	0.875056	0.89838	0.893854	0.867278	0.655264	0.844603	0.829795	0.748342	0.793152	0.819059	0.848709	0.791712
	Sample 212	1.42247	0.886712	0.85648	0.867856	0.734293	0.747344	0.771273	0.792397	0.758324	0.724653	0.75056	0.873163	0.820957	0.908615	0.91665	0.905913	0.900913	0.747659	0.816269	0.85082	0.802252	0.809944	0.859631	0.852015	0.816581
	Sample 213	1.26119	0.881749	0.819785	0.834195	0.656728	0.748329	0.76491	0.748838	0.730058	0.722015	0.762616	0.857108	0.815592	0.878879	0.910473	0.897612	0.87905	0.717368	0.823346	0.828885	0.782413	0.798104	0.818764	0.850223	0.800818
	Sample 214	1.3725	0.873303	0.857871	0.841768	0.686326	0.763764	0.76942	0.77838	0.766488	0.73672	0.793645	0.856043	0.764571	0.876839	0.902933	0.879998	0.886349	0.692373	0.834032	0.820346	0.764733	0.81858	0.824085	0.834212	0.769374
	Sample 215	1.32798	0.888528	0.853637	0.8699	0.749928	0.719551	0.75427	0.787256	0.746804	0.713096	0.723087	0.868102	0.844144	0.886871	0.908097	0.888787	0.869467	0.719319	0.81089	0.832173	0.754898	0.813188	0.853048	0.840054	0.801868
	Sample 216	1.30759	0.892144	0.867247	0.850543	0.731033	0.764952	0.753203	0.811081	0.794192	0.737354	0.714978	0.879628	0.807095	0.900117	0.919957	0.900083	0.85838	0.737371	0.836162	0.847446	0.755802	0.846901	0.86135	0.846626	0.801639
	Sample 217	1.3884	0.90774	0.868011	0.871886	0.761411	0.739683	0.803634	0.79598	0.782165	0.75846	0.767664	0.884991	0.836265	0.910334	0.934275	0.908581	0.875813	0.727922	0.842865	0.856343	0.77665	0.833191	0.859659	0.864675	0.804913
	Sample 218	1.42267	0.890365	0.851041	0.800662	0.686438	0.722536	0.770079	0.737978	0.778041	0.713671	0.759669	0.861946	0.797811	0.883721	0.913483	0.900287	0.871697	0.698604	0.815914	0.808697	0.750364	0.818052	0.825011	0.853121	0.770881
	Sample 219	1.29916	0.89013	0.86651	0.858527	0.741653	0.747473	0.751514	0.779685	0.750173	0.759573	0.76101	0.892187	0.820148	0.87717	0.917999	0.884813	0.873348	0.703438	0.816116	0.829372	0.745877	0.815429	0.853189	0.850639	0.78547
	Sample 220	1.25571	0.900674	0.858939	0.85866	0.69926	0.756931	0.785056	0.795756	0.766768	0.739601	0.713008	0.870163	0.827119	0.897957	0.91853	0.87438	0.861134	0.690854	0.825101	0.813262	0.78254	0.819567	0.831537	0.816267	0.794132
	Sample 221	1.32725	0.891276	0.837932	0.85271	0.706636	0.737674	0.779509	0.800867	0.759643	0.732028	0.747093	0.881145	0.833679	0.905272	0.918566	0.899528	0.842922	0.766033	0.832575	0.854594	0.803226	0.835634	0.860946	0.857467	0.826514
	Sample 222	1.27689	0.870666	0.838115	0.84252	0.705302	0.75336	0.74761	0.756942	0.777677	0.7161	0.716752	0.826895	0.802567	0.894651	0.887943	0.878035	0.866095	0.680519	0.782409	0.767299	0.779435	0.788176	0.814454	0.798882	0.772429
	Sample 223	1.2732	0.862499	0.823502	0.830472	0.69794	0.736551	0.750229	0.784836	0.745438	0.683213	0.749329	0.844615	0.765537	0.877701	0.905107	0.86276	0.836658	0.649451	0.814605	0.783894	0.772788	0.78769	0.849597	0.808504	0.770174
	Sample 224	1.34008	0.891332	0.832927	0.848934	0.682841	0.698067	0.761797	0.743835	0.755651	0.696875	0.727518	0.868657	0.779472	0.880362	0.900272	0.888986	0.877531	0.658949	0.859864	0.803247	0.774973	0.815932	0.840617	0.804302	0.80428
	Sample 225	1.20055	0.895522	0.861805	0.854173	0.705503	0.769977	0.779811	0.720353	0.786769	0.695542	0.763978	0.880393	0.829526	0.891842	0.913156	0.898487	0.878397	0.641029	0.8252	0.847305	0.786376	0.815934	0.837473	0.858232	0.787202
	Sample 226	1.2306	0.896557	0.848509	0.850853	0.715368	0.709864	0.764585	0.751451	0.773043	0.737867	0.794022	0.880215	0.788501	0.874403	0.919601	0.900478	0.873495	0.664991	0.849089	0.833975	0.78961	0.81764	0.849823	0.84313	0.820098
	Sample 227	1.30176	0.86176	0.834826	0.860976	0.738588	0.734855	0.760042	0.747542	0.762473	0.690339	0.727379	0.86119	0.764051	0.873211	0.910311	0.898915	0.888962	0.732554	0.828419	0.831379	0.744121	0.765799	0.827192	0.834894	0.80749
	Sample 228	1.25824	0.888472	0.857189	0.884399	0.740381	0.749661	0.763645	0.774704	0.746163	0.733216	0.757899	0.871072	0.821311	0.901043	0.926468	0.906462	0.88419	0.674161	0.812062	0.82859	0.753347	0.808369	0.842203	0.836095	0.830406
	Sample 229	1.30609	0.889636	0.871817	0.858779	0.766241	0.727316	0.789787	0.808174	0.825361	0.705157	0.78847	0.886761	0.842284	0.906603	0.916663	0.897199	0.893632	0.767659	0.843371	0.834529	0.797423	0.828647	0.859403	0.857596	0.796024
	Sample 230	1.37615	0.894189	0.851559	0.858605	0.728006	0.741787	0.785311	0.830502	0.812924	0.761948	0.809483	0.876585	0.825692	0.905838	0.913821	0.892723	0.870756	0.756869	0.851716	0.833123	0.809151	0.790671	0.846212	0.832134	0.764456
	Sample 231	1.39088	0.897184	0.894301	0.864522	0.762243	0.775947	0.780271	0.825497	0.826343	0.793607	0.768987	0.876844	0.830537	0.905839	0.925677	0.902587	0.910197	0.716326	0.828819	0.843725	0.782024	0.817626	0.841543	0.835011	0.795544
	Sample 232	1.16196	0.895459	0.865061	0.861819	0.726259	0.752296	0.797548	0.746091	0.785383	0.758512	0.762768	0.887897	0.808344	0.895193	0.918882	0.895533	0.900694	0.70778	0.841533	0.820186	0.763478	0.827432	0.851237	0.8516	0.818537
	Sample 233	1.38263	0.888288	0.848975	0.83159	0.745269	0.734099	0.753235	0.766323	0.78468	0.706354	0.751901	0.875355	0.81361	0.902727	0.906333	0.89535	0.871862	0.741254	0.818776	0.84002	0.752148	0.815207	0.850548	0.856983	0.77641
	Sample 234	1.36995	0.882461	0.849386	0.834915	0.683554	0.724732	0.752004	0.709401	0.729473	0.709908	0.741259	0.864132	0.790654	0.894536	0.921741	0.899868	0.886638	0.717372	0.81979	0.834542	0.739058	0.820147	0.828147	0.87547	0.762098
	Sample 235	1.20146	0.888901	0.863012	0.84934	0.731579	0.688113	0.792521	0.763194	0.754964	0.710336	0.744853	0.888068	0.795146	0.879507	0.917572	0.902539	0.875692	0.677344	0.820425	0.859821	0.79013	0.83323	0.850278	0.87481	0.789739
	Sample 236	1.3175	0.863841	0.835581	0.851784	0.747772	0.666655	0.744722	0.766538	0.757042	0.707095	0.717296	0.862113	0.790241	0.874909	0.912798	0.906475	0.870692	0.703893	0.823578	0.804448	0.737672	0.854934	0.832604	0.847281	0.781996
	Sample 237	1.29489	0.879166	0.835697	0.871837	0.749809	0.755859	0.778752	0.757151	0.763151	0.697577	0.752973	0.870319	0.792406	0.894589	0.91178	0.888743	0.88124	0.752701	0.811403	0.842509	0.764992	0.803513	0.842342	0.863302	0.815019
	Sample 238	1.24408	0.848016	0.841634	0.847029	0.725705	0.706577	0.730317	0.776627	0.782009	0.729789	0.731718	0.847276	0.823142	0.87523	0.898359	0.873207	0.881311	0.709603	0.833207	0.788106	0.763276	0.818166	0.845623	0.823954	0.767165
	Sample 239	1.34496	0.883392	0.86302	0.878068	0.745586	0.723917	0.778652	0.797584	0.790785	0.72158	0.754926	0.882431	0.788952	0.888781	0.919346	0.893015	0.869236	0.743307	0.830106	0.833256	0.719231	0.840396	0.847031	0.832739	0.810584
	Sample 240	1.23328	0.88897	0.846429	0.878197	0.750088	0.715166	0.764818	0.745491	0.763998	0.718115	0.748297	0.86376	0.803044	0.895633	0.90962	0.889921	0.873655	0.715476	0.84445	0.805992	0.763657	0.818823	0.833883	0.850727	0.810589
	Sample 241	1.32217	0.88114	0.872159	0.861708	0.743598	0.745489	0.797499	0.737264	0.736677	0.683494	0.763152	0.883537	0.809501	0.889708	0.931567	0.912036	0.878343	0.737081	0.839526	0.854862	0.787794	0.811647	0.860192	0.874227	0.795496
	Sample 242	1.24012	0.89976	0.838852	0.868843	0.728797	0.757887	0.780106	0.795778	0.801278	0.764743	0.758277	0.878571	0.855274	0.890175	0.913401	0.899132	0.879069	0.745024	0.826615	0.843768	0.774515	0.816167	0.849529	0.839778	0.800787
	Sample 243	1.24026	0.890923	0.826833	0.85131	0.704748	0.731431	0.773101	0.77051	0.765103	0.725803	0.777354	0.867599	0.774007	0.873961	0.905553	0.877852	0.846176	0.681247	0.836417	0.817549	0.755602	0.807079	0.825444	0.831275	0.793527
	Sample 244	1.3687	0.87956	0.842807	0.868299	0.773063	0.704638	0.742409	0.768017	0.712217	0.7303	0.76991	0.87707	0.786528	0.871523	0.916178	0.908689	0.893445	0.772777	0.826951	0.824753	0.71606	0.834915	0.855221	0.853755	0.812716
	Sample 245	1.2324	0.870622	0.866288	0.850469	0.722654	0.732258	0.777082	0.719603	0.787999	0.70703	0.735595	0.874249	0.809456	0.873711	0.923616	0.907788	0.885411	0.680995	0.835105	0.80371	0.754883	0.809284	0.833312	0.844301	0.762779
	Sample 246	1.31756	0.895425	0.831454	0.85463	0.66458	0.726563	0.779851	0.726706	0.746421	0.74179	0.764812	0.884357	0.785576	0.891069	0.906968	0.892377	0.874176	0.695668	0.806414	0.850301	0.743135	0.809567	0.841931	0.834723	0.788683
	Sample 247	1.29318	0.861362	0.846617	0.849906	0.702265	0.774991	0.787663	0.778149	0.780912	0.74914	0.807137	0.87508	0.82179	0.861725	0.922504	0.889016	0.845031	0.74505	0.842908	0.83131	0.795835	0.801963	0.852478	0.855897	0.791709
	Sample 248	1.2491	0.897247	0.887497	0.884792	0.744883	0.76415	0.789567	0.814988	0.782314	0.735334	0.774998	0.881631	0.830042	0.895112	0.930485	0.898428	0.883951	0.727612	0.840707	0.816686	0.795838	0.809798	0.854556	0.860745	0.836219
	Sample 249	1.40444	0.883316	0.850728	0.849397	0.73896	0.749323	0.765	0.811908	0.817649	0.735963	0.736293	0.864609	0.809999	0.877549	0.907685	0.897546	0.861014	0.705809	0.830942	0.846915	0.748655	0.82133	0.845998	0.831167	0.777281
	Sample 250	1.25724	0.895506	0.872142	0.869289	0.730242	0.758741	0.788659	0.784611	0.760067	0.749908	0.795698	0.898017	0.817225	0.901793	0.937388	0.901078	0.881629	0.761076	0.852286	0.848053	0.809101	0.814162	0.851506	0.854786	0.79904
	Sample 251	1.32401	0.889588	0.866356	0.864037	0.715275	0.727484	0.755029	0.752462	0.777798	0.701128	0.787095	0.859538	0.827807	0.884714	0.922177	0.902842	0.882411	0.702723	0.815865	0.849474	0.773495	0.825806	0.863724	0.839775	0.77704
	Sample 252	1.23979	0.87377	0.82938	0.847766	0.658643	0.739679	0.769428	0.770161	0.767158	0.736401	0.724177	0.876419	0.797636	0.868325	0.899473	0.88224	0.811102	0.670097	0.812973	0.793217	0.732784	0.824464	0.836176	0.834382	0.799847
	Sample 253	1.26536	0.898262	0.84655	0.873084	0.737743	0.714387	0.781807	0.747869	0.744497	0.722536	0.768845	0.872828	0.803079	0.878047	0.912002	0.89232	0.892886	0.729786	0.823829	0.832147	0.763642	0.831888	0.838837	0.857753	0.806942
	Sample 254	1.31301	0.884949	0.852435	0.855426	0.723732	0.735102	0.768087	0.78104	0.713237	0.733701	0.748175	0.875277	0.809942	0.892258	0.92267	0.894806	0.891354	0.718126	0.861259	0.829523	0.777247	0.822601	0.858376	0.82825	0.791243
	Sample 255	1.331	0.895283	0.875752	0.863176	0.801787	0.745004	0.811955	0.813377	0.774518	0.785098	0.783264	0.880362	0.794389	0.890916	0.936912	0.914219	0.88929	0.777475	0.829758	0.852754	0.769001	0.845071	0.860065	0.875621	0.821729
	Sample 256	1.27825	0.901898	0.862521	0.871748	0.697371	0.731879	0.790921	0.787786	0.815396	0.694616	0.747123	0.89332	0.832036	0.889434	0.920243	0.901376	0.855898	0.72958	0.832854	0.820248	0.737959	0.833768	0.862575	0.840917	0.811587
	Sample 257	1.30731	0.880984	0.843159	0.83113	0.696494	0.730997	0.76675	0.76168	0.765646	0.720488	0.768212	0.867199	0.788849	0.871885	0.908507	0.891265	0.869048	0.675693	0.830412	0.835504	0.760296	0.822793	0.822831	0.846986	0.778176
	Sample 258	1.0971	0.910778	0.884759	0.867084	0.696274	0.770715	0.773312	0.766308	0.822315	0.744293	0.769966	0.848511	0.82221	0.879462	0.923769	0.901048	0.862776	0.678636	0.833109	0.793408	0.760857	0.813739	0.834822	0.817636	0.783774
	Sample 259	1.23459	0.893555	0.852529	0.862951	0.752832	0.741733	0.748485	0.742566	0.766238	0.697179	0.763324	0.836728	0.793552	0.894308	0.915171	0.921396	0.891166	0.719751	0.829231	0.814303	0.743454	0.827439	0.830585	0.858486	0.786181
	Sample 260	1.28666	0.906394	0.855919	0.849506	0.734655	0.784702	0.772308	0.792442	0.787337	0.781013	0.779684	0.87338	0.802562	0.902596	0.920101	0.890066	0.902772	0.735489	0.838476	0.856735	0.761963	0.842957	0.863074	0.852533	0.808204
	Sample 261	1.38236	0.885781	0.864912	0.867074	0.711554	0.702928	0.741248	0.782456	0.737298	0.732675	0.700647	0.87978	0.826916	0.897525	0.921606	0.894154	0.881087	0.722028	0.824573	0.839108	0.76632	0.815679	0.869009	0.820341	0.825397
	Sample 262	1.36721	0.876847	0.864829	0.856304	0.773876	0.765778	0.770531	0.799469	0.791839	0.741918	0.768659	0.887129	0.825364	0.897652	0.916867	0.896253	0.869046	0.776317	0.840559	0.847915	0.783383	0.805794	0.846933	0.859761	0.765224
	Sample 263	1.46163	0.883597	0.862933	0.848395	0.687039	0.74212	0.779081	0.786519	0.78856	0.761104	0.766886	0.882113	0.811071	0.888868	0.913614	0.895527	0.896622	0.711129	0.812589	0.846473	0.752905	0.801799	0.824466	0.839588	0.76728
	Sample 264	1.3112	0.898321	0.869085	0.867624	0.763926	0.735073	0.768185	0.776332	0.715518	0.757863	0.756444	0.873192	0.820405	0.907989	0.933464	0.892909	0.905954	0.755382	0.84913	0.879948	0.797	0.822726	0.847156	0.834902	0.78832
	Sample 265	1.24654	0.883609	0.818585	0.824607	0.667262	0.722678	0.774987	0.721137	0.721427	0.719539	0.782889	0.851291	0.778647	0.887415	0.921196	0.895333	0.904086	0.653792	0.83577	0.849883	0.75538	0.795938	0.843155	0.848972	0.80633
	Sample 266	1.30102	0.884588	0.827457	0.839818	0.72594	0.740295	0.79273	0.76872	0.748995	0.745733	0.78066	0.867105	0.779003	0.886078	0.922701	0.900293	0.900782	0.729121	0.825717	0.85082	0.75878	0.788577	0.835806	0.836941	0.785055
	Sample 267	1.34617	0.882716	0.83167	0.829402	0.705863	0.726116	0.754311	0.77585	0.749399	0.75982	0.773888	0.887444	0.795063	0.899852	0.928626	0.90119	0.894484	0.7448	0.819155	0.858446	0.750337	0.809019	0.825252	0.831544	0.773379
	Sample 268	1.21911	0.899687	0.877174	0.863629	0.746532	0.732897	0.748305	0.787397	0.766201	0.755604	0.777258	0.854641	0.805106	0.869076	0.920784	0.889554	0.864316	0.722773	0.820056	0.829501	0.775656	0.825572	0.839158	0.842829	0.805
	Sample 269	1.52227	0.875055	0.859425	0.851086	0.707713	0.722824	0.767459	0.768195	0.741056	0.707011	0.739023	0.864036	0.77004	0.870958	0.925189	0.915616	0.879721	0.693711	0.818293	0.835258	0.75881	0.759716	0.810024	0.839703	0.791004
	Sample 270	1.39877	0.891899	0.864865	0.876563	0.723027	0.777971	0.77595	0.801024	0.802388	0.737733	0.81354	0.892081	0.851174	0.883274	0.915385	0.905755	0.890681	0.752106	0.822383	0.867614	0.806447	0.810625	0.860753	0.847306	0.813773
	Sample 271	1.27322	0.8697	0.852237	0.876487	0.717373	0.757851	0.752155	0.74562	0.782463	0.734291	0.746467	0.857225	0.785666	0.878916	0.903588	0.873262	0.874612	0.739268	0.81074	0.806184	0.732281	0.77737	0.829603	0.833878	0.811799
	Sample 272	1.17847	0.876375	0.866064	0.849066	0.717923	0.72065	0.781074	0.73093	0.748309	0.759626	0.784044	0.859538	0.779522	0.885093	0.908346	0.896789	0.881454	0.693712	0.832807	0.770376	0.742761	0.804416	0.802189	0.843051	0.775295
	Sample 273	1.30685	0.892217	0.857437	0.840594	0.716552	0.713676	0.785675	0.809248	0.784548	0.743757	0.737666	0.883956	0.802162	0.902941	0.9174	0.902152	0.861346	0.708046	0.845478	0.852217	0.760775	0.834013	0.846565	0.821269	0.796948
	Sample 274	1.37071	0.907338	0.875101	0.872763	0.729136	0.758576	0.791811	0.767703	0.795385	0.764146	0.763168	0.890063	0.816727	0.89347	0.924639	0.917902	0.887535	0.723568	0.846863	0.84617	0.762164	0.817413	0.837146	0.869087	0.816567
	Sample 275	1.2315	0.902031	0.86153	0.832614	0.690237	0.762129	0.768651	0.771542	0.788655	0.720881	0.757915	0.882751	0.835522	0.905557	0.912538	0.891349	0.874316	0.703774	0.818591	0.78964	0.776054	0.824723	0.837195	0.839036	0.767283
	Sample 276	1.37711	0.894951	0.846815	0.845439	0.726622	0.7663	0.776092	0.789238	0.806435	0.747613	0.793718	0.873757	0.792353	0.889574	0.920535	0.904967	0.885006	0.740266	0.826342	0.839638	0.7311	0.813503	0.831645	0.836175	0.756273
	Sample 277	1.26069	0.893895	0.844089	0.825931	0.725636	0.712927	0.764197	0.798574	0.746959	0.702484	0.728515	0.8814	0.785988	0.874807	0.926688	0.901927	0.879572	0.663661	0.828207	0.795964	0.762877	0.810462	0.822403	0.83648	0.789134
	Sample 278	1.28535	0.890876	0.847536	0.851601	0.75568	0.754148	0.794169	0.761848	0.770437	0.713652	0.697063	0.85198	0.810503	0.885649	0.908137	0.887575	0.886167	0.693311	0.820012	0.799973	0.78608	0.807781	0.833103	0.861146	0.809972
	Sample 279	1.3207	0.877526	0.848037	0.807078	0.707604	0.709886	0.798132	0.762414	0.772927	0.697545	0.785947	0.873023	0.750568	0.885346	0.926925	0.891657	0.857977	0.715408	0.830554	0.811034	0.734071	0.803237	0.833181	0.803809	0.774706
	Sample 280	1.26781	0.877321	0.867068	0.848133	0.733837	0.740475	0.785657	0.763998	0.796773	0.726237	0.740385	0.870339	0.791548	0.890286	0.911426	0.90779	0.883557	0.717372	0.846402	0.826905	0.783203	0.815443	0.826928	0.863287	0.776932
	Sample 281	1.24766	0.906101	0.880524	0.861364	0.747816	0.733647	0.781339	0.758946	0.7646	0.735522	0.724301	0.882389	0.821885	0.884536	0.92009	0.896309	0.888972	0.724923	0.813097	0.8044	0.756551	0.834586	0.843539	0.852291	0.796817
	Sample 282	1.27749	0.893746	0.820029	0.858042	0.714711	0.745818	0.779545	0.74787	0.729227	0.727811	0.765368	0.863346	0.799029	0.895802	0.915734	0.895874	0.861976	0.698782	0.804215	0.842994	0.785809	0.812889	0.842961	0.856327	0.790753
	Sample 283	1.31841	0.8675	0.851646	0.860684	0.707578	0.758352	0.792366	0.792004	0.779821	0.742865	0.799905	0.875542	0.828865	0.896096	0.909888	0.901718	0.880624	0.719406	0.836715	0.837368	0.761557	0.818831	0.857315	0.828682	0.755184
	Sample 284	1.3091	0.864618	0.814986	0.844125	0.722083	0.707607	0.773656	0.753951	0.730114	0.746237	0.77259	0.877503	0.793693	0.880607	0.908304	0.898508	0.858883	0.710532	0.824014	0.822006	0.769578	0.803179	0.844004	0.870066	0.816318
	Sample 285	1.38121	0.899645	0.880567	0.883533	0.727621	0.763197	0.792866	0.747446	0.778575	0.758706	0.741971	0.874439	0.798025	0.908437	0.932958	0.920478	0.911617	0.717705	0.847395	0.84133	0.806656	0.819477	0.845758	0.866285	0.805212
	Sample 286	1.40407	0.884549	0.840473	0.87015	0.7379	0.753778	0.772294	0.829499	0.797186	0.77347	0.766887	0.853507	0.799084	0.886027	0.910678	0.887996	0.85617	0.732657	0.852897	0.83188	0.747145	0.823604	0.851163	0.848448	0.838237
	Sample 287	1.25776	0.886378	0.850004	0.8575	0.721223	0.755075	0.760274	0.7764	0.744373	0.77231	0.759184	0.869093	0.811214	0.888199	0.917553	0.880052	0.883357	0.704404	0.841425	0.79423	0.812423	0.818822	0.833799	0.837457	0.795159
	Sample 288	1.26148	0.868941	0.84557	0.854683	0.73246	0.715208	0.774244	0.764833	0.79247	0.738853	0.780179	0.860609	0.771652	0.872417	0.910399	0.894077	0.879831	0.740738	0.82278	0.828806	0.772482	0.808472	0.847445	0.861078	0.804972
	Sample 289	1.23795	0.892702	0.886849	0.887508	0.786556	0.74882	0.796176	0.798434	0.814278	0.767823	0.768069	0.875477	0.813017	0.902593	0.935452	0.904105	0.87547	0.754727	0.84065	0.851953	0.772603	0.840955	0.87368	0.876308	0.822342
	Sample 290	1.34588	0.884333	0.850895	0.852956	0.748476	0.763036	0.772786	0.785458	0.799132	0.768375	0.76755	0.873098	0.804837	0.887791	0.909677	0.890809	0.873048	0.712695	0.840505	0.829686	0.759416	0.813552	0.837476	0.853806	0.815026
	Sample 291	1.25911	0.886986	0.860851	0.864212	0.700095	0.761344	0.800474	0.8018	0.77454	0.734438	0.769684	0.895035	0.807169	0.876557	0.923784	0.886715	0.879719	0.699863	0.837344	0.835036	0.755195	0.814532	0.843068	0.828213	0.794487
	Sample 292	1.31639	0.884553	0.844605	0.866335	0.756546	0.757472	0.820472	0.802648	0.805741	0.720837	0.766182	0.883014	0.808458	0.893036	0.919168	0.895366	0.854869	0.800344	0.839393	0.85388	0.731965	0.838846	0.873517	0.843798	0.820101
	Sample 293	1.3853	0.891541	0.847738	0.882677	0.766905	0.785145	0.766638	0.778913	0.800151	0.766668	0.775747	0.875515	0.79888	0.893995	0.919741	0.893084	0.881324	0.743211	0.845335	0.857429	0.742104	0.798349	0.855595	0.875502	0.808147
	Sample 294	1.27587	0.89528	0.858685	0.850553	0.753585	0.735047	0.793807	0.785692	0.769404	0.725167	0.720407	0.871844	0.822479	0.905421	0.921537	0.88762	0.874342	0.727401	0.816613	0.837034	0.760262	0.821942	0.842828	0.837339	0.802578
	Sample 295	1.35112	0.8812	0.863242	0.883548	0.750064	0.717903	0.727492	0.75022	0.777779	0.74921	0.754986	0.878082	0.83261	0.904743	0.902644	0.90322	0.884526	0.704248	0.828495	0.817401	0.764657	0.824623	0.841915	0.873501	0.781329
	Sample 296	1.27301	0.885876	0.872178	0.858293	0.741551	0.738147	0.787724	0.759059	0.772682	0.757859	0.783414	0.867802	0.804385	0.877162	0.928274	0.881081	0.838251	0.71034	0.8021	0.819777	0.750132	0.838063	0.84391	0.857067	0.766025
	Sample 297	1.32893	0.896067	0.86251	0.862664	0.752877	0.742043	0.783243	0.777817	0.796488	0.735602	0.795994	0.875752	0.819204	0.89245	0.906525	0.900898	0.890012	0.733087	0.83424	0.839393	0.772844	0.817687	0.854124	0.86913	0.799733
	Sample 298	1.31341	0.887776	0.87161	0.885276	0.756197	0.711477	0.753415	0.775987	0.766227	0.739092	0.740337	0.885247	0.82628	0.884766	0.92141	0.910389	0.903932	0.72143	0.842467	0.843659	0.791494	0.84368	0.862918	0.863602	0.840386
	Sample 299	1.35918	0.889466	0.8633	0.867294	0.743821	0.722966	0.760907	0.776393	0.766843	0.742424	0.751838	0.86851	0.803802	0.873209	0.927416	0.90928	0.874462	0.73449	0.847122	0.863734	0.774318	0.8082	0.852181	0.875857	0.8292
	Sample 300	1.31298	0.88008	0.853439	0.839928	0.736382	0.726629	0.761205	0.778768	0.804464	0.705813	0.788076	0.880549	0.816856	0.856976	0.912267	0.89228	0.864273	0.726615	0.838233	0.823857	0.756226	0.802083	0.829994	0.849584	0.753388
	Sample 301	1.33753	0.863516	0.860027	0.84763	0.768226	0.688037	0.760047	0.725431	0.771464	0.706193	0.7489	0.872825	0.735053	0.876831	0.912603	0.896838	0.871602	0.722212	0.816358	0.798123	0.726563	0.797691	0.819559	0.844559	0.813346
	Sample 302	1.34047	0.880488	0.85828	0.874675	0.763003	0.711335	0.770766	0.748136	0.747633	0.74152	0.748642	0.85204	0.791004	0.876723	0.911414	0.900595	0.900819	0.718456	0.811299	0.797685	0.751789	0.798977	0.847476	0.860077	0.809485
	Sample 303	1.47911	0.855085	0.835836	0.831288	0.733902	0.722262	0.725661	0.771176	0.728895	0.72559	0.702902	0.848571	0.807626	0.875865	0.915435	0.883312	0.849333	0.724409	0.788155	0.773773	0.76035	0.78685	0.818596	0.824764	0.770485
	Sample 304	1.27836	0.866748	0.861926	0.860997	0.67487	0.69791	0.754581	0.754365	0.723577	0.706032	0.752202	0.852415	0.788988	0.886507	0.915229	0.855893	0.842951	0.642919	0.829229	0.812396	0.74771	0.781005	0.827583	0.807484	0.779649
	Sample 305	1.30735	0.852999	0.832262	0.845579	0.741019	0.734438	0.761089	0.792006	0.754932	0.749209	0.751708	0.872538	0.791983	0.875679	0.911251	0.872757	0.854577	0.697851	0.796582	0.815747	0.762308	0.769568	0.823014	0.824299	0.795181
	Sample 306	1.33776	0.868311	0.85872	0.872029	0.74961	0.713364	0.766466	0.773462	0.786877	0.721943	0.726632	0.877635	0.819549	0.884561	0.908011	0.907965	0.886226	0.748646	0.831446	0.818406	0.741834	0.822331	0.8221	0.856486	0.789328
	Sample 307	1.2527	0.898783	0.857712	0.87879	0.745252	0.737775	0.804374	0.776061	0.752275	0.740492	0.796433	0.874448	0.785976	0.903234	0.910931	0.910901	0.899415	0.730518	0.84356	0.837494	0.807042	0.830114	0.851349	0.869262	0.797091
	Sample 308	1.23455	0.875216	0.853222	0.873935	0.737782	0.717772	0.769468	0.741907	0.743014	0.743915	0.765923	0.875036	0.77852	0.872499	0.914258	0.886973	0.849463	0.716914	0.826306	0.824089	0.74327	0.812245	0.838204	0.8593	0.804497
	Sample 309	1.32677	0.877381	0.849898	0.854795	0.742738	0.713346	0.789763	0.75233	0.732665	0.68091	0.747121	0.885352	0.776659	0.888958	0.928322	0.890054	0.862791	0.648651	0.818617	0.831918	0.79367	0.790858	0.840107	0.872808	0.802277
	Sample 310	1.25028	0.887401	0.83589	0.846799	0.775308	0.718887	0.7745	0.77759	0.77419	0.705498	0.776959	0.864017	0.817852	0.857815	0.922754	0.903348	0.88925	0.714053	0.846485	0.840964	0.733491	0.820088	0.849106	0.855093	0.822384
	Sample 311	1.29305	0.893196	0.861462	0.869142	0.757078	0.768051	0.783719	0.789001	0.798422	0.706984	0.762958	0.867301	0.812679	0.869765	0.919709	0.893907	0.869943	0.727879	0.806749	0.830729	0.768967	0.812644	0.810592	0.82467	0.802826
	Sample 312	1.26704	0.897363	0.852805	0.841323	0.723418	0.725363	0.775071	0.762757	0.781815	0.718744	0.782891	0.867948	0.78868	0.894733	0.929595	0.916312	0.886989	0.702621	0.848589	0.849977	0.737213	0.810781	0.871422	0.850101	0.823059
	Sample 313	1.27999	0.889443	0.837555	0.865143	0.748587	0.739001	0.777812	0.788454	0.779675	0.726404	0.821599	0.860108	0.782856	0.875668	0.918347	0.886017	0.852937	0.744928	0.817883	0.832439	0.7625	0.79379	0.817362	0.852047	0.790591
[truncated: 7,494 more rows]

## Sheet: Complete Charts
	SmartPLS Report
	Please cite the use of SmartPLS: Ringle, C. M., Wende, S., and Becker, J.-M. 2015. "SmartPLS 3." Boenningstedt: SmartPLS GmbH, http://www.smartpls.com.
	back to navigation
